# Supplementary material for: Nitrogen Fixation Mutants of the Actinobacterium Frankia Casuarinae CcI3
Source: PubMed Central journal article supplement (PMC5745019; doi:10.1264/jsme2.me17099), 2017-11-18
Supplement: 32_344_s1.pdf [file 32_344_s1.pdf]

|           |     | NGS      |          |          |          |                |
|-----------|-----|----------|----------|----------|----------|----------------|
|           |     |          |          |          |          | Sanger         |
| Reference | 161 | CGGCGCCC | GGTCCGCC | GGTCCGCC | GGTCCGCC | TCCGGTCATACCCG |
| WT        | 161 | CGGCGCCC | GGTCCGCC | GGTCCGCC | -----    | TCCGGTCATACCCG |
| N3H4      | 161 | CGGCGCCC | GGTCCGCC | GGTCCGCC | -----    | TCCGGTCATACCCG |
| N6F4      | 161 | CGGCGCCC | GGTCCGCC | GGTCCGCC | -----    | TCCGGTCATACCCG |
| N7C9      | 161 | CGGCGCCC | GGTCCGCC | GGTCCGCC | -----    | TCCGGTCATACCCG |
| N9D9      | 161 | CGGCGCCC | GGTCCGCC | GGTCCGCC | -----    | TCCGGTCATACCCG |
| N10E6     | 161 | CGGCGCCC | GGTCCGCC | GGTCCGCC | -----    | TCCGGTCATACCCG |

**Fig. S1.** Nucleotide sequence of the *hypF2* gene (Francci3\_1072). Repetitive sequences are boxed. Deletions detected by the next-generation sequencing (black bracket) and the Sanger sequence (blue bracket) are shown.

**A**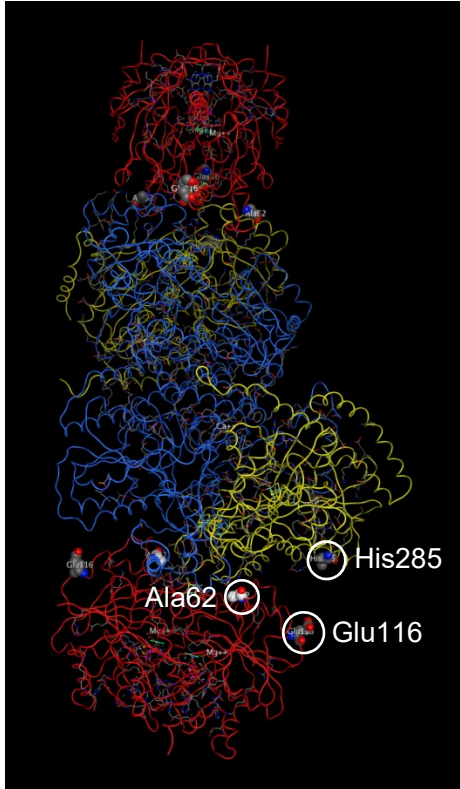**B**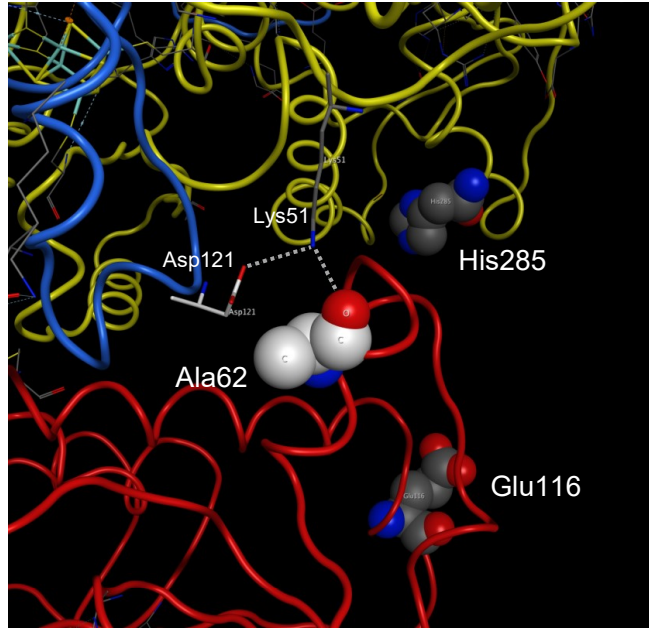

**Fig. S2.** Crystal structure of the nitrogenase complex of *Azotobacter vinelandii* (PDB ID: 1N2C). Yellow, blue and red polypeptides represent NifD, NifK and NifH, respectively. Overall structure (A) and a magnified view (B) are shown. Hydrogen bonds are represented as dashed gray line.

**Table S1.** Primers and TaqMan probes used in quantitative reverse-transcription PCR

| Gene (ID)                      | Usage <sup>a</sup> | Sequence (5' to 3')       |
|--------------------------------|--------------------|---------------------------|
| 16S rRNA<br>(Francci3_R0040)   | F                  | cggtgaaatgcgagatatcag     |
|                                | R                  | gtggactaccagggtatctaactct |
|                                | T                  | aaagcgtggggagcga          |
| <i>nifE</i><br>(Francci3_4485) | F                  | cgacgcaaaaatgatcaaag      |
|                                | R                  | gtaagggatatgccgctct       |
|                                | T                  | tgccgttcctcgatatcaac      |
| <i>nifH</i><br>(Francci3_4488) | F                  | agatgggcaagaaggatcatgac   |
|                                | R                  | aggtctgggccttggaatg       |
|                                | T                  | actcgaccggctcatcc         |
| <i>nifV</i><br>(Francci3_4489) | F                  | ttcaccgcagccgagaa         |
|                                | R                  | aggtattccggcctcgatct      |
|                                | T                  | ctgctctggacgccatcg        |

<sup>a</sup>F, forward primer; R, reverse primer; T, TaqMan probe

Table S2

**Table S2.** Mutations found in mutant genomes

| Position (nt) | Mutation type* | WT allele | Mutant allele | Gene ID       | Annotation                                     | N fixation related | Amino acid change | Reads that called a mutation/all reads (%) |      |      |      |      |       |        |
|---------------|----------------|-----------|---------------|---------------|------------------------------------------------|--------------------|-------------------|--------------------------------------------|------|------|------|------|-------|--------|
|               |                |           |               |               |                                                |                    |                   | N3H4                                       | N4H4 | N6F4 | N7C9 | N9D9 | N10E6 | G21E10 |
| 635           | SNV            | G         | A             | Francci3_0001 | chromosomal replication initiator protein DnaA |                    | Val201Ile         |                                            |      |      | 99.7 |      |       |        |
| 3,774         | SNV            | C         | T             | Francci3_0004 | recombination protein F                        |                    | Ala26Val          | 100                                        | 80.4 |      |      |      |       |        |
| 18,176        | SNV            | C         | T             |               |                                                |                    |                   |                                            |      |      |      | 99.8 |       |        |
| 28,054        | SNV            | C         | T             |               |                                                |                    |                   | 99.8                                       | 76.5 |      |      |      |       |        |
| 29,793        | SNV            | G         | A             | Francci3_0021 | CRISPR-associated Cas5e family                 |                    | Ala196Thr         |                                            |      |      |      | 99.3 |       |        |
| 29,864        | SNV            | G         | A             | Francci3_0021 | CRISPR-associated Cas5e family                 |                    |                   |                                            |      |      |      | 99.7 |       |        |
| 29,901        | SNV            | C         | T             | Francci3_0021 | CRISPR-associated Cas5e family                 |                    | Pro232Ser         | 99.7                                       | 83.9 |      |      |      |       |        |
| 30,042        | SNV            | G         | A             |               |                                                |                    |                   |                                            |      |      |      | 99.9 |       |        |
| 30,413        | SNV            | C         | T             | Francci3_0022 | hypothetical protein                           |                    | Thr123Ile         | 99.1                                       | 80.9 |      |      |      |       |        |
| 33,165        | SNV            | G         | C             | Francci3_0027 | hypothetical protein                           |                    | Arg76Pro          |                                            |      |      |      |      |       | 100    |
| 33,166        | SNV            | G         | T             | Francci3_0027 | hypothetical protein                           |                    |                   |                                            |      |      |      |      |       | 98.8   |
| 33,167        | SNV            | G         | C             | Francci3_0027 | hypothetical protein                           |                    | Gly77Arg          |                                            |      |      |      |      |       | 100    |
| 33,168        | SNV            | G         | A             | Francci3_0027 | hypothetical protein                           |                    | Gly77Glu          |                                            |      |      |      |      |       | 100    |
| 33,177        | SNV            | C         | G             | Francci3_0027 | hypothetical protein                           |                    | Ser80Trp          |                                            |      |      |      |      |       | 100    |
| 33,180        | SNV            | C         | A             | Francci3_0027 | hypothetical protein                           |                    | Ala81Glu          |                                            |      |      |      |      |       | 100    |
| 33,181        | SNV            | G         | A             | Francci3_0027 | hypothetical protein                           |                    |                   |                                            |      |      |      |      |       | 100    |
| 33,182        | SNV            | G         | A             | Francci3_0027 | hypothetical protein                           |                    | Gly82Ser          |                                            |      |      |      |      |       | 100    |
| 33,187        | SNV            | G         | T             | Francci3_0027 | hypothetical protein                           |                    |                   |                                            |      |      |      |      |       | 98.9   |
| 33,192        | SNV            | A         | C             | Francci3_0027 | hypothetical protein                           |                    | Gln85Pro          |                                            |      |      |      |      |       | 100    |
| 33,194        | SNV            | T         | G             | Francci3_0027 | hypothetical protein                           |                    | Trp86Gly          |                                            |      |      |      |      |       | 98.8   |
| 39,697        | SNV            | G         | A             | Francci3_0033 | PBP family phospholipid-binding                |                    | Ser101Asn         |                                            |      |      | 99.8 |      |       |        |
| 54,017        | SNV            | C         | T             | Francci3_0044 | serine/threonine protein kinase                |                    | Ser668Asn         |                                            |      |      | 99.8 |      |       |        |
| 59,143        | SNV            | G         | A             | Francci3_0047 | hypothetical protein                           |                    | Trp95*            |                                            |      | 99.7 |      |      |       |        |
| 70,043        | SNV            | G         | A             | Francci3_0054 | hypothetical protein                           |                    | Gly26Glu          |                                            | 99.6 |      |      |      |       |        |
| 81,769        | SNV            | G         | A             |               |                                                |                    |                   |                                            |      | 99.9 |      |      |       |        |
| 90,047        | SNV            | C         | T             | Francci3_0071 | hypothetical protein                           |                    | Pro223Ser         | 99.7                                       | 79.9 |      |      |      |       |        |
| 92,554        | SNV            | G         | A             | Francci3_0073 | hypothetical protein                           |                    | Ala56Val          |                                            |      | 99.8 |      |      |       |        |
| 101,161       | SNV            | C         | T             | Francci3_0082 | phosphoserine aminotransferase                 |                    | Thr365Met         |                                            |      |      |      | 99.8 |       |        |
| 108,757       | SNV            | T         | C             |               |                                                |                    |                   |                                            | 99.8 |      |      |      |       |        |
| 114,902       | SNV            | C         | T             | Francci3_0093 | hypothetical protein                           |                    | Pro197Ser         |                                            |      |      |      | 99.7 |       |        |
| 118,225       | SNV            | C         | T             |               |                                                |                    |                   |                                            | 99.4 |      |      |      |       |        |
| 120,352       | SNV            | G         | A             | Francci3_0098 | hypothetical protein                           |                    |                   |                                            |      |      | 99.7 |      |       |        |
| 133,561       | SNV            | G         | A             | Francci3_0110 | putative DNA helicase                          |                    | Ala394Thr         |                                            | 99.8 |      |      |      |       |        |
| 136,719       | SNV            | C         | T             | Francci3_0112 | B12-dependent methionine synthase              |                    |                   |                                            | 99.8 |      |      |      |       |        |
| 140,582       | SNV            | C         | T             | Francci3_0114 | phage integrase                                |                    | Gly340Asp         |                                            |      |      | 99.8 |      |       |        |
| 145,620       | SNV            | C         | T             | Francci3_0119 | signal transduction protein                    |                    |                   |                                            | 99.8 |      |      |      |       |        |
| 145,716       | SNV            | C         | T             | Francci3_0119 | signal transduction protein                    |                    |                   |                                            | 99.9 |      |      |      |       |        |
| 152,467       | SNV            | G         | A             | Francci3_0122 | transposase, IS4                               |                    |                   |                                            |      |      | 99.3 |      |       |        |

Table S2

| Position (nt) | Mutation type* | WT allele | Mutant allele | Gene ID       | Annotation                                                           | N fixation related | Amino acid change | Reads that called a mutation/all reads (%) |      |      |      |      |       |        |
|---------------|----------------|-----------|---------------|---------------|----------------------------------------------------------------------|--------------------|-------------------|--------------------------------------------|------|------|------|------|-------|--------|
|               |                |           |               |               |                                                                      |                    |                   | N3H4                                       | N4H4 | N6F4 | N7C9 | N9D9 | N10E6 | G21E10 |
| 152,742       | SNV            | C         | T             |               |                                                                      |                    |                   |                                            | 98.6 |      |      |      |       |        |
| 156,411       | SNV            | G         | A             | Francci3_0126 | hypothetical protein                                                 |                    |                   |                                            | 99.7 |      |      |      |       |        |
| 161,682       | SNV            | C         | T             |               |                                                                      |                    |                   |                                            |      |      |      | 93.8 |       |        |
| 163,851       | SNV            | C         | T             |               |                                                                      |                    |                   |                                            |      |      |      | 93.6 |       |        |
| 164,759       | SNV            | C         | T             |               |                                                                      |                    |                   |                                            |      |      |      | 94.9 |       |        |
| 164,897       | SNV            | C         | T             |               |                                                                      |                    |                   |                                            |      |      |      | 94.6 |       |        |
| 165,376       | SNV            | C         | T             |               |                                                                      |                    |                   |                                            |      |      |      | 93.6 |       |        |
| 166,179       | SNV            | C         | T             | Francci3_0138 | cell divisionFtsK/SpoIIIE                                            |                    | His54Tyr          |                                            |      |      |      | 94.9 |       |        |
| 167,381       | SNV            | C         | T             | Francci3_0138 | cell divisionFtsK/SpoIIIE                                            |                    |                   |                                            |      |      |      | 94.6 |       |        |
| 168,146       | SNV            | C         | T             | Francci3_0139 | hypothetical protein                                                 |                    |                   |                                            |      |      |      | 97.7 |       |        |
| 172,683       | SNV            | G         | A             | Francci3_0144 | transposase IS66                                                     |                    | Ala264Thr         |                                            |      |      |      | 99.6 |       |        |
| 183,527       | SNV            | G         | A             | Francci3_0156 | hypothetical protein                                                 |                    | Ala275Val         |                                            |      |      |      | 94.2 |       |        |
| 215,363       | SNV            | C         | T             | Francci3_0183 | L-threonine aldolase                                                 |                    |                   | 99.8                                       |      | 80.3 |      |      |       |        |
| 229,703       | SNV            | C         | T             | Francci3_0194 | hypothetical protein                                                 |                    | Ala383Val         |                                            | 99.8 |      |      |      |       |        |
| 242,254       | SNV            | C         | T             | Francci3_0204 | putative O-methyltransferase                                         |                    | Gly62Ser          |                                            | 99.8 |      |      |      |       |        |
| 244,477       | SNV            | C         | T             |               |                                                                      |                    |                   |                                            |      |      | 99.5 |      |       |        |
| 246,858       | SNV            | G         | A             | Francci3_0208 | XRE family transcriptional regulator                                 |                    |                   |                                            | 99.9 |      |      |      |       |        |
| 248,324       | SNV            | G         | A             | Francci3_0210 | MarR family transcriptional regulator                                |                    | Arg203Trp         |                                            | 99.6 |      |      |      |       |        |
| 270,916       | SNV            | C         | T             |               |                                                                      |                    |                   |                                            |      |      | 99.6 |      |       |        |
| 277,100       | SNV            | C         | T             | Francci3_0236 | HemK family modification methylase                                   |                    | Ala314Val         |                                            |      |      | 99.7 |      |       |        |
| 280,486       | SNV            | C         | T             | Francci3_0241 | ABC transporter related                                              |                    | Arg131Cys         |                                            |      |      |      | 99.9 |       |        |
| 287,597       | SNV            | C         | T             | Francci3_0249 | ABC transporter related                                              |                    |                   |                                            |      | 99.9 |      |      |       |        |
| 288,877       | SNV            | G         | A             | Francci3_0250 | binding-protein-dependent transport systems inner membrane component |                    |                   |                                            |      |      |      | 100  |       |        |
| 289,805       | SNV            | G         | A             | Francci3_0251 | putative sulfonate binding protein                                   |                    | Ala150Val         |                                            |      |      |      | 99.7 |       |        |
| 305,465       | SNV            | C         | T             |               |                                                                      |                    |                   | 99.8                                       |      | 81.2 |      |      |       |        |
| 333,671       | SNV            | G         | A             | Francci3_0287 | magnesium and cobalt transport protein CorA                          |                    | Ser84Phe          |                                            |      |      | 99.6 |      |       |        |
| 334,014       | SNV            | C         | T             |               |                                                                      |                    |                   | 99.9                                       |      | 78.8 |      |      |       |        |
| 337,585       | SNV            | G         | A             | Francci3_0291 | multi-sensor signal transduction histidine kinase                    |                    | Glu135Lys         |                                            |      |      | 99.9 |      |       |        |
| 337,733       | SNV            | G         | A             | Francci3_0291 | multi-sensor signal transduction histidine kinase                    |                    | Arg184His         |                                            |      |      | 99.5 |      |       |        |
| 339,372       | SNV            | G         | A             | Francci3_0292 | hypothetical protein                                                 |                    |                   |                                            |      |      | 100  |      |       |        |
| 344,203       | SNV            | G         | A             | Francci3_0296 | insertion element hypothetical protein                               |                    | Pro198Leu         | 99.6                                       |      | 72.0 |      |      |       |        |
| 356,941       | SNV            | G         | A             | Francci3_0309 | periplasmic sensor signal transduction histidine kinase              |                    | Ala444Thr         |                                            |      | 99.5 |      |      |       |        |
| 362,442       | SNV            | G         | A             | Francci3_0314 | amidohydrolase 2                                                     |                    | Ala119Val         |                                            |      |      | 99.7 |      |       |        |
| 365,607       | SNV            | C         | T             | Francci3_0316 | saccharopine dehydrogenase                                           |                    | Gly115Ser         |                                            |      |      |      | 99.9 |       |        |
| 366,277       | SNV            | G         | A             | Francci3_0317 | pyruvate carboxylase                                                 |                    | Gly81Ser          |                                            | 99.6 |      |      | 99.6 | 99.4  | 100    |
| 369,854       | SNV            | C         | T             | Francci3_0318 | glycosyl transferase family protein                                  |                    |                   |                                            | 76.8 |      |      |      |       |        |

Table S2

| Position (nt) | Mutation type* | WT allele | Mutant allele | Gene ID       | Annotation                                              | N fixation related | Amino acid change | Reads that called a mutation/all reads (%) |      |      |      |      |       |        |
|---------------|----------------|-----------|---------------|---------------|---------------------------------------------------------|--------------------|-------------------|--------------------------------------------|------|------|------|------|-------|--------|
|               |                |           |               |               |                                                         |                    |                   | N3H4                                       | N4H4 | N6F4 | N7C9 | N9D9 | N10E6 | G21E10 |
| 374,084       | SNV            | C         | T             | Francci3_0320 | periplasmic sensor signal transduction histidine kinase |                    | Glu407Lys         | 99.5                                       |      | 78.9 |      |      |       |        |
| 374,268       | SNV            | G         | A             | Francci3_0320 | periplasmic sensor signal transduction histidine kinase |                    |                   | 99.7                                       |      | 77.6 |      |      |       |        |
| 386,869       | SNV            | G         | A             | Francci3_0330 | MarR family transcriptional regulator                   |                    | Arg61Trp          |                                            | 99.9 |      |      |      |       |        |
| 388,918       | SNV            | G         | A             | Francci3_0332 | metallophosphoesterase                                  |                    |                   | 100                                        |      | 76.7 |      |      |       |        |
| 392,523       | SNV            | G         | A             | Francci3_0338 | L-asparaginase II                                       |                    | Gly205Glu         |                                            |      |      | 99.2 |      |       |        |
| 455,633       | SNV            | C         | T             | Francci3_0382 | amino acid/amide ABC transporter ATP-binding protein    |                    |                   |                                            |      |      |      |      |       | 99.3   |
| 461,677       | SNV            | G         | A             |               |                                                         |                    |                   |                                            |      |      |      | 99.8 |       |        |
| 465,228       | SNV            | C         | T             | Francci3_0393 | recombinase                                             |                    |                   |                                            | 99.7 |      |      |      |       |        |
| 485,601       | SNV            | C         | T             | Francci3_0409 | peptidoglycan-binding LysM                              |                    | Glu69Lys          |                                            |      | 99.8 |      |      |       |        |
| 486,381       | SNV            | C         | T             |               |                                                         |                    |                   |                                            | 99.7 |      |      |      |       |        |
| 488,602       | SNV            | C         | T             | Francci3_0412 | cell divisionFtsK/SpoIIIE                               |                    | Asp1093Asn        |                                            |      |      | 99.4 |      |       |        |
| 490,557       | SNV            | G         | A             | Francci3_0412 | cell divisionFtsK/SpoIIIE                               |                    | Ser441Phe         |                                            |      |      | 99.9 |      |       |        |
| 491,451       | SNV            | C         | T             | Francci3_0412 | cell divisionFtsK/SpoIIIE                               |                    | Arg143Gln         | 99.9                                       |      | 78.7 |      |      |       |        |
| 491,695       | SNV            | G         | A             | Francci3_0412 | cell divisionFtsK/SpoIIIE                               |                    |                   |                                            | 99.8 |      |      |      |       |        |
| 494,891       | SNV            | C         | T             |               |                                                         |                    |                   |                                            |      |      | 99.8 |      |       |        |
| 548,093       | SNV            | G         | A             |               |                                                         |                    |                   |                                            | 99.9 |      |      |      |       |        |
| 551,806       | SNV            | C         | T             |               |                                                         |                    |                   |                                            |      |      |      | 99.8 |       |        |
| 565,885       | SNV            | G         | A             | Francci3_0484 | redox-sensing transcriptional repressor Rex             |                    | Asp56Asn          |                                            |      |      | 99.9 |      |       |        |
| 568,049       | SNV            | G         | A             | Francci3_0485 | glutamyl-tRNA reductase                                 |                    |                   |                                            |      |      | 99.8 |      |       |        |
| 572,439       | SNV            | G         | A             |               |                                                         |                    |                   |                                            |      | 99.4 |      |      |       |        |
| 572,837       | SNV            | G         | A             |               |                                                         |                    |                   |                                            |      |      | 99.4 |      |       |        |
| 573,496       | SNV            | G         | A             | Francci3_0490 | heavy metal translocating P-type                        |                    | Ala74Thr          |                                            |      |      | 99.9 |      |       |        |
| 576,885       | SNV            | G         | A             | Francci3_0491 | methionyl-tRNA synthetase                               |                    | Arg192Cys         |                                            |      |      |      | 99.9 |       |        |
| 579,072       | SNV            | G         | A             |               |                                                         |                    |                   |                                            |      |      | 99.7 |      |       |        |
| 579,243       | SNV            | G         | A             |               |                                                         |                    |                   |                                            |      |      | 99.6 |      |       |        |
| 579,375       | SNV            | C         | T             | Francci3_0494 | hypothetical protein                                    |                    |                   |                                            |      |      | 99.5 |      |       |        |
| 579,956       | SNV            | G         | A             | Francci3_0494 | hypothetical protein                                    |                    | Gly201Asp         |                                            |      |      | 99.2 |      |       |        |
| 581,183       | SNV            | G         | A             | Francci3_0496 | integrase                                               |                    | Gly217Arg         |                                            |      |      | 99.5 |      |       |        |
| 590,244       | SNV            | G         | A             |               |                                                         |                    |                   |                                            |      |      | 99.8 |      |       |        |
| 591,926       | SNV            | G         | A             | Francci3_0506 | hypothetical protein                                    |                    |                   |                                            |      |      | 99.6 |      |       |        |
| 606,917       | SNV            | C         | T             | Francci3_0522 | hypothetical protein                                    |                    | Thr3Ile           |                                            |      |      | 99.8 |      |       |        |
| 613,269       | SNV            | C         | T             | Francci3_0528 | uroporphyrinogen-III C-                                 |                    |                   |                                            |      | 99.5 |      |      |       |        |
| 618,959       | SNV            | G         | C             |               |                                                         |                    |                   |                                            | 99.5 | 99.6 | 99.6 | 99.6 |       |        |
| 626,021       | SNV            | G         | A             | Francci3_0539 | NADH dehydrogenase subunit B                            |                    | Ala226Thr         |                                            |      |      |      | 99.5 |       |        |
| 641,339       | SNV            | C         | T             | Francci3_0551 | NADH dehydrogenase subunit N                            |                    | Ala429Val         |                                            |      |      | 99.9 |      |       |        |
| 649,890       | SNV            | G         | A             |               |                                                         |                    |                   |                                            |      |      |      | 99.8 |       |        |

Table S2

| Position (nt) | Mutation type* | WT allele | Mutant allele | Gene ID       | Annotation                                         | N fixation related | Amino acid change | Reads that called a mutation/all reads (%) |      |      |      |      |       |        |
|---------------|----------------|-----------|---------------|---------------|----------------------------------------------------|--------------------|-------------------|--------------------------------------------|------|------|------|------|-------|--------|
|               |                |           |               |               |                                                    |                    |                   | N3H4                                       | N4H4 | N6F4 | N7C9 | N9D9 | N10E6 | G21E10 |
| 649,919       | SNV            | G         | A             |               |                                                    |                    |                   |                                            |      |      |      | 99.7 |       |        |
| 651,803       | SNV            | G         | A             | Francci3_0560 | AIG2-like                                          |                    | Gly89Ser          |                                            |      |      |      | 99.9 |       |        |
| 664,551       | SNV            | G         | A             | Francci3_0573 | DNA-directed RNA polymerase subunit beta           |                    | Gly518Asp         |                                            |      |      |      | 99.7 |       |        |
| 664,598       | SNV            | G         | A             | Francci3_0573 | DNA-directed RNA polymerase subunit beta           |                    | Val534Ile         |                                            |      |      |      | 99.6 |       |        |
| 683,805       | SNV            | C         | T             |               |                                                    |                    |                   |                                            |      |      |      | 99.9 |       |        |
| 691,339       | SNV            | G         | A             | Francci3_0606 | 50S ribosomal protein L36                          |                    | Gly21Glu          |                                            | 99.7 |      |      |      |       |        |
| 694,215       | SNV            | G         | A             | Francci3_0610 | DNA-directed RNA polymerase subunit alpha          |                    | Arg287His         |                                            |      |      | 99.9 |      |       |        |
| 700,697       | SNV            | G         | A             | Francci3_0617 | glucosamine--fructose-6-phosphate aminotransferase |                    | Gly49Asp          |                                            |      |      |      | 99.6 |       |        |
| 707,850       | SNV            | C         | T             | Francci3_0623 | hypothetical protein                               |                    | Ala66Thr          |                                            |      |      |      |      | 99.5  |        |
| 709,091       | SNV            | G         | A             | Francci3_0624 | serine hydroxymethyltransferase                    |                    |                   |                                            |      |      |      | 99.6 |       |        |
| 709,707       | SNV            | G         | A             |               |                                                    |                    |                   |                                            |      |      |      | 99.6 |       |        |
| 710,306       | SNV            | C         | T             | Francci3_0625 | alpha/beta hydrolase fold                          |                    | Pro149Leu         |                                            |      |      | 99.4 |      |       |        |
| 710,527       | SNV            | C         | T             | Francci3_0625 | alpha/beta hydrolase fold                          |                    | Pro223Ser         |                                            |      |      | 99.6 |      |       |        |
| 711,347       | SNV            | C         | T             | Francci3_0626 | hypothetical protein                               |                    |                   |                                            |      |      | 99.4 |      |       |        |
| 712,128       | SNV            | C         | T             | Francci3_0627 | peptidase M22, glycoprotease                       |                    |                   |                                            |      |      | 99.7 |      |       |        |
| 716,001       | SNV            | G         | A             | Francci3_0633 | chaperonin GroEL                                   |                    | Val106Met         |                                            |      |      |      | 100  |       |        |
| 724,312       | SNV            | C         | T             | Francci3_0639 | hypothetical protein                               |                    | Ala71Val          |                                            |      |      |      | 99.9 |       |        |
| 733,743       | SNV            | G         | A             |               |                                                    |                    |                   |                                            |      |      | 99.7 |      |       |        |
| 740,991       | SNV            | G         | A             |               |                                                    |                    |                   |                                            |      |      | 99.5 |      |       |        |
| 759,686       | SNV            | C         | T             | Francci3_0663 | ribonuclease BN                                    |                    | Leu271Phe         |                                            |      |      |      | 100  |       |        |
| 763,614       | SNV            | C         | T             | Francci3_0666 | GCN5-related N-acetyltransferase                   |                    | Trp50*            |                                            |      |      |      | 99.6 |       |        |
| 773,372       | SNV            | C         | T             | Francci3_0677 | ATP-dependent DNA helicase RecQ                    |                    | Ala321Val         |                                            |      |      | 99.7 |      |       |        |
| 774,436       | SNV            | G         | A             | Francci3_0677 | ATP-dependent DNA helicase RecQ                    |                    | Val676Ile         |                                            |      |      | 100  |      |       |        |
| 775,543       | SNV            | C         | T             | Francci3_0679 | succinate dehydrogenase flavoprotein subunit       |                    | Asp535Asn         |                                            |      |      | 99.6 |      |       |        |
| 777,966       | SNV            | C         | T             | Francci3_0681 | succinate dehydrogenase, cytochrome b subunit      |                    | Val29Ile          |                                            |      |      | 99.9 |      |       |        |
| 780,757       | SNV            | C         | T             | Francci3_0683 | serine/threonine protein kinase                    |                    | Asp584Asn         |                                            |      |      | 99.8 |      |       |        |
| 786,665       | SNV            | C         | T             | Francci3_0688 | deoxyribose-phosphate aldolase                     |                    | Gly188Asp         |                                            |      |      | 99.4 |      |       |        |
| 827,044       | SNV            | G         | A             |               |                                                    |                    |                   |                                            |      |      | 99.6 |      |       |        |
| 845,101       | SNV            | G         | A             | Francci3_0730 | glycosyl transferase family protein                |                    | Gly29Glu          |                                            |      |      |      | 99.9 |       |        |
| 851,890       | SNV            | C         | T             | Francci3_0736 | glycosyl transferase family protein                |                    |                   |                                            |      |      | 100  |      |       |        |
| 859,601       | SNV            | C         | T             | Francci3_0742 | LPPG:FO 2-phospho-L-lactate                        |                    | Gly17Ser          |                                            |      |      |      |      | 100   | 99.3   |
| 860,482       | SNV            | C         | T             | Francci3_0743 | TetR family transcriptional regulator              |                    | Arg2His           |                                            |      |      | 99.6 |      |       |        |
| 864,442       | SNV            | C         | T             | Francci3_0746 | transcription factor WhiB                          |                    | Thr61Ile          |                                            |      |      | 99.7 |      |       |        |
| 867,278       | SNV            | C         | T             | Francci3_0747 | glycosyltransferases-like                          |                    |                   |                                            |      |      | 99.8 |      |       |        |

Table S2

| Position (nt) | Mutation type* | WT allele         | Mutant allele | Gene ID       | Annotation                                                       | N fixation related | Amino acid change  | Reads that called a mutation/all reads (%) |      |      |      |      |       |        |
|---------------|----------------|-------------------|---------------|---------------|------------------------------------------------------------------|--------------------|--------------------|--------------------------------------------|------|------|------|------|-------|--------|
|               |                |                   |               |               |                                                                  |                    |                    | N3H4                                       | N4H4 | N6F4 | N7C9 | N9D9 | N10E6 | G21E10 |
| 870,968       | SNV            | G                 | A             | Francci3_0748 | mannose-6-phosphate isomerase                                    |                    | Ala179Val          |                                            |      |      |      | 99.7 |       |        |
| 875,338       | SNV            | G                 | A             | Francci3_0753 | hypothetical protein                                             |                    | Asp268Asn          |                                            |      |      |      | 99.8 |       |        |
| 885,477       | SNV            | G                 | A             | Francci3_0760 | hypothetical protein                                             |                    | Pro163Leu          |                                            |      |      |      | 99.6 |       |        |
| 888,996       | SNV            | G                 | A             |               |                                                                  |                    |                    |                                            |      |      |      | 99.8 |       |        |
| 892,625       | SNV            | G                 | A             | Francci3_0767 | preprotein translocase subunit SecA                              |                    |                    |                                            |      |      |      | 99.9 |       |        |
| 896,288       | SNV            | C                 | T             | Francci3_0769 | hypothetical protein                                             |                    | Gly218Asp          |                                            |      |      |      | 99.3 |       |        |
| 898,595       | SNV            | G                 | A             | Francci3_0772 | hypothetical protein                                             |                    | Gly121Glu          |                                            |      |      |      | 99.9 |       |        |
| 899,224       | SNV            | G                 | A             | Francci3_0773 | chromosome partitioning ATPase protein-like                      |                    | Gly74Asp           |                                            |      |      |      | 99.7 |       |        |
| 899,328       | SNV            | G                 | A             | Francci3_0773 | chromosome partitioning ATPase protein-like                      |                    | Val109Ile          |                                            |      |      |      | 99.8 |       |        |
| 904,727       | SNV            | G                 | A             | Francci3_0777 | hypothetical protein                                             |                    |                    |                                            |      |      |      | 99.8 |       |        |
| 906,938       | SNV            | C                 | T             |               |                                                                  |                    |                    |                                            |      |      |      | 99.8 |       |        |
| 907,746       | SNV            | G                 | A             | Francci3_0779 | type II secretion system protein E                               |                    | Val120Ile          |                                            |      |      |      | 99.6 |       |        |
| 908,223       | SNV            | G                 | A             | Francci3_0779 | type II secretion system protein E                               |                    | Asp279Asn          |                                            |      |      |      | 99.7 |       |        |
| 916,069       | SNV            | C                 | T             | Francci3_0786 | peptidase S15                                                    |                    | Gly514Asp          |                                            |      |      |      | 100  |       |        |
| 917,696       | SNV            | G                 | A             | Francci3_0787 | hypothetical protein                                             |                    |                    |                                            |      |      |      | 99.9 |       |        |
| 926,855       | SNV            | G                 | A             | Francci3_0794 | assimilatory nitrite reductase (NAD(P)H) large subunit precursor |                    | Ala618Thr          |                                            |      |      |      | 99.8 |       |        |
| 933,268       | SNV            | C                 | T             | Francci3_0801 | SsrA-binding protein                                             |                    | Thr99Ile           |                                            |      |      |      |      | 100   |        |
| 936,706       | SNV            | C                 | T             | Francci3_0804 | hypothetical protein                                             |                    | Arg2Gln            | 99.8                                       |      | 84.1 |      |      |       |        |
| 939,241       | SNV            | C                 | T             |               |                                                                  |                    |                    | 99.5                                       |      | 76.4 |      |      |       |        |
| 942,102       | SNV            | C                 | T             | Francci3_0810 | resolvase helix-turn-helix region                                |                    | Gly31Asp           |                                            |      |      |      | 99.6 |       |        |
| 944,727       | SNV            | C                 | T             | Francci3_0813 | hypothetical protein                                             |                    | Pro278Ser          |                                            |      |      |      | 99.8 |       |        |
| 947,895       | SNV            | C                 | T             |               |                                                                  |                    |                    |                                            |      |      |      | 99.8 |       |        |
| 948,208       | SNV            | C                 | T             |               |                                                                  |                    |                    |                                            |      |      |      | 99.9 |       |        |
| 948,444       | SNV            | C                 | T             | Francci3_0815 | NUDIX hydrolase                                                  |                    | Pro34Ser           |                                            |      |      |      | 99.9 |       |        |
| 958,219       | SNV            | G                 | A             | Francci3_0821 | putative squalene/phytoene dehydrogenase (spd), FRAAL1430        | yes                | Glu425Lys          |                                            |      |      |      | 99.9 |       |        |
| 972,847       | SNV            | G                 | A             | Francci3_0832 | urease subunit alpha                                             |                    |                    |                                            |      |      |      | 99.9 |       |        |
| 989,301       | Deletion       | CCCG<br>GGGT<br>G | -             | Francci3_0847 | hypothetical protein                                             |                    | Pro27_Thr29<br>del |                                            | 68.6 |      | 67.8 | 67.1 | 67.9  |        |
| 998,973       | Deletion       | CGGC<br>TGG       | -             |               |                                                                  |                    |                    | 85.6                                       |      | 69.6 |      |      |       |        |
| 1,021,021     | SNV            | C                 | T             | Francci3_0876 | putative ATP/GTP binding protein                                 |                    | Arg203His          |                                            |      |      |      | 99.7 |       |        |
| 1,022,313     | SNV            | G                 | A             | Francci3_0877 | DNA integration/recombination/inversion                          |                    | Ala115Thr          | 99.9                                       |      | 80.0 |      |      |       |        |
| 1,025,191     | SNV            | C                 | T             | Francci3_0880 | antirestriction protein                                          |                    |                    | 99.6                                       |      | 84.3 |      |      |       |        |
| 1,033,703     | SNV            | C                 | T             |               |                                                                  |                    |                    |                                            |      |      |      | 99.8 |       |        |



Table S2

| Position (nt) | Mutation type* | WT allele | Mutant allele | Gene ID       | Annotation                                                        | N fixation related | Amino acid change | Reads that called a mutation/all reads (%) |      |      |      |      |       |        |       |
|---------------|----------------|-----------|---------------|---------------|-------------------------------------------------------------------|--------------------|-------------------|--------------------------------------------|------|------|------|------|-------|--------|-------|
|               |                |           |               |               |                                                                   |                    |                   | N3H4                                       | N4H4 | N6F4 | N7C9 | N9D9 | N10E6 | G21E10 | G23C4 |
| 1,033,729     | SNV            | C         | T             |               |                                                                   |                    |                   |                                            |      |      |      | 99.9 |       |        |       |
| 1,047,325     | SNV            | G         | A             |               |                                                                   |                    |                   |                                            |      |      |      | 99.9 |       |        |       |
| 1,050,093     | SNV            | G         | A             | Francci3_0906 | Type IV secretory pathway VirD4 components-like                   |                    |                   |                                            |      |      |      | 99.6 |       |        |       |
| 1,051,590     | SNV            | C         | T             | Francci3_0907 | hypothetical protein                                              |                    | Ala98Val          |                                            |      | 99.7 |      |      |       |        |       |
| 1,053,590     | SNV            | G         | A             | Francci3_0910 | recombinase                                                       |                    |                   |                                            | 99.9 |      |      |      |       |        |       |
| 1,066,859     | SNV            | C         | T             | Francci3_0923 | ATP-dependent transcription regulator LuxR                        |                    | Pro297Ser         | 56.3                                       |      |      |      |      |       |        |       |
| 1,070,540     | SNV            | G         | A             |               |                                                                   |                    |                   |                                            |      |      |      | 99.7 |       |        |       |
| 1,101,724     | SNV            | G         | A             | Francci3_0937 | pyridine nucleotide-disulphide oxidoreductase dimerisation region |                    | Arg245Gln         | 51.6                                       |      |      |      |      |       |        |       |
| 1,103,975     | SNV            | C         | T             | Francci3_0938 | FAD dependent oxidoreductase                                      |                    | Gly122Asp         |                                            |      |      | 99.7 |      |       |        |       |
| 1,115,956     | SNV            | G         | A             | Francci3_0947 | FHA domain-containing protein                                     |                    |                   |                                            |      | 79.9 |      |      |       |        |       |
| 1,121,055     | SNV            | C         | T             | Francci3_0949 | hypothetical protein                                              |                    | Gly201Glu         |                                            |      |      |      | 99.9 |       |        |       |
| 1,130,852     | SNV            | G         | A             | Francci3_0956 | hypothetical protein                                              |                    | Pro5Ser           |                                            |      |      |      | 99.9 |       |        |       |
| 1,135,739     | SNV            | G         | A             | Francci3_0962 | D-lactate dehydrogenase                                           |                    |                   |                                            |      |      |      | 99.4 |       |        |       |
| 1,136,325     | SNV            | C         | T             | Francci3_0962 | D-lactate dehydrogenase                                           |                    |                   |                                            |      |      | 99.9 |      |       |        |       |
| 1,136,619     | SNV            | G         | A             | Francci3_0962 | D-lactate dehydrogenase                                           |                    | Ala555Thr         |                                            |      |      |      | 99.0 |       |        |       |
| 1,140,250     | SNV            | G         | A             | Francci3_0964 | glycosyl transferase family protein                               |                    | Val340Ile         |                                            |      |      |      | 99.3 |       |        |       |
| 1,144,065     | SNV            | C         | T             | Francci3_0966 | hypothetical protein                                              |                    |                   |                                            |      |      |      | 99.6 |       |        |       |
| 1,150,728     | SNV            | G         | A             | Francci3_0973 | methyltransferase type 11                                         |                    |                   | 99.8                                       |      | 82.7 |      |      |       |        |       |
| 1,152,090     | SNV            | G         | A             | Francci3_0974 | hypothetical protein                                              |                    |                   | 99.4                                       |      | 79.5 |      |      |       |        |       |
| 1,153,235     | SNV            | G         | A             | Francci3_0975 | NADH dehydrogenase                                                |                    | Arg237Trp         |                                            |      |      |      | 99.6 |       |        |       |
| 1,155,430     | SNV            | C         | T             | Francci3_0976 | NAD-dependent                                                     |                    | Val70Ile          | 99.3                                       |      | 81.9 |      |      |       |        |       |
| 1,165,765     | SNV            | G         | A             |               |                                                                   |                    |                   |                                            | 99.7 |      |      |      |       |        |       |
| 1,167,194     | SNV            | G         | A             |               |                                                                   |                    |                   |                                            | 99.5 |      |      |      |       |        |       |
| 1,168,624     | SNV            | C         | T             | Francci3_0988 | carboxyl transferase                                              |                    | Glu596Lys         | 99.8                                       |      | 83.5 |      |      |       |        |       |
| 1,168,755     | SNV            | C         | T             | Francci3_0988 | carboxyl transferase                                              |                    | Gly552Asp         |                                            |      |      | 74.2 |      |       |        |       |
| 1,187,021     | SNV            | G         | A             | Francci3_0997 | alpha/beta hydrolase fold                                         |                    |                   |                                            |      |      |      | 99.6 |       |        |       |
| 1,188,050     | SNV            | A         | G             | Francci3_0998 | hypothetical protein                                              |                    | Ser116Pro         |                                            |      |      |      | 99.5 |       |        |       |
| 1,188,579     | SNV            | C         | T             |               |                                                                   |                    |                   |                                            | 99.6 |      | 99.3 | 99.5 | 99.7  | 100    | 100   |
| 1,194,828     | SNV            | C         | T             |               |                                                                   |                    |                   |                                            |      |      | 99.7 |      |       |        |       |
| 1,208,808     | SNV            | G         | A             | Francci3_1014 | hypothetical protein                                              |                    |                   |                                            |      |      | 99.3 |      |       |        |       |
| 1,209,586     | SNV            | G         | A             | Francci3_1015 | putative DNA-binding protein                                      |                    | Ala84Thr          |                                            |      | 99.9 |      |      |       |        |       |
| 1,217,386     | SNV            | C         | T             | Francci3_1022 | XRE family transcriptional regulator                              |                    |                   |                                            |      |      |      | 99.7 |       |        |       |
| 1,221,346     | SNV            | C         | T             | Francci3_1028 | cell divisionFtsK/SpoIIIE                                         |                    | Pro451Ser         |                                            |      |      |      | 99.7 |       |        |       |
| 1,223,525     | SNV            | C         | T             | Francci3_1031 | excisionase/Xis, DNA-binding                                      |                    | Thr2Ile           |                                            |      |      |      | 99.8 |       |        |       |
| 1,225,243     | SNV            | G         | A             |               |                                                                   |                    |                   |                                            | 99.8 |      |      |      |       |        |       |
| 1,230,948     | SNV            | C         | T             | Francci3_1035 | hypothetical protein                                              |                    | Pro74Leu          |                                            |      |      |      | 99.6 |       |        |       |
| 1,232,854     | SNV            | C         | T             | Francci3_1037 | polysaccharide deacetylase                                        |                    | Pro218Leu         |                                            | 99.8 |      |      |      |       |        |       |

Table S2

| Position (nt) | Mutation type* | WT allele    | Mutant allele | Gene ID       | Annotation                                                       | N fixation related | Amino acid change | Reads that called a mutation/all reads (%) |      |      |      |      |       |        |       |
|---------------|----------------|--------------|---------------|---------------|------------------------------------------------------------------|--------------------|-------------------|--------------------------------------------|------|------|------|------|-------|--------|-------|
|               |                |              |               |               |                                                                  |                    |                   | N3H4                                       | N4H4 | N6F4 | N7C9 | N9D9 | N10E6 | G21E10 | G23C4 |
| 1,233,877     | SNV            | C            | T             | Francci3_1038 | aldehyde dehydrogenase                                           |                    | Ala238Thr         |                                            |      |      |      |      | 99.7  |        |       |
| 1,238,544     | SNV            | C            | T             | Francci3_1042 | endopeptidase La                                                 |                    | Gly128Asp         |                                            |      |      |      | 99.7 |       |        |       |
| 1,254,681     | SNV            | G            | A             | Francci3_1054 | acyltransferase 3                                                |                    |                   |                                            |      | 99.8 |      |      |       |        |       |
| 1,278,183     | Deletion       | CGCC<br>CGGT | -             | Francci3_1072 | hydrogenase maturation protein hypF2. FRAAL1825                  | yes                | Thr12_Arg14 del   | 80.5                                       | 81.6 | 83.4 | 82.8 | 80.7 | 82.6  |        | NA†   |
| 1,294,465     | SNV            | C            | T             | Francci3_1084 | hypothetical protein                                             |                    | Gly321Asp         |                                            |      |      | 99.3 |      |       |        |       |
| 1,309,941     | SNV            | G            | A             | Francci3_1097 | hypothetical protein                                             |                    | Pro7Ser           |                                            |      |      |      |      | 99.7  |        |       |
| 1,337,245     | SNV            | G            | A             |               |                                                                  |                    |                   |                                            |      |      |      | 99.7 |       |        |       |
| 1,341,384     | SNV            | G            | A             | Francci3_1127 | lantibiotic dehydratase-like                                     |                    | Pro803Leu         |                                            |      |      | 99.8 |      |       |        |       |
| 1,355,246     | SNV            | C            | T             | Francci3_1140 | hypothetical protein                                             |                    | Arg43Cys          |                                            |      |      |      | 99.7 |       |        |       |
| 1,367,403     | SNV            | C            | T             | Francci3_1150 | alpha amylase, catalytic region                                  |                    | Ala385Thr         |                                            |      |      | 99.8 |      |       |        |       |
| 1,368,037     | SNV            | C            | T             | Francci3_1150 | alpha amylase, catalytic region                                  |                    |                   |                                            |      |      | 99.7 |      |       |        |       |
| 1,369,297     | SNV            | C            | T             | Francci3_1151 | serine phosphatase                                               |                    |                   |                                            |      |      | 99.7 |      |       |        |       |
| 1,369,387     | SNV            | G            | A             | Francci3_1151 | serine phosphatase                                               |                    |                   |                                            |      |      |      |      | 99.8  |        |       |
| 1,383,035     | SNV            | C            | T             | Francci3_1160 | Membrane alanyl aminopeptidase. Metallo peptidase. MEROPS family |                    | Trp169*           |                                            |      |      |      |      |       | 100    | 98.7  |
| 1,411,329     | SNV            | C            | T             | Francci3_1180 | exodeoxyribonuclease III                                         |                    | Ala286Thr         | 99.8                                       |      | 85.5 |      |      |       |        |       |
| 1,417,995     | SNV            | G            | A             | Francci3_1185 | dihydroorotate oxidase B, catalytic                              |                    | Gly82Asp          |                                            |      |      |      |      | 99.8  |        |       |
| 1,432,635     | SNV            | C            | T             | Francci3_1199 | putative ATP-binding protein                                     |                    |                   |                                            |      |      |      | 99.8 |       |        |       |
| 1,438,453     | SNV            | C            | T             |               |                                                                  |                    |                   |                                            |      |      | 99.3 |      |       |        |       |
| 1,456,880     | SNV            | G            | A             | Francci3_1218 | ribonuclease                                                     |                    | Glu540Lys         |                                            |      |      |      |      | 99.8  |        |       |
| 1,470,337     | SNV            | C            | T             | Francci3_1227 | gamma-glutamyl phosphate reductase                               |                    | Pro402Ser         |                                            |      |      | 99.5 |      |       |        |       |
| 1,471,752     | SNV            | C            | T             | Francci3_1228 | malate synthase                                                  |                    |                   |                                            |      |      |      | 99.9 |       |        |       |
| 1,485,421     | SNV            | C            | T             | Francci3_1240 | Poly(3-hydroxybutyrate)                                          |                    |                   | 99.4                                       |      | 78.6 |      |      |       |        |       |
| 1,486,124     | SNV            | G            | A             | Francci3_1241 | beta-lactamase-like                                              |                    | Ser149Asn         |                                            |      |      |      |      | 99.8  |        |       |
| 1,496,332     | SNV            | G            | A             | Francci3_1251 | alkane 1-monooxygenase                                           |                    |                   |                                            |      |      |      | 99.7 |       |        |       |
| 1,501,569     | SNV            | G            | A             | Francci3_1257 | helix-hairpin-helix DNA-binding, class                           |                    | Ala336Thr         |                                            |      |      |      | 71.8 |       |        |       |
| 1,556,650     | SNV            | C            | T             | Francci3_1301 | glycosyl transferase family protein                              |                    |                   |                                            |      |      |      |      | 99.9  |        |       |
| 1,560,110     | SNV            | G            | A             | Francci3_1303 | methyltransferase FkbM                                           |                    |                   |                                            |      |      | 99.9 |      |       |        |       |
| 1,574,610     | SNV            | C            | T             | Francci3_1312 | aconitase                                                        |                    | Ala809Val         | 99.4                                       |      | 84.2 |      |      |       |        |       |
| 1,575,495     | SNV            | C            | T             | Francci3_1313 | inositol-1(or 4)-monophosphatase                                 |                    | Ala198Thr         |                                            |      |      |      |      | 99.8  |        |       |
| 1,579,460     | SNV            | C            | T             | Francci3_1315 | major facilitator transporter                                    |                    |                   |                                            |      |      |      | 99.6 |       |        |       |
| 1,582,403     | SNV            | C            | T             | Francci3_1318 | deoxyuridine 5'-triphosphate nucleotidohydrolase                 |                    |                   |                                            |      |      |      | 99.6 |       |        |       |
| 1,585,174     | SNV            | G            | A             | Francci3_1322 | TrkA-like                                                        |                    |                   | 99.7                                       |      | 81.2 |      |      |       |        |       |
| 1,585,376     | SNV            | G            | A             |               |                                                                  |                    |                   | 99.5                                       |      | 85.0 |      |      |       |        |       |
| 1,585,756     | SNV            | G            | A             | Francci3_1323 | TrkA-like                                                        |                    |                   | 99.8                                       |      | 85.8 |      |      |       |        |       |
| 1,585,964     | SNV            | G            | A             | Francci3_1323 | TrkA-like                                                        |                    | Thr85Ile          | 99.8                                       |      | 79.1 |      |      |       |        |       |
| 1,609,178     | SNV            | C            | T             | Francci3_1340 | inositol monophosphatase                                         |                    | Thr11Ile          |                                            |      |      |      | 99.8 |       |        |       |
| 1,611,095     | SNV            | C            | T             | Francci3_1342 | sulfate adenylyltransferase subunit 1                            |                    | Ser12Phe          |                                            |      |      |      | 99.8 |       |        |       |

Table S2

| Position (nt) | Mutation type* | WT allele            | Mutant allele | Gene ID       | Annotation                                                           | N fixation related | Amino acid change | Reads that called a mutation/all reads (%) |      |      |      |      |       |        |       |
|---------------|----------------|----------------------|---------------|---------------|----------------------------------------------------------------------|--------------------|-------------------|--------------------------------------------|------|------|------|------|-------|--------|-------|
|               |                |                      |               |               |                                                                      |                    |                   | N3H4                                       | N4H4 | N6F4 | N7C9 | N9D9 | N10E6 | G21E10 | G23C4 |
| 1,620,466     | SNV            | C                    | T             | Francci3_1349 | malto-oligosyltrehalose synthase                                     |                    |                   | 99.4                                       |      | 77.8 |      |      |       |        |       |
| 1,645,607     | SNV            | C                    | T             | Francci3_1371 | Holliday junction DNA helicase RuvB                                  |                    | Ala93Val          |                                            |      |      | 99.6 |      |       |        |       |
| 1,649,202     | SNV            | C                    | T             | Francci3_1374 | preprotein translocase subunit SecF                                  |                    |                   |                                            | 99.8 |      | 99.8 | 99.9 | 99.8  | 100    | 100   |
| 1,651,478     | SNV            | C                    | T             | Francci3_1376 | (p)ppGpp synthetase I                                                |                    | His164Tyr         |                                            |      |      | 100  |      |       |        |       |
| 1,679,432     | SNV            | G                    | A             | Francci3_1396 | FAD dependent oxidoreductase                                         |                    |                   |                                            |      |      | 99.7 |      |       |        |       |
| 1,685,555     | SNV            | G                    | A             | Francci3_1399 | hypothetical protein                                                 |                    | Gly154Glu         |                                            |      |      |      |      | 99.7  |        |       |
| 1,707,138     | SNV            | C                    | T             |               |                                                                      |                    |                   | 99.7                                       |      | 84.1 |      |      |       |        |       |
| 1,742,951     | SNV            | G                    | A             | Francci3_1451 | hypothetical protein                                                 |                    | Ala104Thr         |                                            |      |      |      |      | 98.7  |        |       |
| 1,760,667     | SNV            | G                    | A             | Francci3_1468 | FHA domain-containing protein                                        |                    |                   |                                            |      |      | 99.5 |      |       |        |       |
| 1,760,855     | SNV            | G                    | A             | Francci3_1468 | FHA domain-containing protein                                        |                    | Arg146His         |                                            |      |      | 99.6 |      |       |        |       |
| 1,767,739     | SNV            | C                    | T             | Francci3_1475 | cell divisionFtsK/SpoIIIE                                            |                    |                   |                                            |      |      | 99.6 |      |       |        |       |
| 1,769,207     | SNV            | C                    | T             | Francci3_1475 | cell divisionFtsK/SpoIIIE                                            |                    | Arg982Trp         | 99.9                                       |      | 79.8 |      |      |       |        |       |
| 1,801,481     | SNV            | G                    | A             | Francci3_1510 | hypothetical protein                                                 |                    |                   |                                            | 99.2 |      |      |      |       |        |       |
| 1,838,181     | SNV            | C                    | T             | Francci3_1532 | periplasmic binding protein/LacI transcriptional regulator           |                    | Trp38*            |                                            |      |      |      |      | 94.9  |        |       |
| 1,841,263     | SNV            | G                    | A             | Francci3_1535 | ATPase                                                               |                    | Glu373Lys         |                                            |      |      |      |      | 99.7  |        |       |
| 1,841,850     | Deletion       | CGCT<br>GCCG<br>CCGT | -             | Francci3_1535 | ATPase                                                               |                    | Ala569fs          | 50.7                                       |      |      |      |      |       |        |       |
| 1,846,150     | SNV            | G                    | A             | Francci3_1537 | MMPL                                                                 |                    |                   |                                            |      |      | 99.9 |      |       |        |       |
| 1,855,382     | SNV            | G                    | A             | Francci3_1546 | GCN5-related N-acetyltransferase                                     |                    |                   |                                            |      |      | 99.9 |      |       |        |       |
| 1,861,567     | SNV            | C                    | T             | Francci3_1552 | helicase RecD/TraA                                                   |                    | Ser354Phe         |                                            |      |      | 99.8 |      |       |        |       |
| 1,870,125     | Deletion       | G                    | -             |               |                                                                      |                    |                   |                                            | 82.8 |      |      |      | 80.7  |        |       |
| 1,871,157     | SNV            | C                    | T             | Francci3_1560 | putative signal transduction histidine kinase                        |                    | Ala365Thr         |                                            |      |      | 99.6 |      |       |        |       |
| 1,873,160     | SNV            | C                    | T             | Francci3_1561 | 4-hydroxybutyrate coenzyme A transferase                             |                    | Ala270Val         |                                            |      |      | 99.7 |      |       |        |       |
| 1,887,122     | SNV            | G                    | A             | Francci3_1572 | parallel beta-helix repeat-containing                                |                    | Glu240Lys         |                                            |      |      | 99.6 |      |       |        |       |
| 1,888,731     | SNV            | G                    | A             | Francci3_1574 | glycosyl transferase, group 1                                        |                    | Asp56Asn          |                                            |      |      | 99.8 |      |       |        |       |
| 1,889,842     | SNV            | C                    | T             | Francci3_1575 | hypothetical protein                                                 |                    |                   |                                            |      |      | 99.6 |      |       |        |       |
| 1,895,643     | SNV            | C                    | T             | Francci3_1580 | glycosyl transferase family protein                                  |                    |                   |                                            |      |      | 100  |      |       |        |       |
| 1,902,557     | SNV            | G                    | A             | Francci3_1586 | glycosyl transferase family protein                                  |                    | Pro284Ser         |                                            |      |      | 100  |      |       |        |       |
| 1,908,488     | SNV            | A                    | G             | Francci3_1591 | binding-protein-dependent transport systems inner membrane component |                    | Val145Ala         |                                            |      |      |      |      | 99.7  |        |       |
| 1,916,673     | SNV            | G                    | A             | Francci3_1596 | hypothetical protein                                                 |                    |                   |                                            |      |      | 99.9 |      |       |        |       |
| 1,927,074     | SNV            | G                    | A             | Francci3_1605 | cyclopropane-fatty-acyl-phospholipid synthase                        |                    |                   |                                            |      |      | 99.8 |      |       |        |       |
| 1,948,128     | SNV            | C                    | T             |               |                                                                      |                    |                   |                                            |      |      | 99.7 |      |       |        |       |
| 1,957,903     | SNV            | C                    | T             | Francci3_1628 | integral membrane protein TerC                                       |                    | Pro322Ser         |                                            |      |      | 99.2 |      |       |        |       |
| 1,958,226     | SNV            | C                    | T             |               |                                                                      |                    |                   |                                            |      |      | 99.3 |      |       |        |       |

Table S2

| Position (nt) | Mutation type* | WT allele    | Mutant allele | Gene ID       | Annotation                                      | N fixation related | Amino acid change  | Reads that called a mutation/all reads (%) |      |      |      |      |       |        |
|---------------|----------------|--------------|---------------|---------------|-------------------------------------------------|--------------------|--------------------|--------------------------------------------|------|------|------|------|-------|--------|
|               |                |              |               |               |                                                 |                    |                    | N3H4                                       | N4H4 | N6F4 | N7C9 | N9D9 | N10E6 | G21E10 |
| 1,959,540     | SNV            | C            | T             | Francci3_1630 | beta-lactamase-like                             |                    | Ala185Thr          |                                            |      |      | 99.7 |      |       |        |
| 1,968,363     | SNV            | C            | T             | Francci3_1636 | hypothetical protein                            |                    | Ala137Val          |                                            |      |      | 99.7 |      |       |        |
| 1,971,434     | SNV            | C            | T             | Francci3_1638 | phosphoglycerate kinase                         |                    | Thr285Ile          | 99.9                                       |      | 80.5 |      |      |       |        |
| 1,981,040     | SNV            | C            | T             | Francci3_1647 | glucose-6-phosphate 1-                          |                    | Ala182Thr          |                                            |      |      | 99.5 |      |       |        |
| 1,983,469     | SNV            | C            | T             |               |                                                 |                    |                    |                                            |      |      |      | 96.5 |       |        |
| 1,983,670     | SNV            | C            | T             | Francci3_1649 | protoheme IX farnesyltransferase                |                    |                    |                                            |      |      |      | 99.9 |       |        |
| 1,987,548     | SNV            | C            | T             | Francci3_1653 | cytochrome oxidase assembly                     |                    | Gly113Ser          |                                            |      |      |      | 99.8 |       |        |
| 1,991,103     | SNV            | T            | C             | Francci3_1657 | glycerol kinase                                 |                    | Ser414Gly          | 99.8                                       | 99.8 | 100  | 99.8 | 99.8 | 99.9  | 100    |
| 1,994,633     | SNV            | C            | T             | Francci3_1660 | FeS assembly protein SufB                       | yes                |                    |                                            |      | 99.8 |      |      |       |        |
| 2,009,555     | SNV            | G            | A             |               |                                                 |                    |                    | 99.8                                       |      | 82.0 |      |      |       |        |
| 2,018,908     | SNV            | G            | A             | Francci3_1681 | PilT protein-like                               |                    |                    | 99.9                                       |      | 81.1 |      |      |       |        |
| 2,031,399     | SNV            | C            | T             | Francci3_1693 | Type IV secretory pathway VirB4 components-like |                    | Thr228Ile          |                                            |      |      |      | 99.8 |       |        |
| 2,032,785     | SNV            | C            | T             | Francci3_1694 | Type IV secretory pathway VirD4 components-like |                    | Thr49Ile           |                                            |      |      |      |      | 99.7  |        |
| 2,054,984     | SNV            | C            | T             | Francci3_1721 | hypothetical protein                            |                    | Val45Ile           |                                            |      |      |      |      | 99.9  |        |
| 2,059,505     | SNV            | G            | A             |               |                                                 |                    |                    |                                            | 99.8 |      |      |      |       |        |
| 2,061,194     | SNV            | C            | T             | Francci3_1728 | putative transposase                            |                    | Glu398Lys          |                                            |      |      |      |      | 99.4  |        |
| 2,068,072     | SNV            | C            | T             | Francci3_1733 | hypothetical protein                            |                    |                    |                                            |      |      |      | 93.3 |       |        |
| 2,068,408     | SNV            | G            | A             |               |                                                 |                    |                    |                                            |      |      |      | 93.1 |       |        |
| 2,074,164     | SNV            | G            | A             | Francci3_1739 | putative ATP/GTP-binding protein                |                    | Pro215Ser          |                                            |      |      |      | 92.9 |       |        |
| 2,076,720     | SNV            | C            | T             | Francci3_1742 | hypothetical protein                            |                    |                    |                                            | 99.7 |      |      |      |       |        |
| 2,083,118     | SNV            | G            | A             | Francci3_1751 | phosphoribosyltransferase                       |                    |                    |                                            |      | 99.6 |      |      |       |        |
| 2,085,324     | SNV            | G            | A             | Francci3_1753 | radical SAM family protein                      |                    | Thr51Ile           |                                            |      |      |      |      | 99.7  |        |
| 2,088,365     | SNV            | G            | A             | Francci3_1756 | sulfatase                                       |                    | Pro64Ser           |                                            |      |      |      |      | 99.7  |        |
| 2,092,395     | SNV            | C            | T             | Francci3_1761 | DNA topoisomerase II                            |                    | Trp603*            |                                            |      |      | 99.8 |      |       |        |
| 2,092,744     | SNV            | G            | A             | Francci3_1761 | DNA topoisomerase II                            |                    | Ala487Val          |                                            |      |      |      |      | 99.6  |        |
| 2,096,207     | Deletion       | CAGC<br>AGTT | -             | Francci3_1763 | DDE endonuclease                                |                    | Gln56_Leu5<br>8del |                                            |      |      |      |      |       | NA†    |
| 2,096,986     | SNV            | C            | T             | Francci3_1763 | putative transposase                            |                    |                    |                                            |      |      | 100  |      |       |        |
| 2,098,180     | SNV            | G            | A             | Francci3_1764 | transposase, IS4                                |                    |                    |                                            | 97.6 |      |      |      |       |        |
| 2,099,667     | SNV            | G            | A             | Francci3_1765 | sulfatase                                       |                    | Gly27Glu           |                                            |      |      |      |      | 99.9  |        |
| 2,104,142     | SNV            | C            | T             |               |                                                 |                    |                    |                                            |      |      | 99.8 |      |       |        |
| 2,105,062     | SNV            | C            | T             | Francci3_1769 | cytochrome P450                                 |                    |                    |                                            |      |      |      |      | 100   |        |
| 2,107,470     | SNV            | C            | T             | Francci3_1771 | hypothetical protein                            |                    |                    |                                            |      | 99.8 |      |      |       |        |
| 2,108,144     | SNV            | C            | T             | Francci3_1772 | major facilitator transporter                   |                    |                    |                                            |      |      |      |      | 99.6  |        |
| 2,109,159     | SNV            | C            | T             | Francci3_1772 | major facilitator transporter                   |                    | Gly80Asp           |                                            |      |      |      |      | 99.4  |        |
| 2,110,190     | SNV            | C            | T             | Francci3_1773 | UbiE/COQ5 methyltransferase                     |                    | Gly44Asp           |                                            |      | 99.6 |      |      |       |        |
| 2,111,742     | SNV            | G            | A             | Francci3_1775 | radical SAM family protein                      |                    |                    |                                            |      |      |      |      | 99.7  |        |
| 2,111,833     | SNV            | G            | A             | Francci3_1775 | radical SAM family protein                      |                    | Ser258Phe          |                                            |      |      |      |      | 99.9  |        |

Table S2

| Position (nt) | Mutation type* | WT allele | Mutant allele | Gene ID       | Annotation                                  | N fixation related | Amino acid change | Reads that called a mutation/all reads (%) |      |      |      |      |       |        |
|---------------|----------------|-----------|---------------|---------------|---------------------------------------------|--------------------|-------------------|--------------------------------------------|------|------|------|------|-------|--------|
|               |                |           |               |               |                                             |                    |                   | N3H4                                       | N4H4 | N6F4 | N7C9 | N9D9 | N10E6 | G21E10 |
| 2,112,740     | SNV            | T         | C             | Francci3_1776 | transposase, IS4                            |                    |                   |                                            |      |      | 98.9 |      |       |        |
| 2,115,581     | SNV            | C         | T             | Francci3_1778 | transposase                                 |                    | Arg73*            |                                            | 99.9 |      |      |      |       |        |
| 2,117,111     | SNV            | G         | A             | Francci3_1780 | XRE family transcriptional regulator        |                    | Ala55Thr          |                                            |      |      |      | 99.6 |       |        |
| 2,120,403     | SNV            | C         | T             |               |                                             |                    |                   |                                            |      |      | 93.2 |      |       |        |
| 2,124,905     | SNV            | G         | A             | Francci3_1787 | hypothetical protein                        |                    |                   | 99.6                                       |      | 80.1 |      |      |       |        |
| 2,127,527     | SNV            | G         | A             | Francci3_1790 | hypothetical protein                        |                    |                   |                                            |      |      |      | 99.7 |       |        |
| 2,129,673     | SNV            | C         | T             | Francci3_1793 | phosphoesterase PHP-like                    |                    | Gly183Asp         |                                            |      |      |      | 99.7 |       |        |
| 2,130,311     | SNV            | C         | T             |               |                                             |                    |                   |                                            |      |      |      | 99.7 |       |        |
| 2,133,351     | SNV            | C         | T             | Francci3_1798 | hypothetical protein                        |                    |                   |                                            |      |      | 99.6 |      |       |        |
| 2,135,659     | SNV            | C         | T             | Francci3_1801 | aldo/keto reductase                         |                    | Val46Met          |                                            |      |      | 99.7 |      |       |        |
| 2,140,051     | SNV            | C         | T             | Francci3_1805 | hypothetical protein                        |                    | Val340Ile         | 99.5                                       |      | 80.6 |      |      |       |        |
| 2,140,070     | SNV            | C         | T             | Francci3_1805 | hypothetical protein                        |                    |                   |                                            |      |      | 99.6 |      |       |        |
| 2,140,329     | SNV            | C         | T             | Francci3_1805 | hypothetical protein                        |                    | Gly247Asp         | 99.4                                       |      | 80.2 |      |      |       |        |
| 2,141,118     | SNV            | C         | T             | Francci3_1806 | AMP-dependent synthetase and ligase         |                    | Val510Ile         | 99.8                                       |      | 83.2 |      |      |       |        |
| 2,141,644     | SNV            | G         | A             | Francci3_1806 | AMP-dependent synthetase and ligase         |                    |                   |                                            |      |      | 99.8 |      |       |        |
| 2,142,637     | SNV            | G         | A             | Francci3_1806 | AMP-dependent synthetase and ligase         |                    |                   |                                            |      |      | 99.4 |      |       |        |
| 2,145,162     | SNV            | G         | A             | Francci3_1809 | hypothetical protein                        |                    |                   |                                            |      |      |      | 99.8 |       |        |
| 2,146,252     | SNV            | G         | A             | Francci3_1810 | uncharacterized FAD-dependent dehydrogenase |                    | Thr280Ile         |                                            |      |      |      | 99.7 |       |        |
| 2,148,179     | SNV            | G         | A             | Francci3_1811 | NUDIX hydrolase                             |                    |                   |                                            |      |      |      | 99.7 |       |        |
| 2,151,726     | SNV            | C         | T             | Francci3_1816 | flavoprotein                                |                    | Ala100Thr         |                                            |      | 99.8 |      |      |       |        |
| 2,151,925     | SNV            | C         | T             | Francci3_1816 | flavoprotein                                |                    | Trp33*            |                                            |      | 100  |      |      |       |        |
| 2,157,603     | SNV            | C         | T             | Francci3_1821 | lantibiotic dehydratase-like                |                    |                   |                                            |      |      |      | 99.6 |       |        |
| 2,157,772     | SNV            | C         | T             | Francci3_1821 | lantibiotic dehydratase-like                |                    | Pro449Ser         |                                            |      |      |      | 99.5 |       |        |
| 2,158,088     | SNV            | C         | T             | Francci3_1821 | lantibiotic dehydratase-like                |                    | Thr554Ile         |                                            |      |      |      | 99.8 |       |        |
| 2,158,409     | SNV            | C         | T             | Francci3_1821 | lantibiotic dehydratase-like                |                    | Ser661Phe         |                                            |      |      |      | 99.6 |       |        |
| 2,160,900     | SNV            | C         | T             | Francci3_1823 | putative O-methyltransferase                |                    | Ser6Phe           |                                            |      |      |      | 99.9 |       |        |
| 2,162,405     | SNV            | C         | T             | Francci3_1824 | hypothetical protein                        |                    | Thr211Ile         |                                            |      |      |      | 99.8 |       |        |
| 2,162,669     | SNV            | C         | T             | Francci3_1824 | hypothetical protein                        |                    | Ala299Val         |                                            |      |      |      | 99.4 |       |        |
| 2,164,673     | SNV            | G         | A             | Francci3_1827 | hypothetical protein                        |                    |                   |                                            |      |      |      | 99.8 |       |        |
| 2,165,283     | SNV            | G         | A             | Francci3_1827 | hypothetical protein                        |                    | Ala147Val         |                                            |      |      |      | 99.6 |       |        |
| 2,165,920     | SNV            | G         | A             | Francci3_1828 | pterin-4-alpha-carbinolamine                |                    | Ala79Val          |                                            |      |      |      | 99.8 |       |        |
| 2,172,419     | SNV            | G         | A             |               |                                             |                    |                   |                                            |      |      | 99.7 |      |       |        |
| 2,172,421     | SNV            | G         | A             |               |                                             |                    |                   |                                            |      |      | 99.6 |      |       |        |
| 2,185,598     | SNV            | C         | T             |               |                                             |                    |                   | 55.1                                       |      |      |      |      |       |        |
| 2,185,650     | SNV            | G         | A             |               |                                             |                    |                   |                                            |      |      | 99.6 |      |       |        |
| 2,191,397     | SNV            | T         | C             |               |                                             |                    |                   |                                            |      |      |      | 99.7 |       |        |
| 2,196,766     | SNV            | C         | T             | Francci3_1862 | aminotransferase                            |                    | Ala252Val         |                                            |      |      | 99.8 |      |       |        |
| 2,200,738     | SNV            | G         | A             | Francci3_1865 | hypothetical protein                        |                    | Trp10*            | 99.9                                       |      | 82.7 |      |      |       |        |
| 2,222,006     | SNV            | G         | A             | Francci3_1889 | glycoside hydrolase 15-related              |                    | Ala336Val         |                                            |      |      | 99.7 |      |       |        |

Table S2

| Position (nt) | Mutation type* | WT allele | Mutant allele | Gene ID       | Annotation                                                         | N fixation related | Amino acid change | Reads that called a mutation/all reads (%) |      |      |      |      |       |        |
|---------------|----------------|-----------|---------------|---------------|--------------------------------------------------------------------|--------------------|-------------------|--------------------------------------------|------|------|------|------|-------|--------|
|               |                |           |               |               |                                                                    |                    |                   | N3H4                                       | N4H4 | N6F4 | N7C9 | N9D9 | N10E6 | G21E10 |
| 2,222,507     | SNV            | G         | A             | Francci3_1889 | glycoside hydrolase 15-related                                     |                    | Ala169Val         |                                            |      |      |      | 99.7 |       |        |
| 2,222,909     | SNV            | T         | C             | Francci3_1889 | glycoside hydrolase 15-related                                     |                    | Asp35Gly          |                                            |      |      |      | 99.9 |       |        |
| 2,228,466     | SNV            | C         | T             | Francci3_1895 | pyruvate dehydrogenase complex dehydrogenase (E1) component-like   |                    | Val508Met         |                                            |      |      |      | 99.8 |       |        |
| 2,231,615     | SNV            | G         | A             | Francci3_1898 | cation diffusion facilitator family                                |                    |                   |                                            |      |      |      | 99.9 |       |        |
| 2,236,684     | SNV            | G         | A             | Francci3_1903 | hypothetical protein                                               |                    | Gly108Glu         |                                            |      |      |      | 99.9 |       |        |
| 2,238,991     | SNV            | G         | A             | Francci3_1906 | glycosyl transferase, group 1                                      |                    | Pro257Ser         |                                            |      |      |      | 99.8 |       |        |
| 2,241,256     | SNV            | G         | A             |               |                                                                    |                    |                   |                                            |      |      |      | 99.9 |       |        |
| 2,241,309     | SNV            | G         | A             |               |                                                                    |                    |                   |                                            |      |      |      | 99.7 |       |        |
| 2,241,835     | SNV            | G         | A             |               |                                                                    |                    |                   |                                            |      |      |      | 99.6 |       |        |
| 2,242,307     | SNV            | G         | A             | Francci3_1909 | hypothetical protein                                               |                    |                   |                                            |      |      |      | 99.9 |       |        |
| 2,242,698     | SNV            | G         | A             | Francci3_1909 | hypothetical protein                                               |                    | Asp282Asn         |                                            |      |      |      | 99.6 |       |        |
| 2,242,854     | SNV            | G         | A             | Francci3_1910 | urate oxidase                                                      |                    |                   |                                            |      |      |      | 99.8 |       |        |
| 2,243,560     | SNV            | G         | A             | Francci3_1910 | urate oxidase                                                      |                    | Ala45Val          |                                            |      |      |      | 100  |       |        |
| 2,244,799     | SNV            | G         | A             | Francci3_1911 | ErfK/YbiS/YcfS/YnhG                                                |                    | Ala125Thr         |                                            |      |      |      | 99.7 |       |        |
| 2,245,123     | SNV            | C         | T             | Francci3_1911 | ErfK/YbiS/YcfS/YnhG                                                |                    | Pro233Ser         |                                            |      | 99.6 |      |      |       |        |
| 2,246,290     | SNV            | G         | A             | Francci3_1912 | hypothetical protein                                               |                    | Val16Ile          |                                            |      |      |      | 99.6 |       |        |
| 2,247,357     | SNV            | G         | A             |               |                                                                    |                    |                   |                                            |      |      |      | 100  |       |        |
| 2,248,135     | SNV            | G         | A             | Francci3_1913 | OmpA/MotB                                                          |                    |                   |                                            |      |      |      | 99.7 |       |        |
| 2,249,777     | SNV            | G         | A             | Francci3_1915 | hypothetical protein                                               |                    |                   |                                            |      |      |      | 99.9 |       |        |
| 2,251,330     | SNV            | G         | A             | Francci3_1917 | GntR family transcriptional regulator                              |                    | Pro217Leu         |                                            |      |      |      | 94.8 |       |        |
| 2,251,686     | SNV            | G         | A             | Francci3_1917 | GntR family transcriptional regulator                              |                    |                   |                                            |      |      |      | 99.4 |       |        |
| 2,255,617     | SNV            | C         | T             | Francci3_1919 | LysR family transcriptional regulator                              |                    | Ala26Val          |                                            |      |      |      | 99.8 |       |        |
| 2,258,306     | SNV            | C         | T             | Francci3_1922 | transposase IS66                                                   |                    | Ala484Thr         |                                            |      |      |      | 98.6 |       |        |
| 2,258,584     | SNV            | G         | A             | Francci3_1922 | transposase IS66                                                   |                    | Ala391Val         |                                            |      |      |      | 97.5 |       |        |
| 2,260,519     | SNV            | A         | G             | Francci3_1923 | FAD dependent oxidoreductase                                       |                    | Ser531Pro         |                                            |      |      |      | 99.9 |       |        |
| 2,261,396     | SNV            | C         | T             | Francci3_1923 | FAD dependent oxidoreductase                                       |                    |                   |                                            |      |      |      | 99.9 |       |        |
| 2,261,574     | SNV            | G         | A             | Francci3_1923 | FAD dependent oxidoreductase                                       |                    | Ala179Val         |                                            |      |      |      | 99.8 |       |        |
| 2,262,193     | SNV            | G         | A             |               |                                                                    |                    |                   |                                            |      |      |      | 99.7 |       |        |
| 2,262,325     | SNV            | C         | T             |               |                                                                    |                    |                   |                                            |      |      |      | 99.7 |       |        |
| 2,262,814     | SNV            | G         | A             | Francci3_1924 | hypothetical protein                                               |                    | Val135Met         |                                            |      |      |      | 99.5 |       |        |
| 2,262,939     | SNV            | G         | A             | Francci3_1924 | hypothetical protein                                               |                    |                   |                                            |      |      |      | 99.8 |       |        |
| 2,263,129     | SNV            | C         | T             | Francci3_1924 | hypothetical protein                                               |                    | Leu240Phe         |                                            |      |      |      | 99.4 |       |        |
| 2,266,613     | SNV            | C         | T             | Francci3_1929 | AMP-dependent synthetase and ligase                                |                    | Gly575Glu         |                                            |      |      |      | 99.6 |       |        |
| 2,268,156     | SNV            | G         | A             | Francci3_1929 | AMP-dependent synthetase and ligase                                |                    | Pro61Ser          |                                            |      |      |      | 99.7 |       |        |
| 2,268,296     | SNV            | G         | A             | Francci3_1929 | AMP-dependent synthetase and ligase                                |                    | Ala14Val          |                                            |      |      |      | 99.4 |       |        |
| 2,269,076     | SNV            | G         | A             | Francci3_1930 | cytochrome P450                                                    |                    | Ala12Thr          |                                            |      |      |      | 99.5 |       |        |
| 2,269,696     | SNV            | C         | T             | Francci3_1930 | cytochrome P450                                                    |                    |                   |                                            |      |      |      | 89.9 |       |        |
| 2,282,841     | SNV            | G         | A             | Francci3_1942 | uptake hydrogenase large subunit (Hydrogenlase) (hupL1). FRAAL2393 | yes                | Arg448His         |                                            |      | 99.7 |      |      |       |        |

Table S2

| Position (nt) | Mutation type* | WT allele                   | Mutant allele | Gene ID       | Annotation                                                                              | N fixation related | Amino acid change | Reads that called a mutation/all reads (%) |      |      |      |      |       |        |       |
|---------------|----------------|-----------------------------|---------------|---------------|-----------------------------------------------------------------------------------------|--------------------|-------------------|--------------------------------------------|------|------|------|------|-------|--------|-------|
|               |                |                             |               |               |                                                                                         |                    |                   | N3H4                                       | N4H4 | N6F4 | N7C9 | N9D9 | N10E6 | G21E10 | G23C4 |
| 2,290,151     | SNV            | C                           | T             |               |                                                                                         |                    |                   |                                            |      |      |      |      | 99.8  |        |       |
| 2,290,652     | SNV            | C                           | T             | Francci3_1949 | cold-shock DNA-binding protein family protein                                           |                    | Pro20Leu          |                                            |      |      |      |      | 99.8  |        |       |
| 2,304,604     | SNV            | G                           | A             | Francci3_1962 | transposase, IS4                                                                        |                    |                   | 99.3                                       |      | 58.4 |      |      |       |        |       |
| 2,329,076     | SNV            | G                           | A             | Francci3_1983 | D-lactate dehydrogenase                                                                 |                    |                   | 99.8                                       |      | 84.6 |      |      |       |        |       |
| 2,330,578     | SNV            | G                           | A             | Francci3_1983 | D-lactate dehydrogenase                                                                 |                    | Trp789*           |                                            |      |      |      |      | 99.8  |        |       |
| 2,337,453     | SNV            | C                           | T             | Francci3_1989 | putative PAS/PAC sensor protein                                                         |                    | Gly252Asp         | 99.5                                       |      | 79.4 |      |      |       |        |       |
| 2,340,301     | SNV            | G                           | A             | Francci3_1990 | metallophosphoesterase                                                                  |                    | Pro96Ser          |                                            |      |      |      |      | 99.8  |        |       |
| 2,344,405     | SNV            | C                           | T             | Francci3_1994 | phytanoyl-CoA dioxygenase                                                               |                    |                   |                                            |      |      |      |      |       | 99.7   |       |
| 2,344,488     | SNV            | C                           | T             | Francci3_1995 | hypothetical protein                                                                    |                    |                   |                                            |      |      |      |      |       | 99.6   |       |
| 2,351,531     | SNV            | C                           | T             | Francci3_2001 | homoserine O-succinyltransferase                                                        |                    | Asp51Asn          |                                            |      |      |      |      |       | 99.8   |       |
| 2,354,935     | SNV            | C                           | T             |               |                                                                                         |                    |                   |                                            |      |      |      |      |       | 99.8   |       |
| 2,355,723     | SNV            | C                           | T             | Francci3_2006 | antibiotic biosynthesis                                                                 |                    | Glu100Lys         |                                            |      |      |      |      |       | 99.8   |       |
| 2,357,873     | SNV            | C                           | T             | Francci3_2007 | FAD linked oxidase-like                                                                 |                    | Pro511Ser         |                                            |      |      |      |      |       | 99.8   |       |
| 2,357,916     | SNV            | C                           | T             | Francci3_2007 | FAD linked oxidase-like                                                                 |                    | Pro525Leu         |                                            |      |      |      |      |       | 99.8   |       |
| 2,359,193     | SNV            | C                           | T             | Francci3_2007 | FAD linked oxidase-like                                                                 |                    | Pro951Ser         |                                            |      |      |      |      |       | 99.8   |       |
| 2,361,585     | SNV            | G                           | A             | Francci3_2009 | cytochrome-c oxidase                                                                    |                    |                   |                                            |      |      |      |      |       | 100    |       |
| 2,362,144     | SNV            | G                           | A             |               |                                                                                         |                    |                   |                                            |      |      |      |      |       | 99.8   |       |
| 2,362,685     | SNV            | G                           | A             | Francci3_2011 | hypothetical protein                                                                    |                    | Arg6Gln           |                                            |      |      |      |      |       | 99.8   |       |
| 2,366,992     | Deletion       | GCGA<br>CCGC<br>CCGG<br>GAC | -             | Francci3_2015 | MarR family transcriptional regulator                                                   |                    | Thr23_Ala27 del   | 50.5                                       | 56.4 | 57.9 | 54.7 | 54.4 | 54.9  |        |       |
| 2,403,991     | SNV            | C                           | T             | Francci3_2043 | 2-polyprenyl-6-methoxyphenol hydroxylase and related FAD-dependent oxidoreductases-like |                    | Ala463Thr         |                                            |      |      | 99.8 |      |       |        |       |
| 2,419,643     | SNV            | C                           | T             | Francci3_2055 | haloacid dehalogenase-like hydrolase                                                    |                    | Ala167Val         |                                            |      |      |      |      | 99.7  |        |       |
| 2,447,331     | SNV            | C                           | T             |               |                                                                                         |                    |                   |                                            | 99.1 |      |      |      |       |        |       |
| 2,447,877     | SNV            | A                           | G             | Francci3_2080 | transposase, IS4                                                                        |                    |                   |                                            | 100  |      |      |      |       |        |       |
| 2,456,458     | SNV            | C                           | T             | Francci3_2088 | recombinase                                                                             |                    | Ala463Val         | 99.4                                       |      | 80.8 |      |      |       |        |       |
| 2,457,794     | SNV            | C                           | T             | Francci3_2089 | hypothetical protein                                                                    |                    | Gly3Glu           |                                            |      |      |      |      | 99.5  |        |       |
| 2,462,707     | SNV            | C                           | T             | Francci3_2095 | putative 3-oxoacyl-ACP synthase III                                                     |                    |                   | 50.3                                       |      |      |      |      |       |        |       |
| 2,484,710     | SNV            | C                           | T             | Francci3_2118 | oligopeptide/dipeptide ABC transporter, ATP-binding protein-like                        |                    | Ala131Val         | 99.6                                       |      | 82.8 |      |      |       |        |       |
| 2,484,730     | SNV            | C                           | T             | Francci3_2118 | oligopeptide/dipeptide ABC transporter, ATP-binding protein-like                        |                    | Arg138Trp         |                                            |      |      | 99.4 |      |       |        |       |
| 2,485,067     | SNV            | G                           | A             | Francci3_2118 | oligopeptide/dipeptide ABC transporter, ATP-binding protein-like                        |                    | Gly250Asp         |                                            |      |      |      |      | 99.3  |        |       |
| 2,485,624     | SNV            | C                           | T             | Francci3_2118 | oligopeptide/dipeptide ABC transporter, ATP-binding protein-like                        |                    | Pro436Ser         | 99.8                                       |      | 79.8 |      |      |       |        |       |

Table S2

| Position (nt) | Mutation type* | WT allele | Mutant allele | Gene ID       | Annotation                                              | N fixation related | Amino acid change | Reads that called a mutation/all reads (%) |      |      |      |      |       |        |
|---------------|----------------|-----------|---------------|---------------|---------------------------------------------------------|--------------------|-------------------|--------------------------------------------|------|------|------|------|-------|--------|
|               |                |           |               |               |                                                         |                    |                   | N3H4                                       | N4H4 | N6F4 | N7C9 | N9D9 | N10E6 | G21E10 |
| 2,489,356     | SNV            | G         | A             |               |                                                         |                    |                   |                                            | 99.8 |      |      |      |       |        |
| 2,489,470     | SNV            | G         | A             |               |                                                         |                    |                   |                                            |      | 99.5 |      |      |       |        |
| 2,509,415     | SNV            | G         | A             | Francci3_2140 | hypothetical protein                                    |                    | Val216Ile         |                                            |      |      |      | 99.8 |       |        |
| 2,511,085     | SNV            | G         | A             |               |                                                         |                    |                   |                                            |      | 99.9 |      |      |       |        |
| 2,515,210     | SNV            | G         | A             | Francci3_2147 | phage integrase                                         |                    |                   |                                            |      |      |      | 100  |       |        |
| 2,515,738     | SNV            | C         | T             | Francci3_2148 | hypothetical protein                                    |                    | Pro102Ser         |                                            |      | 99.3 |      |      |       |        |
| 2,518,868     | SNV            | G         | A             | Francci3_2150 | IS630 family transposase                                |                    | Ala85Val          |                                            |      |      |      | 99.9 |       |        |
| 2,522,063     | SNV            | G         | A             | Francci3_2153 | response regulator receiver protein                     |                    | Ala161Val         |                                            |      |      | 99.6 |      |       |        |
| 2,523,025     | SNV            | G         | A             | Francci3_2154 | periplasmic sensor signal transduction histidine kinase |                    | Ser412Phe         |                                            |      |      |      | 100  |       |        |
| 2,523,735     | SNV            | G         | A             | Francci3_2154 | periplasmic sensor signal transduction histidine kinase |                    |                   |                                            |      |      | 99.7 |      |       |        |
| 2,525,546     | SNV            | G         | A             | Francci3_2156 | phosphonate ABC transporter ATP-                        |                    |                   |                                            | 99.9 |      |      |      |       |        |
| 2,528,383     | SNV            | G         | A             |               |                                                         |                    |                   |                                            |      |      |      | 99.9 |       |        |
| 2,529,681     | SNV            | G         | A             | Francci3_2160 | hypothetical protein                                    |                    |                   |                                            |      |      |      | 99.8 |       |        |
| 2,529,854     | SNV            | G         | A             | Francci3_2160 | hypothetical protein                                    |                    | Ser70Asn          |                                            |      |      |      | 99.7 |       |        |
| 2,531,506     | SNV            | G         | A             |               |                                                         |                    |                   |                                            |      |      | 99.5 |      |       |        |
| 2,531,592     | SNV            | G         | A             |               |                                                         |                    |                   |                                            |      |      |      | 99.9 |       |        |
| 2,531,805     | SNV            | G         | A             |               |                                                         |                    |                   |                                            |      |      |      | 99.8 |       |        |
| 2,533,010     | SNV            | G         | A             | Francci3_2163 | short-chain dehydrogenase/reductase                     |                    | Ala156Thr         |                                            |      |      |      | 99.6 |       |        |
| 2,533,852     | SNV            | C         | T             | Francci3_2164 | LacI family transcription regulator                     |                    | Gly257Asp         |                                            | 99.8 |      |      |      |       |        |
| 2,534,154     | SNV            | G         | A             | Francci3_2164 | LacI family transcription regulator                     |                    |                   |                                            |      |      |      | 99.9 |       |        |
| 2,537,454     | SNV            | G         | A             | Francci3_2166 | citrate lyase                                           |                    | Val122Met         |                                            |      |      |      | 100  |       |        |
| 2,544,814     | SNV            | G         | A             | Francci3_2172 | GrpE protein                                            |                    | Ala117Val         |                                            |      |      |      | 99.8 |       |        |
| 2,546,271     | SNV            | G         | A             | Francci3_2173 | molecular chaperone DnaK                                |                    | Ala281Val         |                                            |      |      |      | 99.9 |       |        |
| 2,548,147     | SNV            | G         | A             | Francci3_2174 | heat shock protein Hsp20                                |                    | Gly160Asp         |                                            |      |      |      | 99.6 |       |        |
| 2,555,545     | SNV            | C         | T             | Francci3_2181 | cobyrinic acid a,c-diamide synthase                     |                    |                   |                                            |      | 99.6 |      |      |       |        |
| 2,555,992     | SNV            | C         | T             | Francci3_2181 | cobyrinic acid a,c-diamide synthase                     |                    |                   |                                            |      | 99.6 |      |      |       |        |
| 2,567,471     | SNV            | G         | A             | Francci3_2196 | hypothetical protein                                    |                    |                   |                                            |      |      | 99.9 |      |       |        |
| 2,568,407     | SNV            | C         | T             | Francci3_2196 | hypothetical protein                                    |                    |                   |                                            |      |      | 99.8 |      |       |        |
| 2,568,550     | SNV            | C         | T             |               |                                                         |                    |                   |                                            |      |      | 99.4 |      |       |        |
| 2,569,339     | SNV            | C         | T             | Francci3_2197 | RNA-directed DNA polymerase                             |                    | Pro33Leu          |                                            | 99.9 |      |      |      |       |        |
| 2,569,614     | SNV            | C         | T             | Francci3_2197 | RNA-directed DNA polymerase                             |                    | Arg125Cys         |                                            |      |      | 99.3 |      |       |        |
| 2,570,025     | SNV            | G         | A             | Francci3_2197 | RNA-directed DNA polymerase                             |                    | Ala262Thr         |                                            |      |      |      | 99.7 |       |        |
| 2,570,559     | SNV            | C         | T             | Francci3_2197 | RNA-directed DNA polymerase                             |                    | Pro440Ser         |                                            |      |      |      | 99.7 |       |        |
| 2,570,919     | SNV            | G         | A             | Francci3_2198 | hypothetical protein                                    |                    | Ala45Thr          |                                            |      |      | 99.8 |      |       |        |
| 2,572,419     | SNV            | C         | T             | Francci3_2199 | epoxide hydrolase-like                                  |                    | Ala10Thr          |                                            |      |      | 99.7 |      |       |        |
| 2,574,164     | SNV            | G         | A             | Francci3_2202 | hypothetical protein                                    |                    | Trp32*            |                                            |      |      | 99.8 |      |       |        |



Table S2

| Position (nt) | Mutation type* | WT allele | Mutant allele | Gene ID       | Annotation                                                    | N fixation related | Amino acid change | Reads that called a mutation/all reads (%) |      |      |      |      |       |         |
|---------------|----------------|-----------|---------------|---------------|---------------------------------------------------------------|--------------------|-------------------|--------------------------------------------|------|------|------|------|-------|---------|
|               |                |           |               |               |                                                               |                    |                   | N3H4                                       | N4H4 | N6F4 | N7C9 | N9D9 | N10E6 | G21E10  |
| 2,574,401     | SNV            | G         | A             | Francci3_2202 | hypothetical protein                                          |                    |                   |                                            |      |      |      | 99.4 |       |         |
| 2,590,719     | Insertion      | -         | GGGG<br>TAGC  |               |                                                               |                    |                   |                                            | 71.6 |      | 72.9 | 71.9 | 70.0  | NA† NA† |
| 2,593,217     | SNV            | G         | A             | Francci3_2218 | hypothetical protein                                          |                    | Val22Ile          |                                            |      |      | 99.6 |      |       |         |
| 2,596,567     | SNV            | G         | A             | Francci3_2222 | HNH endonuclease                                              |                    |                   |                                            |      |      | 99.9 |      |       |         |
| 2,600,163     | SNV            | G         | A             | Francci3_2226 | GCN5-related N-acetyltransferase                              |                    | Thr12Met          |                                            |      |      | 99.9 |      |       |         |
| 2,630,292     | SNV            | G         | A             | Francci3_2252 | extracellular solute-binding protein                          |                    |                   | 99.7                                       |      | 77.9 |      |      |       |         |
| 2,637,427     | SNV            | G         | A             | Francci3_2258 | two component LuxR family transcriptional regulator           |                    |                   |                                            |      |      | 99.7 |      |       |         |
| 2,644,346     | SNV            | C         | T             | Francci3_2264 | resolvase-like protein                                        |                    |                   |                                            |      |      | 99.5 |      |       |         |
| 2,647,733     | SNV            | C         | T             | Francci3_2270 | hypothetical protein                                          |                    |                   |                                            |      |      |      | 99.0 |       |         |
| 2,649,580     | SNV            | G         | A             | Francci3_2272 | apolipoprotein N-acyltransferase                              |                    | Ala381Val         | 99.9                                       |      | 86.8 |      |      |       |         |
| 2,650,276     | SNV            | G         | A             | Francci3_2272 | apolipoprotein N-acyltransferase                              |                    | Pro149Leu         | 99.6                                       |      | 79.6 |      |      |       |         |
| 2,650,791     | SNV            | C         | T             |               |                                                               |                    |                   |                                            |      |      |      | 98.4 |       |         |
| 2,658,088     | SNV            | A         | G             | Francci3_2277 | zinc-binding alcohol dehydrogenase                            |                    | Thr379Ala         |                                            |      |      |      | 100  |       |         |
| 2,658,886     | SNV            | C         | T             | Francci3_2278 | hypothetical protein                                          |                    |                   |                                            |      |      |      | 99.8 |       |         |
| 2,659,711     | SNV            | C         | T             | Francci3_2278 | hypothetical protein                                          |                    |                   |                                            |      |      | 99.6 |      |       |         |
| 2,665,131     | SNV            | G         | A             | Francci3_2285 | hypothetical protein                                          |                    |                   |                                            |      |      |      | 99.6 |       |         |
| 2,666,307     | SNV            | G         | A             |               |                                                               |                    |                   |                                            |      |      |      | 99.8 |       |         |
| 2,666,319     | SNV            | G         | A             |               |                                                               |                    |                   |                                            |      |      |      | 99.5 |       |         |
| 2,670,596     | SNV            | G         | A             | Francci3_2289 | major facilitator transporter                                 |                    | Pro223Ser         |                                            |      |      |      | 99.7 |       |         |
| 2,670,761     | SNV            | C         | T             | Francci3_2289 | major facilitator transporter                                 |                    | Ala168Thr         |                                            |      |      |      | 99.6 |       |         |
| 2,670,904     | SNV            | C         | T             | Francci3_2289 | major facilitator transporter                                 |                    | Gly120Asp         |                                            |      |      |      | 99.7 |       |         |
| 2,672,757     | SNV            | G         | A             |               |                                                               |                    |                   | 50.7                                       |      |      |      |      |       |         |
| 2,674,349     | SNV            | G         | A             | Francci3_2294 | monooxygenase, FAD-binding                                    |                    |                   |                                            |      |      |      | 99.8 |       |         |
| 2,674,693     | SNV            | C         | T             | Francci3_2295 | lignostilbene-alpha beta-dioxygenase and related enzymes-like |                    | Gly550Glu         |                                            |      |      |      | 99.8 |       |         |
| 2,682,691     | SNV            | G         | A             | Francci3_2300 | pentapeptide repeat-containing protein                        |                    |                   |                                            |      |      |      | 99.7 |       |         |
| 2,687,044     | SNV            | C         | T             |               |                                                               |                    |                   |                                            |      |      | 99.6 |      |       |         |
| 2,694,931     | SNV            | G         | A             |               |                                                               |                    |                   |                                            |      |      |      | 99.8 |       |         |
| 2,726,353     | SNV            | G         | A             | Francci3_2352 | hypothetical protein                                          |                    | Ala503Val         |                                            |      |      |      | 99.8 |       |         |
| 2,735,510     | SNV            | G         | A             | Francci3_2361 | hypothetical protein                                          |                    | Ala577Val         |                                            |      |      | 99.0 |      |       |         |
| 2,741,567     | SNV            | C         | T             | Francci3_2367 | transposase Tn3                                               |                    |                   |                                            | 99.9 |      |      |      |       |         |
| 2,745,115     | SNV            | G         | A             |               |                                                               |                    |                   |                                            |      | 99.6 |      |      |       |         |
| 2,763,949     | SNV            | C         | T             | Francci3_2388 | hypothetical protein                                          |                    | Arg354Gln         | 52.5                                       |      |      |      |      |       |         |
| 2,780,773     | SNV            | C         | T             | Francci3_2401 | two component transcriptional                                 |                    | Gly111Glu         |                                            | 77.8 |      |      |      |       |         |
| 2,814,916     | SNV            | G         | A             | Francci3_2423 | extracellular solute-binding protein                          |                    |                   |                                            |      | 99.6 |      |      |       |         |
| 2,820,312     | SNV            | G         | A             | Francci3_2427 | cysteine synthase                                             |                    | Pro95Ser          |                                            |      |      |      | 99.8 |       |         |
| 2,828,659     | SNV            | C         | T             |               |                                                               |                    |                   |                                            |      |      |      |      | 100   |         |
| 2,847,828     | SNV            | C         | T             | Francci3_2450 | amino acid adenylation                                        |                    | Ala3716Thr        |                                            |      |      | 83.8 |      |       |         |

Table S2

| Position (nt) | Mutation type* | WT allele            | Mutant allele | Gene ID       | Annotation                         | N fixation related | Amino acid change | Reads that called a mutation/all reads (%) |      |      |      |      |       |        |       |
|---------------|----------------|----------------------|---------------|---------------|------------------------------------|--------------------|-------------------|--------------------------------------------|------|------|------|------|-------|--------|-------|
|               |                |                      |               |               |                                    |                    |                   | N3H4                                       | N4H4 | N6F4 | N7C9 | N9D9 | N10E6 | G21E10 | G23C4 |
| 2,855,357     | SNV            | T                    | C             | Francci3_2450 | amino acid adenylation             |                    | Glu1206Gly        |                                            |      |      |      |      | 80.0  |        |       |
| 2,855,359     | SNV            | G                    | C             | Francci3_2450 | amino acid adenylation             |                    |                   |                                            |      |      |      |      | 80.0  |        |       |
| 2,886,853     | SNV            | C                    | T             | Francci3_2460 | amino acid adenylation             |                    | Val434Ile         |                                            |      |      |      |      | 99.9  |        |       |
| 2,892,325     | SNV            | C                    | T             | Francci3_2461 | amino acid adenylation             |                    | Trp3215*          | 99.3                                       |      | 84.4 |      |      |       |        |       |
| 2,895,966     | SNV            | A                    | C             | Francci3_2461 | amino acid adenylation             |                    | Trp2002Gly        |                                            |      | 47.9 |      |      |       |        |       |
| 2,898,345     | SNV            | C                    | T             | Francci3_2461 | amino acid adenylation             |                    | Ala1209Thr        | 97.2                                       |      | 81.6 |      |      |       |        |       |
| 2,902,343     | SNV            | C                    | T             | Francci3_2462 | ABC transporter related            |                    |                   | 99.7                                       |      | 83.0 |      |      |       |        |       |
| 2,902,897     | SNV            | G                    | A             | Francci3_2462 | ABC transporter related            |                    | Leu346Phe         |                                            |      |      |      | 87.9 |       |        |       |
| 2,914,160     | SNV            | G                    | A             | Francci3_2468 | carbon starvation protein CstA     |                    | Ala201Val         | 99.9                                       |      | 83.3 |      |      |       |        |       |
| 2,915,638     | Deletion       | CTGG<br>AAT          | -             |               |                                    |                    |                   |                                            |      |      | 99.1 | 99.6 |       |        |       |
| 2,916,240     | SNV            | G                    | A             | Francci3_2471 | Na+/solute symporter               |                    |                   |                                            |      |      |      | 99.9 |       |        |       |
| 2,925,962     | SNV            | T                    | C             | Francci3_2481 | transposase, IS4                   |                    |                   |                                            | 98.5 |      | 99.3 | 95.3 | 97.3  |        |       |
| 2,928,108     | SNV            | G                    | A             |               |                                    |                    |                   |                                            | 99.8 |      |      |      |       |        |       |
| 2,936,221     | SNV            | G                    | A             |               |                                    |                    |                   |                                            | 99.5 |      |      |      |       |        |       |
| 2,947,154     | SNV            | T                    | C             | Francci3_2496 | radical SAM family protein         |                    | Leu301Pro         |                                            | 99.8 |      |      |      |       |        |       |
| 2,960,274     | SNV            | G                    | A             | Francci3_2507 | 5-oxoprolinase (ATP-hydrolyzing)   |                    | Thr569Ile         |                                            |      |      |      |      | 99.9  |        |       |
| 2,974,730     | SNV            | G                    | A             | Francci3_2518 | methane/phenol/toluene hydroxylase |                    |                   |                                            | 99.8 |      |      |      |       |        |       |
| 2,976,478     | SNV            | T                    | C             | Francci3_2519 | oxidoreductase FAD-binding region  |                    |                   |                                            |      |      |      |      | 100   |        |       |
| 2,980,116     | SNV            | G                    | A             | Francci3_2522 | transposase IS66                   |                    |                   |                                            | 96.6 |      |      |      |       |        |       |
| 2,982,200     | SNV            | C                    | T             |               |                                    |                    |                   | 99.9                                       |      | 81.6 |      |      |       |        |       |
| 2,985,499     | SNV            | G                    | A             |               |                                    |                    |                   |                                            |      |      |      |      | 99.8  |        |       |
| 2,988,114     | SNV            | G                    | A             |               |                                    |                    |                   | 99.7                                       |      | 81.7 |      |      |       |        |       |
| 2,989,076     | SNV            | C                    | T             | Francci3_2527 | NAD-dependent                      |                    | Arg107Cys         |                                            |      | 99.5 |      |      |       |        |       |
| 2,992,228     | SNV            | G                    | A             | Francci3_2529 | recombinase                        |                    | Pro12Ser          |                                            |      |      |      |      | 99.7  |        |       |
| 2,998,098     | SNV            | G                    | A             | Francci3_2534 | transposase, IS4                   |                    |                   |                                            |      |      |      |      | 99.3  |        |       |
| 3,001,372     | SNV            | G                    | A             | Francci3_2537 | alpha/beta hydrolase fold          |                    |                   |                                            |      |      |      |      | 99.8  |        |       |
| 3,007,272     | SNV            | G                    | A             | Francci3_2544 | hypothetical protein               |                    | Asp170Asn         |                                            |      |      |      |      | 99.4  |        |       |
| 3,007,508     | SNV            | G                    | A             |               |                                    |                    |                   |                                            |      |      |      |      | 99.7  |        |       |
| 3,008,143     | SNV            | G                    | A             | Francci3_2545 | PfkB                               |                    | Leu106Phe         |                                            |      |      |      |      | 99.8  |        |       |
| 3,008,193     | SNV            | G                    | A             | Francci3_2545 | PfkB                               |                    | Thr89Ile          |                                            |      |      |      |      | 99.6  |        |       |
| 3,010,769     | SNV            | G                    | A             |               |                                    |                    |                   |                                            |      |      |      |      | 99.7  |        |       |
| 3,010,817     | SNV            | G                    | A             |               |                                    |                    |                   |                                            |      |      |      |      | 99.9  |        |       |
| 3,013,452     | SNV            | C                    | T             | Francci3_2550 | hypothetical protein               |                    | Ser76Phe          |                                            |      |      |      | 99.7 |       |        |       |
| 3,014,419     | SNV            | G                    | A             |               |                                    |                    |                   |                                            |      |      |      |      | 99.7  |        |       |
| 3,019,475     | Deletion       | ATGG<br>CGGG<br>ACGC | -             |               |                                    |                    |                   |                                            |      |      |      | 61.6 |       |        |       |
| 3,021,492     | SNV            | C                    | T             | Francci3_2560 | hypothetical protein               |                    | Ala43Val          |                                            |      |      |      |      | 99.7  |        |       |
| 3,031,508     | SNV            | G                    | A             | Francci3_2572 | hypothetical protein               |                    |                   |                                            |      | 99.3 |      |      |       |        |       |

Table S2

| Position (nt) | Mutation type* | WT allele | Mutant allele | Gene ID       | Annotation                                             | N fixation related | Amino acid change | Reads that called a mutation/all reads (%) |      |      |      |      |       |        |
|---------------|----------------|-----------|---------------|---------------|--------------------------------------------------------|--------------------|-------------------|--------------------------------------------|------|------|------|------|-------|--------|
|               |                |           |               |               |                                                        |                    |                   | N3H4                                       | N4H4 | N6F4 | N7C9 | N9D9 | N10E6 | G21E10 |
| 3,038,290     | SNV            | C         | T             | Francci3_2575 | hypothetical protein                                   |                    |                   |                                            |      |      |      | 99.9 |       |        |
| 3,052,873     | SNV            | C         | T             | Francci3_2589 | hypothetical protein                                   |                    |                   |                                            |      |      |      | 99.6 |       |        |
| 3,055,005     | SNV            | C         | T             | Francci3_2590 | putative phosphoesterase                               |                    | Ala432Thr         |                                            |      |      |      | 99.8 |       |        |
| 3,057,112     | SNV            | C         | T             | Francci3_2591 | Dyp-type peroxidase                                    |                    | Val319Ile         |                                            |      |      |      | 99.8 |       |        |
| 3,057,641     | SNV            | C         | T             | Francci3_2591 | Dyp-type peroxidase                                    |                    |                   |                                            |      |      |      | 100  |       |        |
| 3,058,077     | SNV            | C         | T             |               |                                                        |                    |                   |                                            |      |      |      | 99.9 |       |        |
| 3,058,273     | SNV            | C         | T             |               |                                                        |                    |                   |                                            |      |      |      | 99.8 |       |        |
| 3,059,768     | SNV            | C         | T             | Francci3_2592 | monooxygenase, FAD-binding                             |                    |                   |                                            |      |      |      | 99.9 |       |        |
| 3,060,926     | SNV            | C         | T             | Francci3_2594 | TetR family transcriptional regulator                  |                    |                   | 99.9                                       |      | 83.7 |      |      |       |        |
| 3,062,894     | SNV            | C         | T             |               |                                                        |                    |                   |                                            |      |      | 87.7 |      |       |        |
| 3,069,424     | SNV            | G         | A             |               |                                                        |                    |                   |                                            | 99.7 |      |      |      |       |        |
| 3,071,689     | SNV            | C         | T             | Francci3_2602 | ABC transporter related                                |                    |                   |                                            |      |      |      |      | 100   | 99.3   |
| 3,079,415     | SNV            | G         | A             | Francci3_2608 | hypothetical protein                                   |                    | Arg69Cys          |                                            | 99.9 |      |      |      |       |        |
| 3,084,354     | SNV            | G         | A             | Francci3_2613 | hypothetical protein                                   |                    |                   |                                            |      |      |      | 99.8 |       |        |
| 3,085,288     | SNV            | G         | A             |               |                                                        |                    |                   |                                            |      |      | 89.4 |      |       |        |
| 3,107,651     | SNV            | C         | T             | Francci3_2633 | peptidase M50                                          |                    | Gly208Asp         |                                            |      |      | 99.7 |      |       |        |
| 3,107,811     | SNV            | C         | T             | Francci3_2633 | peptidase M50                                          |                    | Ala155Thr         |                                            |      |      | 99.8 |      |       |        |
| 3,110,428     | SNV            | C         | T             | Francci3_2635 | ABC transporter related                                |                    | Ala270Val         |                                            |      |      | 99.6 |      |       |        |
| 3,112,350     | SNV            | C         | T             | Francci3_2636 | hypothetical protein                                   |                    |                   |                                            |      |      |      | 99.5 |       |        |
| 3,118,047     | SNV            | C         | T             | Francci3_2642 | cysteinyl-tRNA synthetase                              |                    |                   |                                            |      |      | 99.8 |      |       |        |
| 3,120,848     | SNV            | C         | T             | Francci3_2645 | phosphoglycerate mutase                                |                    | Ala112Thr         |                                            |      |      | 99.7 |      |       |        |
| 3,133,202     | SNV            | C         | T             | Francci3_2653 | hypothetical protein                                   |                    | Gly12Glu          |                                            |      |      | 86.2 |      |       |        |
| 3,133,364     | SNV            | G         | A             |               |                                                        |                    |                   |                                            |      |      | 99.8 |      |       |        |
| 3,136,220     | SNV            | G         | A             | Francci3_2656 | 2-methylcitrate dehydratase                            |                    |                   |                                            |      |      | 98.9 |      |       |        |
| 3,136,480     | SNV            | C         | T             | Francci3_2656 | 2-methylcitrate dehydratase                            |                    | Gly316Ser         |                                            | 99.6 |      |      |      |       |        |
| 3,138,785     | SNV            | G         | A             | Francci3_2658 | FAD linked oxidase-like                                |                    | Leu400Phe         |                                            |      | 99.3 |      |      |       |        |
| 3,143,724     | SNV            | C         | T             | Francci3_2663 | urease accessory protein UreG                          |                    |                   |                                            |      |      | 87.4 |      |       |        |
| 3,146,271     | SNV            | G         | A             | Francci3_2666 | MMPL                                                   |                    | Pro774Ser         |                                            |      | 99.4 |      |      |       |        |
| 3,146,377     | SNV            | G         | A             | Francci3_2666 | MMPL                                                   |                    |                   |                                            |      | 99.5 |      |      |       |        |
| 3,147,367     | SNV            | G         | A             | Francci3_2666 | MMPL                                                   |                    |                   |                                            |      | 99.6 |      |      |       |        |
| 3,148,088     | SNV            | G         | A             | Francci3_2666 | MMPL                                                   |                    | Ala168Val         |                                            |      | 99.6 |      |      |       |        |
| 3,153,716     | SNV            | C         | T             |               |                                                        |                    |                   |                                            |      | 99.9 |      |      |       |        |
| 3,154,094     | SNV            | C         | T             | Francci3_2671 | pyridoxamine 5'-phosphate oxidase-related, FMN-binding |                    | Thr94Ile          |                                            |      |      |      | 99.9 |       |        |
| 3,154,356     | SNV            | C         | T             | Francci3_2672 | hypothetical protein                                   |                    | Gly295Asp         |                                            |      | 99.7 |      |      |       |        |
| 3,161,056     | SNV            | C         | T             | Francci3_2675 | hypothetical protein                                   |                    | Val27Ile          |                                            |      | 99.6 |      |      |       |        |
| 3,161,554     | SNV            | C         | T             | Francci3_2676 | helicase-like                                          |                    |                   |                                            |      |      | 99.8 |      |       |        |
| 3,161,597     | SNV            | C         | T             | Francci3_2676 | helicase-like                                          |                    | Arg1221His        |                                            |      | 99.6 |      |      |       |        |
| 3,164,451     | SNV            | C         | T             | Francci3_2676 | helicase-like                                          |                    | Glu270Lys         |                                            |      | 99.9 |      |      |       |        |
| 3,164,779     | SNV            | C         | T             | Francci3_2676 | helicase-like                                          |                    | Met160Ile         |                                            |      | 99.8 |      |      |       |        |

Table S2

| Position (nt) | Mutation type* | WT allele            | Mutant allele | Gene ID       | Annotation                                    | N fixation related | Amino acid change | Reads that called a mutation/all reads (%) |      |      |      |      |       |        |
|---------------|----------------|----------------------|---------------|---------------|-----------------------------------------------|--------------------|-------------------|--------------------------------------------|------|------|------|------|-------|--------|
|               |                |                      |               |               |                                               |                    |                   | N3H4                                       | N4H4 | N6F4 | N7C9 | N9D9 | N10E6 | G21E10 |
| 3,165,207     | SNV            | G                    | A             | Francci3_2676 | helicase-like                                 |                    | Pro18Ser          |                                            |      |      |      |      | 99.2  |        |
| 3,165,233     | SNV            | C                    | T             | Francci3_2676 | helicase-like                                 |                    | Gly9Glu           |                                            |      |      | 99.3 |      |       |        |
| 3,172,028     | SNV            | C                    | T             | Francci3_2686 | Rieske (2Fe-2S) protein                       |                    |                   |                                            |      |      | 99.6 |      |       |        |
| 3,172,864     | SNV            | C                    | T             | Francci3_2687 | Rieske (2Fe-2S) protein                       |                    |                   |                                            |      |      | 99.4 |      |       |        |
| 3,173,445     | SNV            | C                    | T             | Francci3_2687 | Rieske (2Fe-2S) protein                       |                    | Ala215Val         |                                            |      |      | 99.8 |      |       |        |
| 3,178,963     | SNV            | C                    | T             | Francci3_2691 | hypothetical protein                          |                    | Gln294*           |                                            |      |      | 99.8 |      |       |        |
| 3,179,495     | SNV            | C                    | T             |               |                                               |                    |                   |                                            |      |      | 99.8 |      |       |        |
| 3,185,820     | SNV            | C                    | T             | Francci3_2700 | putative signal transduction histidine kinase |                    | Ser96Asn          |                                            |      |      | 99.7 |      |       |        |
| 3,186,186     | SNV            | C                    | T             | Francci3_2701 | hypothetical protein                          |                    | Asp88Asn          |                                            |      |      | 99.7 |      |       |        |
| 3,186,943     | SNV            | T                    | C             | Francci3_2702 | XRE family transcriptional regulator          |                    | Leu117Pro         |                                            |      |      | 89.5 |      |       |        |
| 3,189,527     | SNV            | C                    | T             | Francci3_2705 | arginyl-tRNA synthetase                       |                    | Ala558Thr         |                                            |      |      | 99.3 |      |       |        |
| 3,196,317     | SNV            | C                    | T             | Francci3_2711 | pyridoxal-dependent decarboxylase             |                    | Ala310Thr         |                                            |      | 99.8 |      |      |       |        |
| 3,197,712     | SNV            | C                    | T             | Francci3_2712 | transposase, IS4                              |                    |                   |                                            |      | 83.3 |      |      |       |        |
| 3,210,187     | SNV            | C                    | T             | Francci3_2725 | hypothetical protein                          |                    |                   |                                            |      |      | 99.7 |      |       |        |
| 3,235,920     | SNV            | C                    | T             |               |                                               |                    |                   |                                            |      |      |      |      | 99.6  |        |
| 3,242,134     | SNV            | G                    | A             | Francci3_2751 | putative transcriptional regulator            |                    | Pro84Ser          |                                            |      |      | 99.7 |      |       |        |
| 3,248,325     | SNV            | C                    | T             | Francci3_2756 | tryptophan halogenase                         |                    | Pro492Ser         |                                            |      | 99.6 |      |      |       |        |
| 3,254,741     | SNV            | C                    | T             | Francci3_2761 | luciferase-like                               |                    | Val99Met          |                                            |      |      | 99.6 |      |       |        |
| 3,255,851     | SNV            | C                    | T             | Francci3_2762 | putative methyltransferase                    |                    | Ala64Thr          |                                            |      |      | 99.6 |      |       |        |
| 3,257,037     | SNV            | G                    | A             | Francci3_2763 | methyltransferase type 11                     |                    | Gly189Glu         |                                            |      |      | 99.5 |      |       |        |
| 3,273,394     | SNV            | C                    | T             | Francci3_2778 | hypothetical protein                          |                    |                   |                                            |      |      | 99.3 |      |       |        |
| 3,286,894     | Deletion       | CGAG<br>GATG<br>GTTA | -             |               |                                               |                    |                   |                                            | 89.5 |      | 74.0 |      |       |        |
| 3,293,005     | SNV            | G                    | A             | Francci3_2796 | ATPase, E1-E2 type                            |                    | Ala504Val         |                                            |      |      |      |      | 99.8  |        |
| 3,293,165     | SNV            | G                    | A             | Francci3_2796 | ATPase, E1-E2 type                            |                    | Leu451Phe         |                                            |      |      |      |      | 99.8  |        |
| 3,294,594     | SNV            | G                    | A             |               |                                               |                    |                   |                                            |      |      |      |      | 99.7  |        |
| 3,295,501     | SNV            | G                    | A             | Francci3_2797 | undecaprenyl pyrophosphate                    |                    |                   |                                            |      |      |      |      | 99.9  |        |
| 3,296,914     | SNV            | G                    | A             | Francci3_2799 | transposase, IS4                              |                    | Thr339Ile         |                                            |      |      |      |      | 94.4  |        |
| 3,298,340     | SNV            | G                    | A             | Francci3_2800 | hypothetical protein                          |                    |                   |                                            |      |      |      |      | 99.8  |        |
| 3,299,617     | SNV            | C                    | T             | Francci3_2801 | hypothetical protein                          |                    | Gly60Asp          |                                            |      |      |      |      | 99.8  |        |
| 3,303,740     | SNV            | C                    | T             | Francci3_2804 | citrate lyase                                 |                    |                   |                                            |      |      |      |      | 99.8  |        |
| 3,306,974     | SNV            | G                    | A             | Francci3_2808 | hypothetical protein                          |                    | Ala207Val         |                                            |      |      |      |      | 99.6  |        |
| 3,308,146     | SNV            | C                    | T             | Francci3_2809 | hypothetical protein                          |                    | Arg67His          |                                            |      |      |      |      | 99.9  |        |
| 3,310,180     | SNV            | C                    | T             | Francci3_2811 | serine/threonine protein kinase               |                    | Arg26Trp          |                                            |      |      |      |      |       | 100    |
| 3,311,477     | SNV            | C                    | T             | Francci3_2811 | serine/threonine protein kinase               |                    | Ala458Val         |                                            |      |      | 100  |      |       |        |
| 3,311,532     | SNV            | C                    | T             | Francci3_2811 | serine/threonine protein kinase               |                    |                   |                                            |      |      |      |      | 99.9  |        |
| 3,312,292     | SNV            | C                    | T             | Francci3_2811 | serine/threonine protein kinase               |                    | Leu730Phe         |                                            |      |      |      |      | 99.8  |        |
| 3,313,599     | SNV            | C                    | T             | Francci3_2813 | extracellular solute-binding protein          |                    | Met78Ile          |                                            |      |      |      |      | 99.8  |        |

Table S2

| Position (nt) | Mutation type* | WT allele | Mutant allele | Gene ID       | Annotation                                                           | N fixation related | Amino acid change | Reads that called a mutation/all reads (%) |      |      |      |      |       |        |
|---------------|----------------|-----------|---------------|---------------|----------------------------------------------------------------------|--------------------|-------------------|--------------------------------------------|------|------|------|------|-------|--------|
|               |                |           |               |               |                                                                      |                    |                   | N3H4                                       | N4H4 | N6F4 | N7C9 | N9D9 | N10E6 | G21E10 |
| 3,315,505     | SNV            | G         | A             | Francci3_2814 | hypothetical protein                                                 |                    |                   |                                            |      |      |      | 99.9 |       |        |
| 3,316,503     | SNV            | G         | A             | Francci3_2816 | hypothetical protein                                                 |                    |                   |                                            |      |      |      | 99.8 |       |        |
| 3,316,595     | SNV            | C         | T             | Francci3_2816 | hypothetical protein                                                 |                    | Gly168Arg         |                                            |      |      |      |      | 99.9  |        |
| 3,317,759     | SNV            | C         | T             |               |                                                                      |                    |                   |                                            |      |      |      |      | 99.6  |        |
| 3,318,989     | SNV            | C         | T             | Francci3_2818 | bacterioferritin                                                     |                    | Trp135*           |                                            |      |      |      | 99.9 |       |        |
| 3,320,429     | SNV            | C         | T             | Francci3_2819 | hypothetical protein                                                 |                    | Gly14Asp          |                                            |      |      |      | 99.2 |       |        |
| 3,321,176     | SNV            | C         | T             |               |                                                                      |                    |                   |                                            |      |      |      |      | 99.3  |        |
| 3,323,977     | SNV            | C         | T             | Francci3_2823 | L-proline dehydrogenase                                              |                    | Asp135Asn         |                                            |      |      |      |      | 99.9  |        |
| 3,324,558     | SNV            | C         | T             | Francci3_2824 | hypothetical protein                                                 |                    |                   |                                            |      |      |      |      | 99.5  |        |
| 3,324,806     | SNV            | C         | T             | Francci3_2824 | hypothetical protein                                                 |                    | Ala23Thr          |                                            |      |      |      |      | 99.6  |        |
| 3,324,939     | SNV            | G         | A             |               |                                                                      |                    |                   |                                            |      |      |      | 100  |       |        |
| 3,326,242     | SNV            | G         | A             | Francci3_2826 | ATP-binding region, ATPase-like                                      |                    |                   |                                            |      |      |      |      | 99.9  |        |
| 3,326,346     | SNV            | C         | T             | Francci3_2826 | ATP-binding region, ATPase-like                                      |                    | Ala706Thr         |                                            |      |      |      |      | 99.5  |        |
| 3,328,211     | SNV            | C         | T             | Francci3_2826 | ATP-binding region, ATPase-like                                      |                    | Gly84Asp          |                                            |      |      |      |      | 99.9  |        |
| 3,328,631     | SNV            | C         | T             |               |                                                                      |                    |                   |                                            |      |      |      |      | 99.7  |        |
| 3,331,991     | SNV            | C         | T             | Francci3_2829 | HNH endonuclease                                                     |                    | Ala46Thr          |                                            |      |      |      | 99.7 |       |        |
| 3,332,318     | SNV            | C         | T             |               |                                                                      |                    |                   |                                            |      |      |      | 99.9 |       |        |
| 3,333,914     | SNV            | C         | T             | Francci3_2830 | O-acetylhomoserine aminocarboxypropyltransferase                     |                    |                   |                                            |      |      |      | 99.5 |       |        |
| 3,335,029     | SNV            | G         | A             | Francci3_2831 | homoserine O-acetyltransferase                                       |                    | Ala265Thr         |                                            |      |      |      |      | 99.8  |        |
| 3,335,859     | SNV            | G         | A             | Francci3_2832 | RpiR family transcriptional regulator                                |                    | Ala95Thr          |                                            |      |      |      |      | 99.6  |        |
| 3,336,478     | SNV            | G         | A             | Francci3_2832 | RpiR family transcriptional regulator                                |                    | Gly301Asp         |                                            |      |      |      |      | 98.2  |        |
| 3,338,787     | SNV            | G         | A             | Francci3_2834 | extracellular solute-binding protein                                 |                    | Asp232Asn         |                                            |      |      |      |      | 99.8  |        |
| 3,340,697     | SNV            | G         | A             | Francci3_2836 | metallophosphoesterase                                               |                    | Gly88Asp          |                                            |      |      |      | 99.4 |       |        |
| 3,341,056     | SNV            | G         | A             | Francci3_2836 | metallophosphoesterase                                               |                    | Ala208Thr         |                                            |      |      |      | 99.5 |       |        |
| 3,341,598     | SNV            | C         | T             | Francci3_2837 | binding-protein-dependent transport systems inner membrane component |                    | Pro66Leu          |                                            |      |      |      |      | 99.7  |        |
| 3,342,853     | SNV            | C         | T             | Francci3_2838 | binding-protein-dependent transport systems inner membrane component |                    |                   |                                            |      |      |      |      | 100   |        |
| 3,343,119     | SNV            | G         | A             | Francci3_2838 | binding-protein-dependent transport systems inner membrane component |                    |                   |                                            |      |      |      | 99.9 |       |        |
| 3,343,758     | SNV            | C         | T             | Francci3_2839 | McrBC 5-methylcytosine restriction system component-like             |                    |                   |                                            |      |      |      |      | 99.7  |        |
| 3,344,089     | SNV            | C         | T             | Francci3_2839 | McrBC 5-methylcytosine restriction system component-like             |                    | Gly203Asp         |                                            |      |      |      |      | 99.9  |        |
| 3,345,737     | SNV            | C         | T             | Francci3_2840 | AAA_5 ATPase associated with various cellular activities             |                    | Gly397Glu         |                                            |      |      |      |      | 99.5  |        |
| 3,346,037     | SNV            | G         | A             | Francci3_2840 | AAA_5 ATPase associated with various cellular activities             |                    | Ala297Val         |                                            |      |      |      | 99.6 |       |        |

Table S2

| Position (nt) | Mutation type* | WT allele | Mutant allele | Gene ID       | Annotation                                               | N fixation related | Amino acid change | Reads that called a mutation/all reads (%) |      |      |      |      |       |        |
|---------------|----------------|-----------|---------------|---------------|----------------------------------------------------------|--------------------|-------------------|--------------------------------------------|------|------|------|------|-------|--------|
|               |                |           |               |               |                                                          |                    |                   | N3H4                                       | N4H4 | N6F4 | N7C9 | N9D9 | N10E6 | G21E10 |
| 3,346,126     | SNV            | G         | A             | Francci3_2840 | AAA_5 ATPase associated with various cellular activities |                    |                   |                                            |      |      |      | 99.7 |       |        |
| 3,346,642     | SNV            | G         | A             | Francci3_2840 | AAA_5 ATPase associated with various cellular activities |                    |                   |                                            |      |      |      | 99.7 |       |        |
| 3,346,719     | SNV            | C         | T             | Francci3_2840 | AAA_5 ATPase associated with various cellular activities |                    | Ala70Thr          |                                            |      |      |      |      | 99.5  |        |
| 3,347,869     | SNV            | C         | T             | Francci3_2841 | zeta toxin                                               |                    | Pro171Ser         |                                            |      |      |      | 99.7 |       |        |
| 3,349,258     | SNV            | C         | T             | Francci3_2842 | DEAD/DEAH box helicase-like                              |                    |                   |                                            |      |      |      | 86.9 |       |        |
| 3,349,947     | SNV            | C         | T             |               |                                                          |                    |                   |                                            |      |      |      | 99.6 |       |        |
| 3,353,517     | SNV            | C         | T             | Francci3_2845 | DNA helicase, putative                                   |                    |                   |                                            |      |      |      |      | 99.8  |        |
| 3,357,930     | SNV            | C         | T             | Francci3_2846 | hypothetical protein                                     |                    | Gly235Asp         |                                            |      |      |      |      | 99.7  |        |
| 3,359,267     | SNV            | C         | T             | Francci3_2847 | antibiotic biosynthesis                                  |                    |                   |                                            |      |      |      |      | 99.7  |        |
| 3,360,272     | SNV            | C         | T             | Francci3_2849 | glucose 1-dehydrogenase                                  |                    | Gly132Arg         |                                            |      |      |      |      | 100   |        |
| 3,362,428     | SNV            | G         | A             | Francci3_2851 | beta-ketoacyl synthase                                   |                    | Pro349Ser         |                                            |      |      |      |      | 99.8  |        |
| 3,364,703     | SNV            | G         | A             | Francci3_2854 | phosphopantetheine-binding                               |                    | Gln17*            |                                            |      |      |      |      | 99.9  |        |
| 3,366,314     | SNV            | G         | A             | Francci3_2856 | regulatory protein, LuxR                                 |                    | Ala193Val         |                                            |      |      |      |      | 99.9  |        |
| 3,368,971     | SNV            | G         | A             | Francci3_2860 | periplasmic sensor signal transduction histidine kinase  |                    | Pro855Leu         |                                            |      |      |      |      | 99.8  |        |
| 3,371,640     | SNV            | G         | A             |               |                                                          |                    |                   |                                            |      |      |      |      | 99.9  |        |
| 3,372,258     | SNV            | G         | A             |               |                                                          |                    |                   |                                            |      |      |      |      | 99.5  |        |
| 3,373,619     | SNV            | G         | A             | Francci3_2862 | hypothetical protein                                     |                    | Val56Met          |                                            |      |      |      |      | 99.6  |        |
| 3,375,650     | SNV            | G         | A             | Francci3_2864 | hypothetical protein                                     |                    | Ala132Thr         |                                            |      |      |      |      | 99.7  |        |
| 3,378,917     | SNV            | G         | A             |               |                                                          |                    |                   |                                            |      |      |      |      | 99.7  |        |
| 3,393,009     | SNV            | C         | T             | Francci3_2875 | serine/threonine protein kinase                          |                    | Thr485Ile         |                                            |      |      |      |      | 99.7  |        |
| 3,407,566     | SNV            | C         | T             | Francci3_2893 | hypothetical protein                                     |                    |                   | 99.5                                       |      | 79.7 |      |      |       |        |
| 3,413,886     | SNV            | C         | T             |               |                                                          |                    |                   |                                            |      | 99.8 |      |      |       |        |
| 3,417,611     | SNV            | G         | A             | Francci3_2902 | hypothetical protein                                     |                    | Gln239*           |                                            | 100  |      |      |      |       |        |
| 3,418,389     | SNV            | C         | T             |               |                                                          |                    |                   |                                            |      |      |      |      | 99.5  |        |
| 3,427,787     | SNV            | C         | T             | Francci3_2910 | asparagine synthase, glutamine-hydrolyzing               |                    | Gly92Ser          |                                            | 99.6 |      |      |      |       |        |
| 3,429,300     | SNV            | G         | A             | Francci3_2911 | hypothetical protein                                     |                    |                   |                                            |      |      |      | 88.7 |       |        |
| 3,429,358     | SNV            | G         | A             | Francci3_2911 | hypothetical protein                                     |                    | Ala521Val         |                                            |      |      |      | 90.3 |       |        |
| 3,434,839     | SNV            | G         | A             | Francci3_2915 | hypothetical protein                                     |                    | Ala370Val         | 99.3                                       |      | 79.4 |      |      |       |        |
| 3,443,564     | SNV            | C         | T             |               |                                                          |                    |                   | 99.8                                       |      | 80.3 |      |      |       |        |
| 3,453,287     | SNV            | C         | T             | Francci3_2930 | Beta-hydroxyacyl dehydratase                             |                    | Gly553Glu         |                                            |      |      |      |      | 99.5  |        |
| 3,453,299     | SNV            | C         | T             | Francci3_2930 | Beta-hydroxyacyl dehydratase                             |                    | Arg549Gln         |                                            |      |      |      |      | 99.8  |        |
| 3,459,061     | SNV            | C         | T             | Francci3_2931 | beta-ketoacyl synthase                                   |                    | Val1203Met        |                                            |      |      |      |      | 99.7  |        |
| 3,459,518     | SNV            | C         | T             | Francci3_2931 | beta-ketoacyl synthase                                   |                    |                   |                                            |      |      |      |      | 100   |        |
| 3,478,720     | SNV            | C         | T             | Francci3_2944 | aldehyde dehydrogenase                                   |                    | Gln348*           |                                            |      |      |      |      | 99.8  |        |
| 3,478,739     | SNV            | C         | T             | Francci3_2944 | aldehyde dehydrogenase                                   |                    | Ser354Phe         |                                            | 99.4 |      |      |      |       |        |

Table S2

| Position (nt) | Mutation type* | WT allele    | Mutant allele | Gene ID       | Annotation                                          | N fixation related | Amino acid change | Reads that called a mutation/all reads (%) |      |      |      |      |       |        |
|---------------|----------------|--------------|---------------|---------------|-----------------------------------------------------|--------------------|-------------------|--------------------------------------------|------|------|------|------|-------|--------|
|               |                |              |               |               |                                                     |                    |                   | N3H4                                       | N4H4 | N6F4 | N7C9 | N9D9 | N10E6 | G21E10 |
| 3,479,504     | SNV            | G            | A             | Francci3_2945 | zinc-binding alcohol dehydrogenase                  |                    | Val74Met          |                                            | 99.8 |      |      |      |       |        |
| 3,484,871     | SNV            | C            | T             | Francci3_2949 | catalase                                            |                    | Gly419Asp         |                                            |      | 99.8 |      |      |       |        |
| 3,488,104     | SNV            | C            | T             | Francci3_2950 | CoA-binding                                         |                    |                   |                                            |      |      |      | 99.8 |       |        |
| 3,499,816     | SNV            | G            | A             | Francci3_2954 | bacteriophage resistance gene PglY                  |                    | Glu726Lys         |                                            |      |      |      | 99.8 |       |        |
| 3,507,925     | SNV            | G            | A             | Francci3_2958 | transcriptional modulator of MazE/toxin, MazF       |                    |                   |                                            |      |      |      | 99.9 |       |        |
| 3,517,804     | SNV            | G            | A             | Francci3_2974 | allophanate hydrolase subunit 1                     |                    | Gly82Ser          |                                            |      | 99.5 |      |      |       |        |
| 3,532,065     | SNV            | C            | T             | Francci3_2982 | acyl-CoA synthetase                                 |                    | Leu173Phe         |                                            |      |      |      | 99.8 |       |        |
| 3,540,845     | Deletion       | CGGC<br>AACC | -             |               |                                                     |                    |                   |                                            |      | 73.9 | 75.3 |      |       |        |
| 3,563,162     | SNV            | G            | A             |               |                                                     |                    |                   |                                            |      |      |      |      |       | 100    |
| 3,576,431     | SNV            | G            | A             | Francci3_3013 | glutamate synthase (NADH) large                     |                    |                   |                                            |      |      |      | 99.4 |       |        |
| 3,589,696     | SNV            | C            | T             | Francci3_3023 | phosphoribosyl isomerase A                          |                    | Ala37Thr          | 99.7                                       |      | 80.1 |      |      |       |        |
| 3,589,960     | SNV            | C            | T             | Francci3_3024 | imidazole glycerol phosphate synthase subunit HisH  |                    | Asp196Asn         |                                            | 99.9 |      |      |      |       |        |
| 3,590,050     | SNV            | C            | T             | Francci3_3024 | imidazole glycerol phosphate synthase subunit HisH  |                    | Asp166Asn         |                                            | 99.8 |      |      |      |       |        |
| 3,634,715     | SNV            | C            | T             | Francci3_3065 | stress protein                                      |                    | Val32Met          |                                            |      |      |      | 85.5 |       |        |
| 3,638,260     | SNV            | C            | T             | Francci3_3070 | thiamine-phosphate                                  |                    |                   |                                            |      |      |      | 99.8 |       |        |
| 3,638,769     | SNV            | C            | T             | Francci3_3070 | thiamine-phosphate                                  |                    | Gly65Arg          |                                            |      |      |      | 99.6 |       |        |
| 3,639,747     | SNV            | G            | A             | Francci3_3073 | oxidoreductase-like                                 |                    | Ala540Val         |                                            |      |      |      | 99.8 |       |        |
| 3,651,220     | SNV            | G            | A             | Francci3_3081 | XRE family transcriptional regulator                |                    |                   |                                            | 99.9 |      |      |      |       |        |
| 3,651,410     | SNV            | C            | T             | Francci3_3082 | hypothetical protein                                |                    | Glu245Lys         |                                            |      |      |      | 99.7 |       |        |
| 3,651,646     | SNV            | G            | A             | Francci3_3082 | hypothetical protein                                |                    | Ala166Val         |                                            |      | 99.5 |      |      |       |        |
| 3,666,124     | SNV            | C            | T             | Francci3_3094 | arsenite-transporting ATPase                        |                    | Gly169Asp         |                                            |      |      |      | 99.6 |       |        |
| 3,673,048     | SNV            | G            | A             |               |                                                     |                    |                   |                                            |      |      |      | 99.8 |       |        |
| 3,678,218     | SNV            | G            | A             | Francci3_3105 | cytochrome b/b6-like                                |                    |                   |                                            |      |      |      | 99.8 |       |        |
| 3,678,330     | SNV            | G            | A             | Francci3_3105 | cytochrome b/b6-like                                |                    | Thr332Ile         |                                            |      |      |      | 99.8 |       |        |
| 3,681,125     | SNV            | C            | T             | Francci3_3107 | cytochrome c, class I                               |                    | Ala145Thr         |                                            |      | 99.9 |      |      |       |        |
| 3,682,437     | SNV            | C            | T             |               |                                                     |                    |                   |                                            |      | 99.4 |      |      |       |        |
| 3,716,754     | SNV            | C            | T             |               |                                                     |                    |                   |                                            |      |      |      | 99.7 |       |        |
| 3,724,379     | SNV            | G            | A             | Francci3_3146 | NH(3)-dependent NAD(+) synthetase                   |                    | Asp478Asn         |                                            |      | 74.6 |      |      |       |        |
| 3,724,698     | SNV            | C            | T             | Francci3_3146 | NH(3)-dependent NAD(+) synthetase                   |                    | Thr584Ile         | 99.4                                       |      | 77.5 |      |      |       |        |
| 3,734,368     | SNV            | G            | A             | Francci3_3156 | NUDIX hydrolase                                     |                    |                   |                                            |      |      |      | 99.6 |       |        |
| 3,737,009     | SNV            | G            | A             | Francci3_3158 | DNA repair protein RecN                             |                    | Ala582Val         |                                            |      |      |      | 99.0 |       |        |
| 3,739,077     | SNV            | G            | A             | Francci3_3159 | inorganic polyphosphate/ATP-NAD                     |                    | Pro285Ser         |                                            |      |      |      | 99.9 |       |        |
| 3,741,550     | SNV            | G            | A             | Francci3_3162 | hypothetical protein                                |                    | Arg29His          |                                            |      |      |      | 99.4 |       |        |
| 3,745,620     | SNV            | G            | A             |               |                                                     |                    |                   |                                            |      | 99.7 |      |      |       |        |
| 3,768,414     | SNV            | C            | T             | Francci3_3178 | PAS/PAC sensor signal transduction histidine kinase |                    | Cys96Tyr          |                                            |      |      |      |      |       | 100    |

Table S2

| Position (nt) | Mutation type* | WT allele | Mutant allele | Gene ID       | Annotation                                              | N fixation related | Amino acid change | Reads that called a mutation/all reads (%) |      |      |      |      |       |        |       |
|---------------|----------------|-----------|---------------|---------------|---------------------------------------------------------|--------------------|-------------------|--------------------------------------------|------|------|------|------|-------|--------|-------|
|               |                |           |               |               |                                                         |                    |                   | N3H4                                       | N4H4 | N6F4 | N7C9 | N9D9 | N10E6 | G21E10 | G23C4 |
| 3,770,913     | SNV            | G         | A             | Francci3_3182 | translation initiation factor IF-3                      |                    |                   |                                            | 76.2 |      |      |      |       |        |       |
| 3,787,684     | SNV            | G         | A             | Francci3_3196 | putative integration host factor MihF                   |                    |                   |                                            |      |      |      | 99.8 |       |        |       |
| 3,789,942     | SNV            | G         | A             | Francci3_3198 | carbamoyl phosphate synthase large subunit              |                    | Ala736Val         |                                            |      |      |      | 99.8 |       |        |       |
| 3,792,393     | SNV            | C         | T             | Francci3_3199 | carbamoyl phosphate synthase small subunit              |                    |                   |                                            |      |      |      | 100  |       |        |       |
| 3,811,975     | SNV            | C         | T             |               |                                                         |                    |                   | 99.8                                       |      | 81.5 |      |      |       |        |       |
| 3,813,189     | SNV            | G         | C             | Francci3_3218 | GntR family transcriptional regulator                   |                    | Asp240His         |                                            |      | 52.6 |      |      |       |        |       |
| 3,814,964     | SNV            | G         | A             | Francci3_3219 | glutamyl-tRNA synthetase                                |                    |                   |                                            |      |      |      |      |       |        | 100   |
| 3,819,167     | SNV            | C         | T             | Francci3_3226 | hypothetical protein                                    |                    | Ala270Thr         |                                            | 77.8 |      |      |      |       |        |       |
| 3,828,109     | SNV            | C         | T             | Francci3_3233 | methyltransferase type 11                               |                    | Arg214Trp         |                                            |      |      |      | 99.5 |       |        |       |
| 3,828,526     | SNV            | G         | A             | Francci3_3234 | MMP_L                                                   |                    | Gly45Glu          |                                            | 99.8 |      |      |      |       |        |       |
| 3,847,879     | SNV            | G         | A             | Francci3_3249 | serine phosphatase                                      |                    | Arg29Cys          |                                            |      |      | 99.9 |      |       |        |       |
| 3,852,650     | SNV            | C         | T             | Francci3_3253 | two component LuxR family transcriptional regulator     |                    | Gln21*            |                                            |      |      |      | 88.5 |       |        |       |
| 3,855,625     | SNV            | C         | T             | Francci3_3256 | WD-40 repeat-containing serine/threonine protein kinase |                    | Gly758Asp         | 99.8                                       |      | 84.8 |      |      |       |        |       |
| 3,860,379     | SNV            | C         | T             | Francci3_3258 | acyltransferase 3                                       |                    |                   |                                            |      |      |      | 99.7 |       |        |       |
| 3,861,842     | SNV            | C         | T             | Francci3_3258 | acyltransferase 3                                       |                    | Ala504Val         |                                            |      |      |      | 99.4 |       |        |       |
| 3,863,591     | SNV            | G         | A             | Francci3_3259 | glycoside hydrolase family protein                      |                    | Glu313Lys         | 99.9                                       |      | 82.6 |      |      |       |        |       |
| 3,865,429     | SNV            | G         | A             |               |                                                         |                    |                   |                                            |      |      | 99.9 |      |       |        |       |
| 3,867,264     | SNV            | G         | A             |               |                                                         |                    |                   |                                            | 99.8 |      |      |      |       |        |       |
| 3,876,184     | SNV            | G         | A             | Francci3_3273 | methionyl-tRNA synthetase                               |                    | Ala30Val          |                                            |      |      | 99.6 |      |       |        |       |
| 3,905,461     | SNV            | C         | T             |               |                                                         |                    |                   | 99.4                                       |      | 76.8 |      |      |       |        |       |
| 3,907,940     | SNV            | C         | T             | Francci3_3300 | hypothetical protein                                    |                    |                   |                                            |      |      | 99.9 |      |       |        |       |
| 3,908,721     | SNV            | C         | T             |               |                                                         |                    |                   | 98.6                                       |      | 80.6 |      |      |       |        |       |
| 3,913,948     | SNV            | G         | A             | Francci3_3304 | hypothetical protein                                    |                    | Pro103Leu         |                                            | 100  |      |      |      |       |        |       |
| 3,915,655     | SNV            | C         | T             | Francci3_3305 | Type IV secretory pathway VirD4 components-like         |                    | Ala238Thr         | 99.8                                       |      | 81.4 |      |      |       |        |       |
| 3,916,878     | SNV            | C         | T             | Francci3_3306 | hypothetical protein                                    |                    | Ala126Thr         | 100                                        |      | 84.6 |      |      |       |        |       |
| 3,917,772     | SNV            | C         | T             | Francci3_3307 | zinc finger, CHC2-type                                  |                    | Ala33Val          | 99.4                                       |      | 80.1 |      |      |       |        |       |
| 3,921,569     | SNV            | C         | T             |               |                                                         |                    |                   | 99.9                                       |      | 81.7 |      |      |       |        |       |
| 3,924,365     | SNV            | C         | T             |               |                                                         |                    |                   | 99.5                                       |      | 80.0 |      |      |       |        |       |
| 3,925,842     | SNV            | C         | T             |               |                                                         |                    |                   | 98.3                                       |      | 81.9 |      |      |       |        |       |
| 3,931,147     | SNV            | C         | T             | Francci3_3316 | protein-L-isoaspartate(D-aspartate) O-methyltransferase |                    |                   | 99.9                                       |      | 79.7 |      |      |       |        |       |
| 3,931,346     | SNV            | G         | A             | Francci3_3316 | protein-L-isoaspartate(D-aspartate) O-methyltransferase |                    | Ala158Val         |                                            |      |      | 99.8 |      |       |        |       |
| 3,931,993     | SNV            | C         | T             | Francci3_3317 | hypothetical protein                                    |                    |                   | 99.7                                       |      | 83.6 |      |      |       |        |       |
| 3,935,706     | SNV            | G         | A             |               |                                                         |                    |                   |                                            |      |      | 99.6 |      |       |        |       |



Table S2

| Position (nt) | Mutation type* | WT allele                    | Mutant allele | Gene ID       | Annotation                                              | N fixation related | Amino acid change | Reads that called a mutation/all reads (%) |      |      |      |       |       |        |
|---------------|----------------|------------------------------|---------------|---------------|---------------------------------------------------------|--------------------|-------------------|--------------------------------------------|------|------|------|-------|-------|--------|
|               |                |                              |               |               |                                                         |                    |                   | N3H4                                       | N4H4 | N6F4 | N7C9 | N9D9  | N10E6 | G21E10 |
| 3,939,194     | SNV            | C                            | T             | Francci3_3323 | hypothetical protein                                    |                    | Gly45Asp          |                                            |      |      | 99.3 |       |       |        |
| 3,952,049     | SNV            | G                            | A             | Francci3_3334 | hypothetical protein                                    |                    |                   |                                            |      |      |      | 99.8  |       |        |
| 3,969,971     | SNV            | G                            | A             | Francci3_3346 | CRISPR-associated Cas1 family                           |                    | Val69Ile          |                                            |      |      | 99.6 |       |       |        |
| 3,977,872     | SNV            | G                            | A             |               |                                                         |                    |                   |                                            |      |      | 99.8 |       |       |        |
| 3,978,174     | SNV            | G                            | A             |               |                                                         |                    |                   |                                            |      |      | 99.9 |       |       |        |
| 3,979,030     | SNV            | G                            | A             | Francci3_3355 | benzoate membrane transport protein                     |                    |                   |                                            |      |      | 99.3 |       |       |        |
| 3,996,291     | SNV            | G                            | A             | Francci3_3367 | hypothetical protein                                    |                    | Pro154Leu         | 99.6                                       |      | 75.1 |      |       |       |        |
| 3,996,872     | SNV            | C                            | T             | Francci3_3368 | aminoglycoside phosphotransferase                       |                    | Gly229Asp         |                                            |      |      | 99.9 |       |       |        |
| 3,997,837     | SNV            | C                            | T             | Francci3_3369 | aminotransferase                                        |                    | Gly350Ser         |                                            |      |      |      | 99.7  |       |        |
| 4,008,937     | SNV            | C                            | T             | Francci3_3378 | tRNA-guanine transglycosylases, various specificities   |                    | Pro118Ser         |                                            |      |      | 99.4 |       |       |        |
| 4,018,637     | SNV            | C                            | T             | Francci3_3390 | phage integrase                                         |                    |                   | 99.7                                       |      | 81.8 |      |       |       |        |
| 4,020,009     | SNV            | A                            | G             | Francci3_3391 | hypothetical protein                                    |                    |                   | 99.6                                       |      | 84.9 |      |       |       |        |
| 4,026,294     | SNV            | G                            | A             | Francci3_3395 | WD-40 repeat-containing serine/threonine protein kinase |                    |                   |                                            |      |      |      | 99.6  |       |        |
| 4,034,756     | Deletion       | CTCC<br>GGAC<br>CACC<br>GGAC | -             |               |                                                         |                    |                   |                                            |      |      | 60.9 | 64.8  |       |        |
| 4,035,282     | SNV            | C                            | T             | Francci3_3403 | iron permease FTR1                                      |                    | Ala48Val          |                                            |      |      |      | 99.7  |       |        |
| 4,039,342     | SNV            | C                            | T             | Francci3_3405 | twin-arginine translocation pathway                     |                    |                   |                                            |      |      |      | 99.9  |       |        |
| 4,040,944     | SNV            | C                            | T             | Francci3_3406 | AAA ATPase, central region                              |                    | His105Tyr         |                                            |      |      |      | 100.0 |       |        |
| 4,041,649     | SNV            | C                            | T             | Francci3_3406 | AAA ATPase, central region                              |                    | Leu340Phe         |                                            |      |      | 99.8 |       |       |        |
| 4,042,831     | SNV            | G                            | A             | Francci3_3407 | hypothetical protein                                    |                    | Ala199Val         |                                            |      |      |      | 99.7  |       |        |
| 4,050,559     | SNV            | C                            | T             | Francci3_3410 | serine/threonine protein kinase                         |                    |                   |                                            |      |      |      | 99.8  |       |        |
| 4,050,596     | SNV            | G                            | A             | Francci3_3410 | serine/threonine protein kinase                         |                    | Thr359Ile         |                                            |      |      | 99.8 |       |       |        |
| 4,062,530     | SNV            | G                            | A             | Francci3_3418 | sporulation and cell division protein                   |                    | Thr56Ile          |                                            |      |      | 99.9 |       |       |        |
| 4,077,762     | SNV            | G                            | A             |               |                                                         |                    |                   |                                            |      |      |      | 99.9  |       |        |
| 4,078,191     | SNV            | G                            | A             | Francci3_3428 | limonene-1,2-epoxide hydrolase                          |                    |                   |                                            |      |      | 99.9 |       |       |        |
| 4,105,091     | SNV            | C                            | T             | Francci3_3448 | ATP-dependent helicase HrpA                             |                    |                   | 99.9                                       |      | 78.2 |      |       |       |        |
| 4,112,048     | SNV            | G                            | A             |               |                                                         |                    |                   |                                            |      |      | 99.9 |       |       |        |
| 4,112,150     | SNV            | G                            | A             | Francci3_3452 | galactose-1-phosphate                                   |                    |                   |                                            |      |      | 99.8 |       |       |        |
| 4,115,757     | SNV            | G                            | A             | Francci3_3455 | putative lipoprotein                                    |                    |                   |                                            |      | 99.9 |      |       |       |        |
| 4,115,971     | SNV            | G                            | A             | Francci3_3455 | putative lipoprotein                                    |                    | Val279Ile         |                                            |      |      |      | 99.8  |       |        |
| 4,116,060     | SNV            | C                            | T             | Francci3_3455 | putative lipoprotein                                    |                    |                   | 99.7                                       |      | 81.6 |      |       |       |        |
| 4,117,252     | SNV            | G                            | A             | Francci3_3456 | ABC transporter related                                 |                    |                   | 99.9                                       |      | 75.3 |      |       |       |        |
| 4,122,751     | SNV            | G                            | A             | Francci3_3458 | hypothetical protein                                    |                    | Asp207Asn         |                                            |      |      | 99.7 |       |       |        |
| 4,124,763     | SNV            | G                            | A             | Francci3_3459 | LmbE-like protein                                       |                    | Ser195Phe         |                                            |      |      | 99.5 |       |       |        |
| 4,131,455     | SNV            | C                            | T             | Francci3_3466 | succinate dehydrogenase flavoprotein subunit            |                    | Thr152Ile         |                                            |      |      | 99.7 |       |       |        |

Table S2

| Position (nt) | Mutation type* | WT allele | Mutant allele | Gene ID       | Annotation                               | N fixation related | Amino acid change | Reads that called a mutation/all reads (%) |      |      |      |      |       |        |
|---------------|----------------|-----------|---------------|---------------|------------------------------------------|--------------------|-------------------|--------------------------------------------|------|------|------|------|-------|--------|
|               |                |           |               |               |                                          |                    |                   | N3H4                                       | N4H4 | N6F4 | N7C9 | N9D9 | N10E6 | G21E10 |
| 4,134,555     | SNV            | G         | A             | Francci3_3468 | hypothetical protein                     |                    | Val82Ile          |                                            |      |      |      |      | 99.5  |        |
| 4,141,278     | SNV            | T         | C             | Francci3_3473 | polysaccharide biosynthesis protein      |                    |                   |                                            |      | 99.7 |      |      |       |        |
| 4,142,231     | SNV            | C         | T             | Francci3_3473 | polysaccharide biosynthesis protein      |                    | Ala330Val         |                                            |      |      |      |      | 99.8  |        |
| 4,146,774     | SNV            | G         | A             | Francci3_3477 | protein tyrosine/serine phosphatase      |                    | Arg126His         |                                            |      | 99.7 |      |      |       |        |
| 4,151,690     | SNV            | C         | T             | Francci3_3482 | 3-oxoacyl-(acyl carrier protein)         |                    | Ala181Val         |                                            |      |      |      | 99.8 |       |        |
| 4,163,311     | SNV            | G         | A             |               |                                          |                    |                   | 99.6                                       |      | 77.9 |      |      |       |        |
| 4,163,452     | SNV            | G         | A             | Francci3_3492 | polyphosphate glucokinase                |                    | Asp22Asn          | 99.8                                       |      | 76.3 |      |      |       |        |
| 4,164,803     | SNV            | C         | T             | Francci3_3493 | hypothetical protein                     |                    | Ala105Val         |                                            |      |      |      | 99.9 |       |        |
| 4,174,807     | SNV            | C         | T             |               |                                          |                    |                   |                                            |      |      |      | 99.9 |       |        |
| 4,179,430     | SNV            | C         | T             | Francci3_3502 | GCN5-related N-acetyltransferase         |                    |                   |                                            |      | 99.7 |      |      |       |        |
| 4,193,449     | SNV            | G         | A             |               |                                          |                    |                   |                                            |      |      |      | 99.9 |       |        |
| 4,204,252     | SNV            | G         | A             | Francci3_3519 | ABC transporter related                  |                    | Ala154Thr         |                                            |      | 99.7 |      |      |       |        |
| 4,210,502     | SNV            | G         | A             | Francci3_3525 | recombinase A                            |                    | Ala258Val         |                                            |      |      |      |      | 99.7  |        |
| 4,211,711     | SNV            | C         | T             |               |                                          |                    |                   |                                            |      | 99.7 |      |      |       |        |
| 4,212,938     | SNV            | C         | T             | Francci3_3527 | DEAD/DEAH box helicase-like              |                    |                   |                                            |      | 99.8 |      |      |       |        |
| 4,225,523     | SNV            | C         | T             | Francci3_3536 | Ferritin and Dps                         |                    | Gly80Asp          |                                            |      | 99.7 |      |      |       |        |
| 4,227,241     | SNV            | C         | T             | Francci3_3538 | competence/damage-inducible protein cinA |                    | Ala177Thr         |                                            |      |      |      | 99.8 |       |        |
| 4,238,625     | SNV            | G         | A             | Francci3_3546 | putative phosphoketolase                 |                    | His788Tyr         |                                            |      |      |      | 99.9 |       |        |
| 4,239,283     | SNV            | G         | A             | Francci3_3546 | putative phosphoketolase                 |                    |                   |                                            |      |      |      | 99.9 |       |        |
| 4,239,785     | SNV            | C         | T             | Francci3_3546 | putative phosphoketolase                 |                    | Gly401Glu         |                                            |      |      |      | 99.5 |       |        |
| 4,241,259     | SNV            | C         | T             | Francci3_3547 | FAD-dependent thymidylate synthase       |                    |                   |                                            |      |      |      | 99.7 |       |        |
| 4,242,637     | SNV            | C         | T             | Francci3_3548 | histidyl-tRNA synthetase                 |                    |                   |                                            |      |      |      | 99.5 |       |        |
| 4,247,822     | SNV            | C         | T             | Francci3_3551 | NAD-dependent                            |                    | Trp133*           |                                            |      |      |      | 99.8 |       |        |
| 4,275,934     | SNV            | C         | T             | Francci3_3576 | Poly(3-hydroxybutyrate)                  |                    | Ala65Thr          |                                            |      |      |      | 99.8 |       |        |
| 4,280,143     | SNV            | G         | A             |               |                                          |                    |                   |                                            |      | 99.7 |      |      |       |        |
| 4,280,300     | SNV            | C         | T             | Francci3_3581 | 30S ribosomal protein S2                 |                    | Ala271Thr         |                                            |      |      |      | 99.8 |       |        |
| 4,280,511     | SNV            | G         | A             | Francci3_3581 | 30S ribosomal protein S2                 |                    |                   |                                            |      | 99.8 |      |      |       |        |
| 4,283,443     | SNV            | G         | A             | Francci3_3583 | phage integrase                          |                    |                   |                                            |      | 99.6 |      |      |       |        |
| 4,289,431     | SNV            | G         | A             | Francci3_3589 | signal peptidase I                       |                    | Ser51Phe          |                                            |      |      |      | 99.7 |       |        |
| 4,291,483     | SNV            | G         | A             | Francci3_3592 | 16S rRNA-processing protein RimM         |                    |                   |                                            |      |      |      |      | 99.6  |        |
| 4,300,269     | SNV            | C         | T             |               |                                          |                    |                   |                                            |      |      |      |      | 99.7  |        |
| 4,309,087     | SNV            | G         | A             | Francci3_3607 | DEAD/DEAH box helicase-like              |                    |                   |                                            |      |      |      |      | 99.6  |        |
| 4,311,699     | SNV            | G         | A             | Francci3_3610 | hypothetical protein                     |                    |                   |                                            |      |      |      |      | 99.8  |        |
| 4,316,493     | SNV            | C         | T             | Francci3_3616 | hypothetical protein                     |                    |                   |                                            |      |      |      |      |       | 99.2   |
| 4,316,565     | SNV            | C         | T             | Francci3_3616 | hypothetical protein                     |                    |                   |                                            |      |      |      |      |       |        |
| 4,318,604     | SNV            | G         | A             | Francci3_3617 | diguanylate                              |                    | Pro321Ser         | 99.5                                       |      | 83.9 |      |      |       | 99.9   |
| 4,318,719     | SNV            | C         | T             | Francci3_3617 | diguanylate                              |                    |                   |                                            |      |      |      |      |       |        |
| 4,320,396     | SNV            | C         | T             | Francci3_3618 | polyphosphate kinase                     |                    | Pro190Leu         |                                            |      | 99.7 |      |      |       |        |
| 4,321,740     | SNV            | G         | A             | Francci3_3618 | polyphosphate kinase                     |                    | Gly638Asp         |                                            |      |      |      |      |       | 99.7   |

Table S2

| Position (nt) | Mutation type* | WT allele | Mutant allele | Gene ID       | Annotation                                           | N fixation related | Amino acid change | Reads that called a mutation/all reads (%) |      |      |      |      |       |        |       |
|---------------|----------------|-----------|---------------|---------------|------------------------------------------------------|--------------------|-------------------|--------------------------------------------|------|------|------|------|-------|--------|-------|
|               |                |           |               |               |                                                      |                    |                   | N3H4                                       | N4H4 | N6F4 | N7C9 | N9D9 | N10E6 | G21E10 | G23C4 |
| 4,324,078     | SNV            | G         | A             | Francci3_3621 | isopropylmalate isomerase large                      |                    | Pro299Ser         | 99.7                                       |      | 80.6 |      |      |       |        |       |
| 4,334,155     | SNV            | C         | T             | Francci3_3628 | putative alpha-isopropylmalate/homocitrate synthase  |                    | Asp22Asn          |                                            | 99.9 |      |      |      |       |        |       |
| 4,334,210     | SNV            | C         | T             | Francci3_3628 | putative alpha-isopropylmalate/homocitrate synthase  |                    |                   | 99.5                                       |      | 80.8 |      |      |       |        |       |
| 4,336,481     | SNV            | A         | G             | Francci3_3631 | branched chain amino acid aminotransferase apoenzyme |                    | Phe74Ser          |                                            |      |      |      |      |       | 100    |       |
| 4,338,422     | SNV            | C         | T             |               |                                                      |                    |                   |                                            |      |      |      |      | 99.7  |        |       |
| 4,348,522     | SNV            | C         | T             | Francci3_3640 | acetolactate synthase 1 catalytic                    |                    |                   |                                            |      |      |      | 99.7 |       |        |       |
| 4,355,050     | SNV            | G         | A             | Francci3_3646 | amino acid-binding ACT                               |                    | Met5Ile           |                                            | 99.8 |      | 99.5 | 99.9 | 99.8  | 100    | 100   |
| 4,355,057     | SNV            | C         | T             | Francci3_3646 | amino acid-binding ACT                               |                    |                   |                                            |      |      |      |      | 99.9  |        |       |
| 4,355,723     | SNV            | C         | T             | Francci3_3646 | amino acid-binding ACT                               |                    |                   |                                            |      |      |      |      | 99.8  |        |       |
| 4,355,917     | SNV            | C         | T             | Francci3_3647 | DNA ligase, NAD-dependent                            |                    |                   |                                            |      |      |      |      | 99.7  |        |       |
| 4,356,316     | SNV            | C         | T             | Francci3_3647 | DNA ligase, NAD-dependent                            |                    |                   |                                            |      |      |      |      | 99.6  |        |       |
| 4,358,537     | SNV            | C         | T             | Francci3_3648 | methionine synthase, vitamin-B12 independent         |                    | Val160Ile         |                                            |      |      |      |      | 99.8  |        |       |
| 4,361,052     | SNV            | C         | T             | Francci3_3650 | aminotransferase, class V                            |                    | Val148Met         |                                            |      |      |      |      | 99.7  |        |       |
| 4,362,552     | SNV            | G         | A             | Francci3_3652 | methylmalonyl-CoA mutase                             |                    |                   |                                            |      |      |      |      | 99.7  |        |       |
| 4,373,891     | SNV            | C         | T             | Francci3_3654 | hypothetical protein                                 |                    | Pro67Ser          |                                            |      |      |      |      | 99.9  |        |       |
| 4,379,737     | SNV            | C         | T             | Francci3_3659 | electron transfer flavoprotein beta-                 |                    | Val26Ile          |                                            |      |      |      | 99.9 |       |        |       |
| 4,382,126     | SNV            | G         | A             | Francci3_3661 | endonuclease/exonuclease/phosphata                   |                    |                   |                                            |      |      | 100  |      |       |        |       |
| 4,383,758     | SNV            | G         | A             | Francci3_3662 | short chain enoyl-CoA hydratase                      |                    | Ala24Val          |                                            |      |      |      | 99.4 |       |        |       |
| 4,398,993     | SNV            | G         | A             | Francci3_3671 | hypothetical protein                                 |                    | Pro272Leu         | 99.9                                       |      | 81.7 |      |      |       |        |       |
| 4,399,066     | SNV            | C         | T             | Francci3_3671 | hypothetical protein                                 |                    | Ala248Thr         |                                            |      |      |      |      | 99.9  |        |       |
| 4,399,717     | SNV            | C         | T             | Francci3_3671 | hypothetical protein                                 |                    | Gly31Ser          |                                            |      |      | 99.9 |      |       |        |       |
| 4,404,561     | SNV            | C         | T             | Francci3_3673 | heat shock protein 70                                |                    | Ala436Thr         |                                            |      |      |      |      | 99.9  |        |       |
| 4,409,865     | SNV            | C         | T             | Francci3_3677 | stress protein                                       |                    | Val160Ile         |                                            |      |      | 99.0 |      |       |        |       |
| 4,411,335     | SNV            | G         | A             | Francci3_3678 | alpha amylase, catalytic region                      |                    |                   |                                            |      |      | 99.6 |      |       |        |       |
| 4,425,098     | SNV            | C         | T             | Francci3_3688 | hypothetical protein                                 |                    | Ala114Thr         |                                            |      |      | 99.5 |      |       |        |       |
| 4,425,145     | SNV            | C         | T             | Francci3_3688 | hypothetical protein                                 |                    | Gly98Asp          |                                            |      |      | 99.7 |      |       |        |       |
| 4,427,600     | SNV            | T         | C             | Francci3_3691 | hypothetical protein                                 |                    |                   | 99.7                                       |      | 82.3 |      |      |       |        |       |
| 4,435,001     | SNV            | C         | T             | Francci3_3700 | UDP-N-acetylglucosamine 1-carboxyvinyltransferase    |                    | Gly359Asp         |                                            | 99.9 |      |      |      |       |        |       |
| 4,439,700     | SNV            | G         | A             | Francci3_3706 | FOF1 ATP synthase subunit epsilon                    |                    |                   |                                            | 99.8 |      |      |      |       |        |       |
| 4,453,074     | SNV            | G         | A             | Francci3_3720 | peptide chain release factor 1                       |                    | Leu206Phe         | 99.7                                       |      | 79.8 |      |      |       |        |       |
| 4,473,194     | SNV            | G         | A             | Francci3_3737 | hypothetical protein                                 |                    | Ser135Phe         |                                            |      |      |      |      | 99.9  |        |       |
| 4,476,180     | SNV            | C         | T             | Francci3_3740 | diguanylate                                          |                    |                   |                                            |      |      |      | 99.7 |       |        |       |
| 4,476,740     | SNV            | C         | T             | Francci3_3740 | diguanylate                                          |                    | Pro433Leu         |                                            |      |      | 99.7 |      |       |        |       |
| 4,482,367     | SNV            | G         | A             | Francci3_3744 | UvrD/REP helicase                                    |                    | Ala910Val         | 99.7                                       |      | 79.2 |      |      |       |        |       |
| 4,482,379     | SNV            | G         | A             | Francci3_3744 | UvrD/REP helicase                                    |                    | Ala906Val         | 100                                        |      | 78.3 |      |      |       |        |       |

Table S2

| Position (nt) | Mutation type* | WT allele | Mutant allele | Gene ID       | Annotation                             | N fixation related | Amino acid change | Reads that called a mutation/all reads (%) |      |      |      |      |       |        |       |
|---------------|----------------|-----------|---------------|---------------|----------------------------------------|--------------------|-------------------|--------------------------------------------|------|------|------|------|-------|--------|-------|
|               |                |           |               |               |                                        |                    |                   | N3H4                                       | N4H4 | N6F4 | N7C9 | N9D9 | N10E6 | G21E10 | G23C4 |
| 4,497,809     | SNV            | G         | A             | Francci3_3749 | hypothetical protein                   |                    | Asp56Asn          |                                            |      |      |      | 84.0 |       |        |       |
| 4,509,799     | SNV            | C         | T             | Francci3_3760 | signal transduction histidine kinase   |                    | Asp31Asn          |                                            | 99.8 |      |      |      |       |        |       |
| 4,514,801     | SNV            | C         | T             | Francci3_3764 | putative PAS/PAC sensor protein        |                    |                   |                                            |      | 99.1 |      |      |       |        |       |
| 4,519,473     | SNV            | G         | A             |               |                                        |                    |                   |                                            |      | 99.4 | 99.6 |      |       |        |       |
| 4,562,405     | SNV            | G         | A             | Francci3_3805 | DNA end-binding protein Ku             |                    |                   |                                            |      | 79.1 |      |      |       |        |       |
| 4,568,687     | SNV            | G         | A             |               |                                        |                    |                   |                                            |      |      | 84.9 |      |       |        |       |
| 4,575,284     | SNV            | G         | A             | Francci3_3817 | MgtE intracellular region              |                    |                   |                                            |      | 99.9 |      |      |       |        |       |
| 4,590,662     | SNV            | G         | A             | Francci3_3829 | sec-independent translocase            |                    | Pro137Leu         |                                            | 99.4 |      |      |      |       |        |       |
| 4,591,556     | SNV            | G         | A             | Francci3_3830 | peptidase S1 and S6,                   |                    |                   |                                            | 99.9 |      |      |      |       |        |       |
| 4,597,252     | SNV            | C         | T             | Francci3_3835 | hypothetical protein                   |                    | Ala241Val         |                                            |      |      |      |      | 99.7  |        |       |
| 4,606,090     | SNV            | G         | A             | Francci3_3845 | 4Fe-4S ferredoxin, iron-sulfur binding |                    |                   | 99.6                                       |      | 80.1 |      |      |       |        |       |
| 4,608,629     | SNV            | G         | A             | Francci3_3847 | hypothetical protein                   |                    | Pro450Ser         |                                            | 99.1 |      |      |      |       |        |       |
| 4,615,290     | SNV            | C         | T             | Francci3_3852 | glycosyl transferase family protein    |                    | Ala271Thr         |                                            |      |      |      |      | 99.7  |        |       |
| 4,615,935     | SNV            | C         | T             | Francci3_3852 | glycosyl transferase family protein    |                    | Asp56Asn          |                                            |      |      |      |      | 99.7  |        |       |
| 4,616,110     | SNV            | T         | C             |               |                                        |                    |                   | 99.3                                       | 99.3 | 99.8 | 98.8 | 99.3 | 99.4  | 100    | 100   |
| 4,624,021     | SNV            | G         | A             | Francci3_3860 | hypothetical protein                   |                    | Ala252Thr         |                                            | 99.8 |      |      |      |       |        |       |
| 4,635,179     | SNV            | G         | A             | Francci3_3872 | hypothetical protein                   |                    | Val140Ile         |                                            |      |      |      | 100  |       |        |       |
| 4,635,430     | SNV            | C         | T             | Francci3_3872 | hypothetical protein                   |                    |                   |                                            |      |      |      |      | 99.8  |        |       |
| 4,642,688     | SNV            | C         | T             | Francci3_3880 | exodeoxyribonuclease VII large         |                    |                   |                                            |      |      |      |      | 99.6  |        |       |
| 4,643,281     | SNV            | C         | T             | Francci3_3880 | exodeoxyribonuclease VII large         |                    | Ala31Thr          |                                            |      |      |      |      | 99.8  |        |       |
| 4,645,458     | SNV            | G         | A             | Francci3_3882 | fumarate hydratase                     |                    | Gly231Asp         |                                            |      | 99.9 |      |      |       |        |       |
| 4,653,127     | SNV            | C         | T             | Francci3_3889 | HAD family hydrolase                   |                    | Val225Met         |                                            |      |      |      |      | 99.8  |        |       |
| 4,654,249     | SNV            | C         | T             |               |                                        |                    |                   |                                            |      |      |      |      | 99.5  |        |       |
| 4,655,001     | SNV            | C         | T             | Francci3_3891 | hypothetical protein                   |                    |                   |                                            |      |      |      |      | 99.6  |        |       |
| 4,655,459     | SNV            | C         | T             | Francci3_3892 | hypothetical protein                   |                    |                   |                                            |      |      |      |      | 99.5  |        |       |
| 4,655,533     | SNV            | C         | T             | Francci3_3892 | hypothetical protein                   |                    | Val336Met         |                                            |      |      |      |      | 99.7  |        |       |
| 4,655,641     | SNV            | C         | T             | Francci3_3892 | hypothetical protein                   |                    | Ala300Thr         |                                            |      |      |      |      | 99.7  |        |       |
| 4,656,097     | SNV            | G         | A             | Francci3_3892 | hypothetical protein                   |                    | Pro148Ser         | 99.9                                       |      | 84.4 |      |      |       |        |       |
| 4,657,453     | SNV            | C         | T             | Francci3_3894 | hypothetical protein                   |                    | Pro48Ser          |                                            |      |      |      |      | 99.8  |        |       |
| 4,659,481     | SNV            | C         | T             | Francci3_3896 | PhoH-like protein                      |                    | Ala131Thr         |                                            |      |      |      |      | 99.5  |        |       |
| 4,660,058     | SNV            | C         | T             |               |                                        |                    |                   |                                            |      |      |      |      | 99.7  |        |       |
| 4,660,969     | SNV            | C         | T             |               |                                        |                    |                   |                                            |      |      |      |      | 99.7  |        |       |
| 4,661,017     | SNV            | C         | T             |               |                                        |                    |                   |                                            |      |      |      |      | 99.7  |        |       |
| 4,663,667     | SNV            | C         | T             | Francci3_3898 | hemolysin III family channel protein   |                    | Pro225Ser         |                                            |      |      |      |      | 100   |        |       |
| 4,663,860     | SNV            | C         | T             | Francci3_3898 | hemolysin III family channel protein   |                    | Thr289Ile         |                                            |      |      |      |      | 99.5  |        |       |
| 4,664,071     | SNV            | C         | T             | Francci3_3899 | hypothetical protein                   |                    | Ser145Asn         |                                            |      |      |      |      | 99.9  |        |       |
| 4,665,432     | SNV            | C         | T             | Francci3_3900 | hypothetical protein                   |                    |                   |                                            |      |      |      |      | 99.9  |        |       |
| 4,669,042     | SNV            | C         | T             | Francci3_3901 | leucyl-tRNA synthetase                 |                    |                   |                                            |      |      |      |      | 99.8  |        |       |
| 4,670,458     | SNV            | C         | T             | Francci3_3902 | hypothetical protein                   |                    | Met60Ile          |                                            |      | 99.8 |      |      |       |        |       |
| 4,670,697     | SNV            | C         | T             |               |                                        |                    |                   |                                            |      |      |      |      | 99.6  |        |       |

Table S2

| Position (nt) | Mutation type* | WT allele | Mutant allele | Gene ID                         | Annotation                                                          | N fixation related | Amino acid change       | Reads that called a mutation/all reads (%) |      |      |      |      |       |        |       |
|---------------|----------------|-----------|---------------|---------------------------------|---------------------------------------------------------------------|--------------------|-------------------------|--------------------------------------------|------|------|------|------|-------|--------|-------|
|               |                |           |               |                                 |                                                                     |                    |                         | N3H4                                       | N4H4 | N6F4 | N7C9 | N9D9 | N10E6 | G21E10 | G23C4 |
| 4,671,570     | SNV            | C         | T             | Francci3_3903                   | LmbE-like protein                                                   |                    | Gly51Arg                |                                            |      |      |      |      | 99.6  |        |       |
| 4,676,197     | SNV            | C         | T             | Francci3_3906;<br>Francci3_3907 | von Willebrand factor type A; PadR family transcriptional regulator |                    | Ala644Val;<br>Gly203Asp |                                            |      |      |      |      | 99.4  |        |       |
| 4,703,838     | SNV            | C         | T             |                                 |                                                                     |                    |                         | 99.8                                       |      | 80.3 |      |      |       |        |       |
| 4,703,915     | SNV            | C         | T             |                                 |                                                                     |                    |                         | 99.9                                       |      | 80.3 |      |      |       |        |       |
| 4,711,315     | SNV            | C         | T             | Francci3_3936                   | lipopolysaccharide biosynthesis                                     |                    | Val438Ile               |                                            |      |      |      | 99.8 |       |        |       |
| 4,711,554     | SNV            | G         | A             | Francci3_3936                   | lipopolysaccharide biosynthesis                                     |                    | Thr358Ile               |                                            |      |      |      | 99.6 |       |        |       |
| 4,711,872     | SNV            | C         | T             | Francci3_3936                   | lipopolysaccharide biosynthesis                                     |                    | Trp252*                 |                                            |      |      |      | 99.8 |       |        |       |
| 4,715,947     | SNV            | C         | T             | Francci3_3938                   | methyltransferase type 12                                           |                    |                         |                                            |      |      |      |      | 100   |        |       |
| 4,719,423     | SNV            | C         | T             | Francci3_3942                   | serine O-acetyltransferase                                          |                    | Gly204Asp               |                                            |      |      |      | 99.4 |       |        |       |
| 4,737,977     | SNV            | C         | T             | Francci3_3959                   | ABC transporter related                                             |                    | Leu447Phe               |                                            | 99.8 |      |      |      |       |        |       |
| 4,745,038     | SNV            | G         | A             |                                 |                                                                     |                    |                         |                                            |      |      | 99.7 |      |       |        |       |
| 4,754,472     | SNV            | C         | T             | Francci3_3973                   | FHA domain-containing protein                                       |                    | Ala79Val                |                                            |      |      | 100  |      |       |        |       |
| 4,758,440     | SNV            | C         | T             | Francci3_3976                   | glycoside hydrolase family protein                                  |                    | Leu82Phe                |                                            |      |      | 99.9 |      |       |        |       |
| 4,773,593     | SNV            | C         | T             | Francci3_3989                   | recombinase                                                         |                    | Ala384Thr               |                                            |      |      |      | 99.7 |       |        |       |
| 4,794,428     | SNV            | C         | T             | Francci3_4011                   | HsdR family type I site-specific deoxyribonuclease                  |                    | Ala735Thr               |                                            |      |      |      |      | 99.5  |        |       |
| 4,794,495     | SNV            | G         | A             | Francci3_4011                   | HsdR family type I site-specific deoxyribonuclease                  |                    |                         |                                            |      |      | 99.6 |      |       |        |       |
| 4,799,573     | SNV            | C         | T             | Francci3_4013                   | transposase, IS4                                                    |                    |                         |                                            |      |      | 95.0 |      |       |        |       |
| 4,801,533     | SNV            | G         | A             | Francci3_4014                   | N-6 DNA methylase                                                   |                    |                         |                                            |      |      |      | 99.8 |       |        |       |
| 4,806,111     | SNV            | G         | A             | Francci3_4019                   | hypothetical protein                                                |                    |                         |                                            |      | 80.4 |      |      |       |        |       |
| 4,813,327     | SNV            | G         | A             | Francci3_4026                   | AMP-dependent synthetase and ligase                                 |                    | Val326Ile               |                                            |      |      | 99.7 |      |       |        |       |
| 4,832,251     | SNV            | C         | T             | Francci3_4047                   | WD-40 repeat-containing serine/threonin protein kinase              |                    |                         |                                            | 99.7 |      |      |      |       |        |       |
| 4,836,174     | SNV            | G         | A             | Francci3_4049                   | GAF sensor hybrid histidine kinase                                  |                    | Ala922Val               |                                            |      | 77.6 |      |      |       |        |       |
| 4,856,100     | SNV            | C         | T             | Francci3_4059                   | L-glutamine synthetase                                              |                    | Pro441Leu               |                                            |      |      | 99.8 |      |       |        |       |
| 4,859,393     | SNV            | A         | G             | Francci3_4061                   | TetR family transcriptional regulator                               |                    | *196Trp                 | 99.7                                       | 99.8 | 100  | 99.7 | 99.9 | 99.8  | 100    | 100   |
| 4,860,306     | SNV            | C         | T             | Francci3_4062                   | hypothetical protein                                                |                    | Ala144Thr               |                                            |      |      |      |      | 99.8  |        |       |
| 4,864,209     | SNV            | G         | A             | Francci3_4064                   | methyltransferase FkbM                                              |                    | Pro88Ser                |                                            |      |      | 99.8 | 99.5 |       |        |       |
| 4,865,296     | SNV            | C         | T             | Francci3_4065                   | glycine dehydrogenase                                               |                    | Gly905Ser               |                                            |      |      | 99.9 |      |       |        |       |
| 4,875,183     | SNV            | G         | A             |                                 |                                                                     |                    |                         | 99.3                                       |      |      |      |      |       |        |       |
| 4,878,114     | SNV            | C         | T             |                                 |                                                                     |                    |                         |                                            | 99.8 |      |      |      |       |        |       |
| 4,887,526     | SNV            | G         | A             | Francci3_4081                   | putative transposase                                                |                    | Ser200Phe               |                                            |      |      | 99.8 |      |       |        |       |
| 4,888,665     | SNV            | G         | A             | Francci3_4082                   | DNA polymerase III subunit alpha                                    |                    | Arg88His                |                                            |      |      | 97.8 |      |       |        |       |
| 4,893,058     | SNV            | G         | A             |                                 |                                                                     |                    |                         | 87.4                                       |      | 75.5 |      |      |       |        |       |
| 4,902,305     | SNV            | G         | A             | Francci3_4093                   | NUDIX hydrolase                                                     |                    | Glu159Lys               |                                            |      |      |      | 99.7 |       |        |       |
| 4,913,282     | SNV            | G         | A             | Francci3_4105                   | zinc-binding alcohol dehydrogenase                                  |                    |                         |                                            |      |      | 99.6 |      |       |        |       |
| 4,913,293     | SNV            | G         | A             | Francci3_4105                   | zinc-binding alcohol dehydrogenase                                  |                    | Gly292Asp               |                                            |      |      | 99.8 |      |       |        |       |
| 4,915,823     | SNV            | G         | A             | Francci3_4110                   | integrase                                                           |                    |                         |                                            |      |      |      |      | 99.3  |        |       |

Table S2

| Position (nt) | Mutation type* | WT allele | Mutant allele | Gene ID       | Annotation                                                        | N fixation related | Amino acid change | Reads that called a mutation/all reads (%) |      |      |      |      |       |        |
|---------------|----------------|-----------|---------------|---------------|-------------------------------------------------------------------|--------------------|-------------------|--------------------------------------------|------|------|------|------|-------|--------|
|               |                |           |               |               |                                                                   |                    |                   | N3H4                                       | N4H4 | N6F4 | N7C9 | N9D9 | N10E6 | G21E10 |
| 4,917,086     | SNV            | G         | A             | Francci3_4112 | IS630 family transposase                                          |                    | Ala133Val         |                                            |      |      | 99.3 |      |       |        |
| 4,918,142     | SNV            | C         | T             |               |                                                                   |                    |                   |                                            |      |      |      | 99.6 |       |        |
| 4,923,071     | SNV            | G         | A             | Francci3_4120 | transposase, IS4                                                  |                    |                   |                                            |      | 99.7 |      |      |       |        |
| 4,923,851     | SNV            | G         | A             | Francci3_4120 | transposase, IS4                                                  |                    |                   |                                            |      |      |      | 99.8 |       |        |
| 4,926,075     | SNV            | G         | A             |               |                                                                   |                    |                   |                                            |      |      |      | 99.9 |       |        |
| 4,926,615     | SNV            | G         | A             | Francci3_4124 | recombinase                                                       |                    | Gly170Asp         |                                            |      |      | 99.9 |      |       |        |
| 4,931,383     | SNV            | G         | A             | Francci3_4129 | hypothetical protein                                              |                    |                   |                                            |      |      |      | 99.8 |       |        |
| 4,932,472     | SNV            | C         | T             | Francci3_4131 | hypothetical protein                                              |                    | Val162Met         |                                            |      | 99.4 |      |      |       |        |
| 4,932,863     | SNV            | C         | T             | Francci3_4131 | hypothetical protein                                              |                    |                   |                                            |      | 99.3 |      |      |       |        |
| 4,935,872     | SNV            | C         | T             | Francci3_4134 | NDP-hexose 2,3-dehydratase                                        |                    | Gly307Asp         |                                            |      |      |      | 99.9 |       |        |
| 4,937,206     | SNV            | C         | T             | Francci3_4135 | methyltransferase type 11                                         |                    | Arg41Trp          |                                            |      | 99.8 |      |      |       |        |
| 4,938,840     | SNV            | C         | T             | Francci3_4137 | TetR family transcriptional regulator                             |                    | Ala110Val         |                                            |      |      |      | 99.6 |       |        |
| 4,940,338     | SNV            | C         | T             | Francci3_4138 | short chain dehydrogenase                                         |                    | Ala294Val         |                                            |      |      |      | 99.4 |       |        |
| 4,942,380     | SNV            | G         | A             | Francci3_4140 | luciferase-like                                                   |                    | Thr75Ile          |                                            |      |      |      | 98.8 |       |        |
| 4,942,522     | SNV            | G         | A             | Francci3_4140 | luciferase-like                                                   |                    |                   |                                            |      |      |      | 99.7 |       |        |
| 4,944,666     | SNV            | G         | A             | Francci3_4143 | actinorhodin polyketide synthase bifunctional cyclase/dehydratase |                    |                   |                                            |      |      |      | 99.7 |       |        |
| 4,948,178     | SNV            | G         | A             | Francci3_4147 | phosphopantetheine-binding                                        |                    |                   |                                            |      |      |      | 100  |       |        |
| 4,948,658     | SNV            | G         | A             | Francci3_4148 | beta-ketoacyl synthase                                            |                    |                   |                                            |      |      |      | 99.6 |       |        |
| 4,948,776     | SNV            | G         | A             | Francci3_4148 | beta-ketoacyl synthase                                            |                    | Thr144Ile         |                                            |      |      |      | 99.6 |       |        |
| 4,950,736     | SNV            | C         | T             | Francci3_4151 | actinorhodin polyketide synthase bifunctional cyclase/dehydratase |                    |                   |                                            |      |      |      | 99.9 |       |        |
| 4,955,100     | SNV            | G         | A             | Francci3_4154 | EmrB/QacA family drug resistance transporter                      |                    |                   |                                            |      | 99.8 |      |      |       |        |
| 4,958,784     | SNV            | T         | C             | Francci3_4157 | hypothetical protein                                              |                    | Val99Ala          |                                            |      | 99.9 |      |      |       |        |
| 4,960,995     | SNV            | G         | A             | Francci3_4159 | hypothetical protein                                              |                    | Pro239Leu         |                                            |      | 99.6 |      |      |       |        |
| 4,962,125     | SNV            | G         | A             | Francci3_4160 | hypothetical protein                                              |                    | Val127Met         |                                            |      |      |      | 99.3 |       |        |
| 4,963,998     | SNV            | G         | A             | Francci3_4162 | putative replication initiation protein                           |                    |                   |                                            |      | 98.9 |      |      |       |        |
| 4,969,175     | SNV            | G         | A             | Francci3_4167 | putative transposase                                              |                    | Ala182Thr         |                                            |      | 99.5 |      |      |       |        |
| 4,972,732     | SNV            | C         | T             | Francci3_4168 | DNA polymerase III subunit alpha                                  |                    | Gly67Arg          | 99.7                                       |      | 83.3 |      |      |       |        |
| 4,972,956     | SNV            | C         | T             |               |                                                                   |                    |                   |                                            |      |      |      | 99.2 |       |        |
| 4,974,021     | SNV            | C         | T             | Francci3_4170 | hypothetical protein                                              |                    | Ala204Thr         |                                            |      |      |      | 99.3 |       |        |
| 4,974,358     | SNV            | G         | A             | Francci3_4170 | hypothetical protein                                              |                    |                   |                                            |      | 99.8 |      |      |       |        |
| 4,976,568     | SNV            | C         | T             |               |                                                                   |                    |                   |                                            |      |      |      | 99.8 |       |        |
| 4,977,825     | SNV            | G         | A             | Francci3_4174 | copper resistance protein CopC                                    |                    | Ala211Val         |                                            |      | 99.7 |      |      |       |        |
| 4,977,937     | SNV            | G         | A             | Francci3_4174 | copper resistance protein CopC                                    |                    | Leu174Phe         |                                            |      | 99.5 |      |      |       |        |
| 4,978,451     | SNV            | G         | A             | Francci3_4174 | copper resistance protein CopC                                    |                    |                   |                                            |      | 99.7 |      |      |       |        |
| 4,980,130     | SNV            | C         | T             |               |                                                                   |                    |                   |                                            |      |      |      | 99.5 |       |        |
| 4,981,889     | SNV            | C         | T             | Francci3_4178 | monooxygenase, FAD-binding                                        |                    | Thr120Ile         |                                            |      |      |      | 99.7 |       |        |
| 4,982,951     | SNV            | C         | T             | Francci3_4178 | monooxygenase, FAD-binding                                        |                    | Ala474Val         |                                            |      |      |      | 99.5 |       |        |

Table S2

| Position (nt) | Mutation type* | WT allele | Mutant allele | Gene ID       | Annotation                                             | N fixation related | Amino acid change | Reads that called a mutation/all reads (%) |      |      |      |      |       |        |
|---------------|----------------|-----------|---------------|---------------|--------------------------------------------------------|--------------------|-------------------|--------------------------------------------|------|------|------|------|-------|--------|
|               |                |           |               |               |                                                        |                    |                   | N3H4                                       | N4H4 | N6F4 | N7C9 | N9D9 | N10E6 | G21E10 |
| 4,983,018     | SNV            | C         | T             | Francci3_4178 | monooxygenase, FAD-binding                             |                    |                   |                                            |      |      |      |      | 99.6  |        |
| 4,983,593     | SNV            | C         | T             | Francci3_4179 | hypothetical protein                                   |                    |                   |                                            |      |      |      |      | 99.8  |        |
| 4,984,371     | SNV            | C         | T             | Francci3_4180 | PAS/PAC sensor hybrid histidine                        |                    | Gly475Asp         |                                            |      |      |      |      | 99.2  |        |
| 4,984,742     | SNV            | C         | T             | Francci3_4180 | PAS/PAC sensor hybrid histidine                        |                    |                   |                                            |      |      |      |      | 99.5  |        |
| 4,986,672     | SNV            | C         | T             | Francci3_4182 | hypothetical protein                                   |                    |                   |                                            |      |      |      |      | 90.6  |        |
| 4,990,321     | SNV            | G         | A             | Francci3_4184 | hypothetical protein                                   |                    | Val628Ile         |                                            |      |      |      |      | 99.9  |        |
| 4,995,924     | SNV            | G         | A             | Francci3_4186 | tetratricopeptide TPR_4                                |                    |                   |                                            |      |      |      |      | 99.7  |        |
| 4,997,001     | SNV            | G         | A             | Francci3_4186 | tetratricopeptide TPR_4                                |                    |                   |                                            |      |      |      |      | 99.7  |        |
| 4,997,188     | SNV            | G         | A             | Francci3_4186 | tetratricopeptide TPR_4                                |                    | Ala436Val         |                                            |      |      |      |      | 99.9  |        |
| 4,997,315     | SNV            | G         | A             | Francci3_4186 | tetratricopeptide TPR_4                                |                    | Pro394Ser         |                                            |      |      |      |      | 99.9  |        |
| 4,998,685     | SNV            | C         | T             | Francci3_4187 | biotin synthase                                        |                    | Asp317Asn         |                                            |      |      |      |      | 99.6  |        |
| 5,005,062     | SNV            | G         | A             | Francci3_4194 | methyltransferase type 12                              |                    |                   |                                            |      |      |      | 86.8 |       |        |
| 5,008,835     | SNV            | G         | A             | Francci3_4196 | hypothetical protein                                   |                    | Glu656Lys         |                                            |      | 99.7 |      |      |       |        |
| 5,018,351     | SNV            | C         | T             | Francci3_4203 | 3-(3-hydroxyphenyl)propionate                          |                    | Glu255Lys         |                                            |      | 99.6 |      |      |       |        |
| 5,024,447     | SNV            | C         | T             |               |                                                        |                    |                   |                                            |      |      |      |      | 99.4  |        |
| 5,032,002     | SNV            | C         | T             | Francci3_4214 | insertion element hypothetical protein                 |                    | Pro411Ser         |                                            |      |      |      |      | 99.4  |        |
| 5,040,629     | SNV            | G         | A             |               |                                                        |                    |                   |                                            |      |      |      |      | 99.9  |        |
| 5,040,683     | SNV            | G         | A             | Francci3_4225 | putative transposase                                   |                    | Ser69Phe          |                                            |      |      |      |      | 99.9  |        |
| 5,042,811     | SNV            | C         | T             | Francci3_4227 | transposase, IS4                                       |                    | Gly119Glu         |                                            |      | 99.5 |      |      |       |        |
| 5,044,962     | SNV            | C         | T             | Francci3_4229 | hypothetical protein                                   |                    | Gly76Glu          |                                            |      | 99.8 |      |      |       |        |
| 5,050,489     | SNV            | G         | A             | Francci3_4232 | nitroreductase                                         |                    | Gln16*            |                                            |      | 99.7 |      |      |       |        |
| 5,054,194     | SNV            | C         | T             | Francci3_4235 | peptidase S15                                          |                    |                   |                                            | 100  | 99.9 | 99.9 | 99.8 | 100   | 100    |
| 5,068,192     | SNV            | G         | A             |               |                                                        |                    |                   |                                            |      |      |      |      | 99.8  |        |
| 5,068,708     | SNV            | G         | A             | Francci3_4246 | RNA methyltransferase TrmH, group 3                    |                    |                   |                                            |      |      |      |      | 99.8  |        |
| 5,069,109     | SNV            | G         | A             | Francci3_4246 | RNA methyltransferase TrmH, group 3                    |                    | Arg61Cys          |                                            |      |      |      |      | 99.4  |        |
| 5,069,824     | SNV            | G         | A             | Francci3_4247 | hypothetical protein                                   |                    | Gly98Asp          |                                            |      |      |      |      | 99.7  |        |
| 5,071,828     | SNV            | G         | A             | Francci3_4249 | hypothetical protein                                   |                    | Val116Ile         |                                            |      | 81.1 |      |      |       |        |
| 5,071,851     | SNV            | G         | A             | Francci3_4249 | hypothetical protein                                   |                    |                   |                                            |      |      |      |      | 99.9  |        |
| 5,073,324     | SNV            | G         | A             | Francci3_4250 | FHA domain-containing protein                          |                    |                   |                                            |      |      |      |      | 99.8  |        |
| 5,075,444     | SNV            | G         | A             | Francci3_4252 | pyridoxamine 5'-phosphate oxidase-related, FMN-binding |                    |                   |                                            |      |      |      |      | 99.9  |        |
| 5,079,030     | SNV            | C         | T             | Francci3_4257 | hypothetical protein                                   |                    |                   |                                            |      |      |      |      | 100   | 100    |
| 5,090,842     | SNV            | G         | A             | Francci3_4267 | prolyl-tRNA synthetase                                 |                    | Ala270Thr         |                                            |      | 99.8 |      |      |       |        |
| 5,097,056     | SNV            | G         | A             |               |                                                        |                    |                   |                                            | 99.7 |      |      |      |       |        |
| 5,098,314     | SNV            | G         | A             |               |                                                        |                    |                   |                                            |      |      |      |      | 99.5  |        |
| 5,100,908     | SNV            | C         | T             |               |                                                        |                    |                   |                                            |      |      |      |      |       |        |
| 5,109,124     | SNV            | C         | T             | Francci3_4278 | transcription factor WhiB                              |                    |                   |                                            |      |      |      |      | 99.6  |        |
| 5,111,402     | SNV            | G         | A             | Francci3_4280 | anion-transporting ATPase                              |                    | Pro124Leu         |                                            |      |      | 88.5 |      |       |        |
| 5,119,246     | SNV            | C         | T             | Francci3_4286 | Crp/FNR family transcriptional                         |                    | Asp30Asn          |                                            |      | 78.2 |      |      |       |        |
| 5,119,629     | SNV            | G         | A             | Francci3_4287 | hypothetical protein                                   |                    | Ala31Val          |                                            | 99.9 |      | 79.7 |      |       |        |

Table S2

| Position (nt) | Mutation type* | WT allele                    | Mutant allele | Gene ID       | Annotation                                               | N fixation related | Amino acid change | Reads that called a mutation/all reads (%) |      |      |      |      |       |        |       |
|---------------|----------------|------------------------------|---------------|---------------|----------------------------------------------------------|--------------------|-------------------|--------------------------------------------|------|------|------|------|-------|--------|-------|
|               |                |                              |               |               |                                                          |                    |                   | N3H4                                       | N4H4 | N6F4 | N7C9 | N9D9 | N10E6 | G21E10 | G23C4 |
| 5,121,291     | Deletion       | CCCA<br>CCGG<br>CACC<br>GTCC | -             | Francci3_4290 | NUDIX hydrolase                                          |                    | Ala265_Pro270del  |                                            | 59.5 |      | 55.2 | 57.1 | 56.1  |        |       |
| 5,144,752     | SNV            | G                            | A             | Francci3_4306 | thymidylate kinase                                       |                    |                   |                                            |      |      |      | 99.8 |       |        |       |
| 5,145,924     | SNV            | G                            | A             | Francci3_4307 | DNA polymerase III subunit delta'                        |                    | Gly352Asp         |                                            |      |      |      | 99.8 |       |        |       |
| 5,146,450     | SNV            | G                            | A             | Francci3_4308 | PSP1                                                     |                    | Val62Ile          |                                            |      |      |      | 99.9 |       |        |       |
| 5,148,596     | SNV            | G                            | A             | Francci3_4310 | inorganic diphosphatase                                  |                    |                   |                                            |      |      |      | 99.8 |       |        |       |
| 5,151,658     | SNV            | G                            | A             | Francci3_4312 | hypothetical protein                                     |                    |                   |                                            |      |      |      | 99.6 |       |        |       |
| 5,154,998     | SNV            | C                            | T             | Francci3_4314 | membrane protease FtsH catalytic                         |                    | Ala210Val         |                                            |      |      |      |      |       | 100    | 100   |
| 5,161,777     | SNV            | G                            | A             | Francci3_4320 | hypothetical protein                                     |                    | Asp120Asn         |                                            |      |      | 100  |      |       |        |       |
| 5,173,858     | SNV            | C                            | T             | Francci3_4331 | hypothetical protein                                     |                    |                   |                                            |      |      |      | 99.7 |       |        |       |
| 5,189,244     | SNV            | C                            | T             | Francci3_4347 | glycoside hydrolase family protein                       |                    | Ala635Thr         |                                            |      |      |      | 99.7 |       |        |       |
| 5,190,651     | SNV            | C                            | T             | Francci3_4347 | glycoside hydrolase family protein                       |                    | Val166Ile         |                                            |      |      |      | 99.8 |       |        |       |
| 5,193,966     | SNV            | G                            | A             | Francci3_4350 | protein of unknown function DUF224, cysteine-rich region |                    | Pro343Ser         |                                            |      |      |      | 99.7 |       |        |       |
| 5,199,143     | SNV            | G                            | A             | Francci3_4353 | GrpE protein                                             |                    |                   |                                            |      |      | 99.9 |      |       |        |       |
| 5,200,133     | SNV            | T                            | C             | Francci3_4354 | chaperone DnaJ-like                                      |                    |                   |                                            | 99.8 |      |      |      |       |        |       |
| 5,200,362     | SNV            | C                            | T             | Francci3_4354 | chaperone DnaJ-like                                      |                    | Arg144Cys         |                                            |      |      | 99.6 |      |       |        |       |
| 5,202,857     | SNV            | C                            | T             | Francci3_4356 | ATPase AAA-2                                             |                    | Arg333Cys         |                                            |      |      | 99.7 |      |       |        |       |
| 5,203,730     | SNV            | C                            | T             | Francci3_4356 | ATPase AAA-2                                             |                    | Leu624Phe         |                                            |      |      | 99.9 |      |       |        |       |
| 5,204,177     | SNV            | G                            | A             | Francci3_4356 | ATPase AAA-2                                             |                    | Asp773Asn         |                                            |      |      | 99.7 |      |       |        |       |
| 5,204,478     | SNV            | C                            | T             |               |                                                          |                    |                   |                                            |      |      | 99.8 |      |       |        |       |
| 5,205,587     | SNV            | G                            | A             | Francci3_4358 | membrane-flanked domain-containing protein               |                    |                   |                                            |      |      |      | 99.8 |       |        |       |
| 5,205,770     | SNV            | C                            | T             | Francci3_4358 | membrane-flanked domain-containing protein               |                    |                   |                                            |      | 99.9 |      |      |       |        |       |
| 5,207,371     | SNV            | G                            | A             | Francci3_4359 | hypothetical protein                                     |                    | Pro54Ser          |                                            |      |      | 99.5 |      |       |        |       |
| 5,208,833     | SNV            | G                            | A             | Francci3_4361 | NAD-dependent                                            |                    | Pro342Ser         |                                            |      |      |      | 99.6 |       |        |       |
| 5,219,718     | SNV            | G                            | A             | Francci3_4370 | phosphoribosylamine--glycine ligase                      |                    |                   |                                            |      |      | 99.7 |      |       |        |       |
| 5,261,001     | SNV            | G                            | A             | Francci3_4400 | helicase-like                                            |                    | Ala77Val          |                                            |      |      | 99.7 |      |       |        |       |
| 5,261,202     | SNV            | G                            | A             | Francci3_4400 | helicase-like                                            |                    | Ser10Leu          |                                            |      |      | 99.9 |      |       |        |       |
| 5,268,561     | SNV            | C                            | T             | Francci3_4407 | dihydropteroate synthase                                 |                    | Gly132Asp         | 99.9                                       |      | 85.1 |      |      |       |        |       |
| 5,268,997     | SNV            | G                            | A             | Francci3_4408 | GCN5-related N-acetyltransferase                         |                    |                   | 99.7                                       |      | 77.7 |      |      |       |        |       |
| 5,312,875     | SNV            | G                            | A             | Francci3_4445 | hypothetical protein                                     |                    | Gly76Asp          |                                            |      |      | 99.7 |      |       |        |       |
| 5,340,439     | SNV            | G                            | A             | Francci3_4468 | hypothetical protein                                     |                    | Ala10Thr          | 99.6                                       |      | 82.9 |      |      |       |        |       |
| 5,358,845     | SNV            | G                            | A             | Francci3_4487 | nifD; nitrogenase molybdenum-iron protein alpha chain    | yes                | Thr285Ile         |                                            |      |      | 99.7 |      |       |        |       |
| 5,358,859     | SNV            | G                            | A             | Francci3_4487 | nifD; nitrogenase molybdenum-iron protein alpha chain    | yes                |                   |                                            |      |      | 99.8 |      |       |        |       |



Table S2

| Position (nt) | Mutation type* | WT allele | Mutant allele | Gene ID                         | Annotation                                                 | N fixation related | Amino acid change | Reads that called a mutation/all reads (%) |      |      |      |      |       |        |       |
|---------------|----------------|-----------|---------------|---------------------------------|------------------------------------------------------------|--------------------|-------------------|--------------------------------------------|------|------|------|------|-------|--------|-------|
|               |                |           |               |                                 |                                                            |                    |                   | N3H4                                       | N4H4 | N6F4 | N7C9 | N9D9 | N10E6 | G21E10 | G23C4 |
| 5,360,263     | SNV            | C         | T             | Francci3_4488                   | nifH; nitrogenase iron protein subunit                     | yes                | Glu115Lys         |                                            |      |      | 99.7 |      |       |        |       |
| 5,360,424     | SNV            | G         | A             | Francci3_4488                   | nifH; nitrogenase iron protein subunit                     | yes                | Ala61Val          |                                            |      |      | 99.9 |      |       |        |       |
| 5,368,010     | SNV            | G         | A             | Francci3_4495;<br>Francci3_4496 | peptidase M52; nickel-dependent hydrogenase, large subunit |                    | ; Pro4Ser         |                                            |      |      | 99.7 |      |       |        |       |
| 5,378,755     | SNV            | G         | A             |                                 |                                                            |                    |                   |                                            |      |      |      | 99.6 |       |        |       |
| 5,387,103     | SNV            | G         | A             | Francci3_4512                   | hypothetical protein                                       |                    | Trp302*           |                                            |      |      |      | 99.5 |       |        |       |
| 5,389,116     | SNV            | C         | T             | Francci3_4514                   | hypothetical protein                                       |                    | Ser215Phe         |                                            |      |      |      | 99.9 |       |        |       |
| 5,389,227     | SNV            | T         | C             | Francci3_4514                   | hypothetical protein                                       |                    | Val252Ala         |                                            |      | 99.8 |      |      |       |        |       |
| 5,389,470     | SNV            | C         | T             | Francci3_4514                   | hypothetical protein                                       |                    | Ala333Val         |                                            |      |      |      | 99.7 |       |        |       |
| 5,391,574     | SNV            | C         | T             |                                 |                                                            |                    |                   |                                            |      |      |      | 99.6 |       |        |       |
| 5,393,406     | SNV            | C         | T             | Francci3_4518                   | primary replicative DNA helicase                           |                    |                   |                                            |      |      |      | 99.9 |       |        |       |
| 5,399,712     | SNV            | C         | T             | Francci3_4525                   | hypothetical protein                                       |                    | Arg336His         |                                            | 99.9 |      | 99.8 | 99.6 | 99.9  | 100    | 100   |
| 5,401,127     | SNV            | C         | T             | Francci3_4526                   | glycosyl transferase family protein                        |                    | Gly946Asp         |                                            |      |      | 99.6 |      |       |        |       |
| 5,408,700     | SNV            | C         | T             | Francci3_4531                   | metal dependent phosphohydrolase                           |                    | Val493Ile         |                                            | 99.8 |      | 99.6 | 99.9 | 99.6  | 100    | 100   |
| 5,416,789     | SNV            | C         | T             | Francci3_4534                   | serine/threonine protein kinase                            |                    | Ala127Val         |                                            |      |      |      | 99.9 |       |        |       |
| 5,417,385     | SNV            | G         | A             | Francci3_4534                   | serine/threonine protein kinase                            |                    | Ala326Thr         |                                            |      |      | 99.9 |      |       |        |       |
| 5,417,403     | SNV            | G         | A             | Francci3_4534                   | serine/threonine protein kinase                            |                    | Ala332Thr         |                                            |      |      | 99.8 |      |       |        |       |
| 5,421,853     | SNV            | G         | A             | Francci3_4537                   | thioredoxin                                                |                    | Met74Ile          |                                            |      |      | 99.7 |      |       |        |       |
| 5,425,394     | SNV            | G         | A             | Francci3_4540                   | chromosome segregation DNA-binding protein                 |                    |                   |                                            |      |      | 99.5 |      |       |        |       |
| 5,427,163     | SNV            | G         | A             | Francci3_4542                   | 16S rRNA methyltransferase GidB                            |                    |                   |                                            | 99.8 |      | 76.2 |      |       |        |       |
| 5,427,709     | Insertion      | -         | C             |                                 |                                                            |                    |                   |                                            | 54.2 |      |      |      |       |        |       |
| 5,430,367     | SNV            | C         | T             | Francci3_4545                   | 60 kDa inner membrane insertion                            |                    | Gly445Asp         |                                            |      |      | 99.5 |      |       |        |       |

\*SNV represents single nucleotide variation.

†Mutation was detected but the value was not assigned.
